# Supplementary material for: The developmental transcriptome of the bamboo snout beetle Cyrtotrachelus buqueti and insights into candidate pheromone-binding proteins
Source: PLoS One. 2017 Jun 29;12(6):e0179807. doi: 10.1371/journal.pone.0179807 (PMC5491049; doi:10.1371/journal.pone.0179807)
Supplement: S19 Text — (XLS) [file pone.0179807.s019.xls]

gene_id	CB_E_readcount	CB_C_readcount	log2FoldChange	pval	padj
c20244_g1	25777.2205960035	10.1482428961663	11.311	4.0812e-162	2.0861e-157
c20424_g1	21440.1428759889	10.4308165619686	11.005	1.1549e-156	2.9516e-152
c97560_g1	19675.8719706992	9.51674676972618	11.014	2.5002e-155	4.2598e-151
c54341_g2	123.374803433965	53914.4887059093	-8.7715	3.0369e-130	3.8807e-126
c79901_g1	12107.3831261013	33.5331281283118	8.4961	7.9709e-119	8.1485e-115
c45837_g1	2759.5066995206	7.08762467569398	8.6049	3.23e-103	2.7517e-99
c67044_g22	3141.5040183307	9.91238662650414	8.308	7.4956e-103	5.4733e-99
c68154_g1	3127.07873840918	10.6592182328815	8.1966	3.1239e-101	1.9959e-97
c39928_g1	7047.45473379053	19.374362041488	8.5068	3.1845e-97	1.8086e-93
c67606_g2	1349.38283198919	1.06797284767468	10.303	1.1773e-96	6.0174e-93
c67896_g2	2.90035639575074	1516.25359371494	-9.0301	1.6428e-95	7.6336e-92
c85970_g1	69.7503720839952	8979.26814284192	-7.0083	2.6903e-93	1.1459e-89
c59213_g2	1905.21155374914	0.368553859333301	12.336	8.7098e-93	3.4245e-89
c15345_g1	3466.0735871517	22.6592590915292	7.2571	1.2194e-91	4.4521e-88
c13021_g1	3286.68077562265	2.34314190050118	10.454	8.9729e-88	2.8665e-84
c62616_g1	123.093305134892	11461.0085314211	-6.5408	8.8382e-88	2.8665e-84
c79849_g1	1460.01697244938	6.31282822670215	7.8535	3.0229e-86	9.0889e-83
c97599_g1	1117.56382724796	2.75841315597459	8.6623	8.4274e-86	2.3931e-82
c53055_g2	805.828168315785	1.03931278316434	9.5987	1.544e-81	4.1536e-78
c67001_g1	1799.90205973569	15.8675432120703	6.8257	1.5692e-79	4.0103e-76
c68110_g1	1702.57271460383	15.4856542223042	6.7806	4.8906e-78	1.1904e-74
c7903_g1	2052.70182744222	0.699418988341375	11.519	1.1844e-77	2.7518e-74
c65704_g1	807.12540058589	2.72072442564937	8.2127	1.613e-76	3.5847e-73
c66933_g2	3579.13244742032	49.0776765467024	6.1884	1.8048e-76	3.8438e-73
c80044_g1	38.5913097684093	2965.29530396772	-6.2638	2.6346e-76	5.3866e-73
c91700_g1	881.290048829888	4.14822246684246	7.731	1.7241e-75	3.3894e-72
c64192_g1	8268.19829919557	85.7716170646201	6.5909	1.3085e-74	2.4771e-71
c65925_g2	6.74501711106283	982.775797268119	-7.1869	1.9518e-74	3.4402e-71
c97318_g1	3989.3598478179	61.3445030284842	6.0231	1.9364e-74	3.4402e-71
c15362_g1	833.950942738313	4.1768825313528	7.6414	4.8937e-74	8.3378e-71
c45595_g1	2779.70938856339	11.3473392664464	7.9364	5.1205e-74	8.4428e-71
c66716_g2	1825.43274538981	22.0104008553553	6.3739	7.3024e-74	1.1664e-70
c36793_g1	3781.0889931217	63.1301358194039	5.9043	5.6709e-73	8.7837e-70
c47302_g1	245.351385255712	11359.7205529916	-5.5329	8.4505e-69	1.2704e-65
c2390_g1	637.234876461259	3.08927828498267	7.6884	1.1105e-68	1.6217e-65
c20295_g1	22442.3293096129	18.6291045021762	10.234	4.1751e-67	5.8667e-64
c61681_g1	649.043960187569	4.0335822088011	7.3301	4.2467e-67	5.8667e-64
c97291_g1	720.781395316768	5.97136036481351	6.9154	1.0369e-66	1.3947e-63
c50594_g1	1028.54859311936	13.5397262456467	6.2473	3.1802e-66	4.168e-63
c97459_g1	1428.13897472712	2.43815075984709	9.1941	1.8802e-65	2.4026e-62
c85986_g1	0.954190959709778	492.65292513021	-9.0121	6.6007e-65	8.229e-62
c33176_g1	524.1855458656	2.44717942566197	7.7428	7.5995e-65	9.2486e-62
c24898_g1	17.664005191268	8075.94548286896	-8.8367	1.276e-63	1.5167e-60
c4508_g1	1326.95318389923	24.5970372475417	5.7535	2.2779e-63	2.6462e-60
c91696_g1	456.926112882487	1.69044030829992	8.0784	9.1392e-63	1.0381e-59
c64474_g1	169.793085072398	310468.655610681	-10.836	1.348e-62	1.4978e-59
c47213_g1	50.3732457423693	2166.80277761066	-5.4268	2.4961e-62	2.7146e-59
c66751_g5	1081.26692106348	13.4464750766403	6.3294	4.2591e-62	4.5355e-59
c74330_g1	4055.67466679228	110.850833333104	5.1933	7.0196e-62	7.3224e-59
c67191_g1	5377.99776898587	150.022372149554	5.1638	7.437e-62	7.6027e-59
c66452_g1	908.895107579203	14.4388868403907	5.9761	1.1687e-61	1.1713e-58
c91828_g1	0.325996862865988	330.667225027101	-9.9863	2.8795e-60	2.8304e-57
c97584_g1	1151.16316487916	25.3621098088227	5.5043	4.0259e-59	3.8826e-56
c68043_g1	454.301921552013	3.10890968367812	7.1911	4.4721e-59	4.2331e-56
c66862_g10	527.223105972847	5.083497724846	6.6964	7.9067e-59	7.3481e-56
c67955_g1	16535.3011096223	558.535144430898	4.8878	1.2608e-58	1.1508e-55
c45707_g1	508.250090427923	5.13178918805179	6.6299	8.7333e-58	7.8315e-55
c17950_g1	578.461775610571	7.75680953245933	6.2206	1.7765e-57	1.5656e-54
c91542_g1	373.737221149553	1.77642050183094	7.7169	2.8871e-57	2.5012e-54
c74107_g1	23.8547739927445	1494.20381923139	-5.969	3.8642e-57	3.2919e-54
c43041_g1	1284.32229120916	3.75100854299882	8.4195	5.0299e-57	4.2147e-54
c97442_g1	431.073419447904	4.072845006192	6.7258	2.6857e-55	2.2142e-52
c19218_g1	6.16449317098888	468.53144266	-6.248	3.0642e-55	2.4861e-52
c97400_g1	2320.58165238417	79.349605274169	4.8701	3.8712e-55	3.0918e-52
c58594_g1	588.866788297967	9.55040852075029	5.9462	5.0046e-55	3.9355e-52
c66590_g1	63.5405964925932	118295.727921667	-10.862	5.8312e-55	4.516e-52
c63614_g1	21.1966529314473	3361.71537855985	-7.3092	1.2549e-54	9.5734e-52
c50401_g1	2.06933172706016	330.402940806234	-7.3189	1.2914e-54	9.7068e-52
c66714_g6	26.59580182684	973.357391115144	-5.1937	3.3371e-54	2.4721e-51
c67385_g1	12.8298460012241	3948.92520525956	-8.2658	3.0866e-53	2.2538e-50
c74010_g1	351.958905926444	2.72072442564937	7.0153	6.1991e-53	4.4628e-50
c52010_g1	5.05507089720868	1788.9094291983	-8.4671	8.3204e-53	5.9068e-50
c67519_g1	384.435067459364	4.09090233782178	6.5542	4.3315e-52	3.0329e-49
c66660_g2	1353.30264917634	45.7575436785714	4.8863	1.606e-51	1.1093e-48
c56844_g1	372.245228371033	3.62821846431233	6.6808	3.8637e-50	2.6332e-47
c68639_g1	255.901995448199	0.737107718666601	8.4395	4.3943e-50	2.9554e-47
c66398_g3	16.2187703134668	594.440993758611	-5.1958	7.6519e-50	5.0144e-47
c66942_g2	607.840330839169	0.339893794822961	10.804	7.5713e-50	5.0144e-47
c67765_g3	587.397257498323	14.5609816971813	5.3342	1.5053e-49	9.7397e-47
c5217_g1	30.7367994845728	929.027807468336	-4.9177	1.7219e-49	1.1001e-46
c15411_g1	328.523205805486	3.4955208746412	6.5543	2.0967e-49	1.3231e-46
c65363_g1	835.075619618537	26.1726536745264	4.9958	2.3902e-49	1.4899e-46
c61204_g2	0.264413717356393	217.583679448962	-9.6846	5.1476e-49	3.1701e-46
c15285_g1	214.276456329755	0	Inf	6.1782e-49	3.7594e-46
c97436_g1	763.841268753013	24.0474943353314	4.9893	1.3172e-48	7.921e-46
c20538_g1	249.31081846845	1.07700151348956	7.8548	1.7949e-48	1.0668e-45
c85736_g1	215.290056829595	4267.67148756951	-4.3091	3.5128e-48	2.0638e-45
c19307_g1	222.848552467176	0.330865129008074	9.3956	4.8537e-48	2.8192e-45
c79972_g1	840.405194139367	11.9451736418625	6.1366	2.2752e-47	1.3067e-44
c56287_g1	707.48479188843	10.0245739723101	6.1411	3.5631e-47	2.0236e-44
c66491_g1	239.711476506172	1.06797284767468	7.8103	3.6552e-47	2.0531e-44
c67316_g1	332.896623056518	4.77226399453338	6.1243	4.2755e-47	2.3754e-44
c61781_g1	492.719777073047	12.4128592018857	5.3109	4.5404e-47	2.4955e-44
c59213_g1	201.171296051176	0	Inf	5.8194e-47	3.1311e-44
c67102_g2	609.670717854801	18.5733584402212	5.0367	5.8045e-47	3.1311e-44
c65005_g2	391.22848108338	7.46432835567241	5.7119	8.1399e-47	4.334e-44
c67001_g2	297.513961240316	1.37017791217241	7.7625	8.8785e-47	4.6785e-44
c60201_g1	22.0063539728491	661.205501076535	-4.9091	1.9188e-46	1.0008e-43
c68360_g1	4.19452810605973	293.60560949502	-6.1292	3.9053e-46	2.0163e-43
c20541_g2	814.873390367907	1.67238297667014	8.9285	4.9749e-46	2.5429e-43
c64860_g1	382.248301333412	2.4848681559872	7.2652	5.8221e-46	2.9464e-43
c66778_g2	952.073208701826	38.0172174106761	4.6463	7.0311e-46	3.5234e-43
c38431_g1	4.22242498253271	324.525063723732	-6.2641	7.2077e-46	3.5769e-43
c29237_g1	1022.95574213306	17755.5874151044	-4.1175	8.3097e-46	4.0841e-43
c74219_g1	200.912972688607	3858.94559346034	-4.2636	1.2848e-45	6.2546e-43
c57987_g1	356.061190445256	7.07702194281341	5.6528	2.7774e-45	1.3393e-42
c67160_g4	23.0277756726452	901.838532782241	-5.2914	3.2964e-45	1.5747e-42
c51037_g1	2329.48596258172	6.03928322671475	8.5914	1.1815e-44	5.5917e-42
c66515_g1	10.4919324102293	399.622873232509	-5.2513	1.5301e-44	7.1754e-42
c67386_g4	10.1028020548618	397.378629801372	-5.2977	2.7837e-44	1.2935e-41
c67460_g1	43.1570288925054	948.612355531449	-4.4582	3.0072e-44	1.3848e-41
c66751_g2	1768.26836376482	0.368553859333301	12.228	4.1709e-44	1.9035e-41
c50225_g1	572.154444532065	20.5127106632993	4.8018	7.7501e-44	3.5057e-41
c67105_g2	1655.08440068315	87.4478433973175	4.2423	1.0567e-43	4.7379e-41
c49034_g1	313.528258402009	5.99099176350896	5.7097	1.316e-43	5.8491e-41
c74054_g1	808.541262007213	12602.4545713927	-3.9622	6.1639e-43	2.716e-40
c67033_g1	3487.63781922021	210.580915907512	4.0498	7.9638e-43	3.4792e-40
c66903_g1	622.716161129639	15.3342040791074	5.3437	8.7486e-43	3.7896e-40
c64377_g1	248.260432439587	3.45783214431597	6.1658	3.2936e-42	1.4147e-39
c56544_g1	125.742269879917	2191.46472236833	-4.1234	3.3626e-42	1.4323e-39
c68080_g1	99.2694751798601	1730.77899355596	-4.1239	5.3004e-42	2.2391e-39
c97364_g1	5840.23999964758	32.2473563426048	7.5007	1.3226e-41	5.5414e-39
c97326_g1	598.448217658545	25.7290896010903	4.5398	1.9158e-41	7.9611e-39
c65575_g1	618.448210264907	6.16952790415045	6.6473	3.4045e-41	1.4034e-38
c56844_g2	236.523052529856	3.51515227333665	6.0722	4.0727e-41	1.6654e-38
c67649_g1	3.79296420995092	236.843856240187	-5.9645	4.2229e-41	1.7131e-38
c66900_g1	0.892607814200182	176.445463315893	-7.627	5.3655e-41	2.1595e-38
c25603_g1	4335.36051102142	9.69370884330199	8.8049	1.0066e-40	4.0197e-38
c54838_g1	4288.33654954822	291.226296340416	3.8802	1.308e-40	5.1828e-38
c51890_g1	190.081755119156	1.44555537282286	7.0389	1.8203e-40	7.1572e-38
c37591_g1	1.96996506492915	1950.14927614581	-9.9512	1.94e-40	7.5697e-38
c66067_g2	154.476326318882	0	Inf	2.2574e-40	8.7411e-38
c61455_g1	31.700877084431	657.182377248541	-4.3737	3.361e-40	1.2917e-37
c66852_g1	73.8381055231257	1223.69920130051	-4.0507	5.625e-40	2.1456e-37
c45408_g1	5286.53251484934	253.379425978536	4.383	6.4511e-40	2.4425e-37
c80378_g1	276.111714171756	6.60443055831932	5.3857	1.1219e-39	4.2167e-37
c32865_g1	25.4495216910459	879.745533098812	-5.1114	1.8019e-39	6.7227e-37
c36443_g1	1340.73024614614	3.68553859333301	8.5069	2.69e-39	9.9636e-37
c66616_g3	609.384081652662	0.679787589645922	9.8081	4.3474e-39	1.5987e-36
c2274_g1	596.322392619468	29.1941927208816	4.3523	6.2536e-39	2.2832e-36
c15461_g1	3945.80963151811	51280.4873651879	-3.7	1.4897e-38	5.4003e-36
c62225_g1	327.122385193927	1.34151784766207	7.9298	1.6765e-38	6.0347e-36
c18368_g1	0.528827434712786	739.908351099862	-10.45	1.803e-38	6.4446e-36
c66751_g1	7024.0779113312	4.09090233782178	10.746	2.111e-38	7.4933e-36
c60939_g1	604.305967086373	8979.93139571243	-3.8934	3.2061e-38	1.1302e-35
c57506_g1	300.946383595058	9.21051472592733	5.0301	5.1454e-38	1.8014e-35
c79951_g1	801.992139454163	24.8205330939837	5.014	5.5234e-38	1.9206e-35
c21090_g1	309.455421106663	10.5635141516397	4.8726	1.2912e-37	4.4592e-35
c30812_g2	419.560600331024	7.6241119427882	5.7822	1.8664e-37	6.4025e-35
c66933_g1	187.752731614709	2.45620809147686	6.2563	1.9155e-37	6.5272e-35
c58904_g1	281.359857400094	0.339893794822961	9.6931	1.9958e-37	6.7557e-35
c91555_g1	281.35999919808	8.70111345627776	5.0151	2.3505e-37	7.9041e-35
c56233_g1	107.116503926154	4037.11385873356	-5.2361	2.4547e-37	8.2006e-35
c86205_g1	47.5255824055807	793.479182629903	-4.0614	4.799e-37	1.5928e-34
c80130_g1	3.25015288750492	263.080965885967	-6.3389	5.1961e-37	1.7135e-34
c63993_g3	798.951294521359	9271.4994651595	-3.5366	8.7775e-37	2.876e-34
c80182_g1	162.008724290457	1.3792065779873	6.8761	1.1938e-36	3.8865e-34
c4851_g1	139.507087353945	0.330865129008074	8.7199	1.4973e-36	4.8438e-34
c62237_g1	564.255826345898	12.6134796534581	5.4833	2.1357e-36	6.8657e-34
c66227_g1	532.139210114587	29.2474858706012	4.1854	3.5085e-36	1.1208e-33
c91875_g1	351.058883506002	13.0475034624572	4.7499	8.6021e-36	2.731e-33
c67527_g4	710.56173145665	44.4643172941151	3.9982	1.1127e-35	3.5108e-33
c68058_g1	931.040144711547	64.8165491484027	3.8444	1.3037e-35	4.0883e-33
c68854_g1	166.267240644632	2.03190817018856	6.3545	1.3875e-35	4.3246e-33
c60283_g1	2313.37178302226	14.9566215539592	7.2731	1.568e-35	4.8573e-33
c14989_g1	209.995602428441	5.12206530034098	5.3575	1.727e-35	5.3176e-33
c66653_g1	154.022140262805	1.3792065779873	6.8032	3.2641e-35	9.9906e-33
c91551_g1	299.515792029873	1.77642050183094	7.3975	3.3285e-35	1.0127e-32
c66751_g3	343.102038233174	1.03028411734945	8.3795	3.9886e-35	1.2064e-32
c68172_g1	287.422596172595	4.76166126165281	5.9156	4.1727e-35	1.2546e-32
c57610_g1	149.579587429728	1833.00719288842	-3.6152	9.5505e-35	2.8548e-32
c67318_g2	792.367395417257	56.135530199411	3.8192	1.4467e-34	4.2973e-32
c85745_g1	708.399778879436	23.5349449315505	4.9117	1.4545e-34	4.2973e-32
c92873_g1	447.047943953466	3.54381233784699	6.979	1.5072e-34	4.4276e-32
c32388_g1	323.130754591016	14.1515909733914	4.5131	1.7184e-34	5.0192e-32
c60866_g1	163.223873778572	2.50449955468265	6.0262	1.7619e-34	5.1171e-32
c80025_g1	17.2928141732316	26433.7011060615	-10.578	1.8508e-34	5.3448e-32
c57192_g1	2.11121249126635	154.740232035893	-6.1956	2.3809e-34	6.837e-32
c66762_g2	33.9435212608796	540.223930191053	-3.9923	2.8296e-34	8.0801e-32
c15329_g1	404.585515907083	10.9214652780925	5.2112	3.371e-34	9.5725e-32
c79968_g1	282.398731575131	11.3857232186676	4.6324	3.7175e-34	1.0498e-31
c86810_g1	28.0591178399591	461.716108791764	-4.0405	5.0084e-34	1.4066e-31
c91725_g1	113.30974872923	0	Inf	1.2333e-33	3.4449e-31
c64706_g1	1865.61539183093	160.124360758171	3.5424	1.4229e-33	3.9527e-31
c74074_g1	507.84697221713	5.09252639066089	6.6399	1.5278e-33	4.2212e-31
c55052_g3	121.926077200718	1505.44458604914	-3.6261	1.9669e-33	5.4052e-31
c39775_g1	66.4574127776766	7162.79735306206	-6.7519	3.5654e-33	9.7455e-31
c20525_g1	262.86740663953	3305.14595856666	-3.6523	3.8258e-33	1.0402e-30
c74161_g1	383.649175477715	4028.77265955406	-3.3925	4.5108e-33	1.2199e-30
c79888_g1	419.113453052279	25.3497493856026	4.0473	5.1752e-33	1.3922e-30
c29960_g1	726.243794201015	11.6321822212103	5.9643	5.4392e-33	1.4556e-30
c51198_g1	3.02352268676993	251.055179865615	-6.3756	6.0622e-33	1.6139e-30
c30812_g1	250.764035144441	10.5725428174546	4.5679	1.1075e-32	2.9331e-30
c66431_g5	132.199556539133	1521.45946466388	-3.5247	1.1419e-32	3.0085e-30
c47348_g1	968.628813474549	80.1347330715366	3.5954	1.2115e-32	3.1757e-30
c11157_g1	77.3312949679539	985.211398135668	-3.6713	1.246e-32	3.2495e-30
c55073_g1	1469.75255773605	26255.0646530801	-4.159	1.457e-32	3.7805e-30
c35926_g1	19.6265596176481	6742.4834871098	-8.4243	1.5949e-32	4.1172e-30
c57508_g2	289.528356400016	13.6530719219391	4.4064	1.6434e-32	4.2211e-30
c91687_g1	234.526936266177	2495.825330324	-3.4117	1.7637e-32	4.5075e-30
c85852_g1	8528.41636578136	16.7240133899753	8.9942	2.1614e-32	5.4964e-30
c51040_g1	532.590264711874	36.8672913487716	3.8526	2.2127e-32	5.5991e-30
c65005_g3	256.145922927631	10.7691362897259	4.572	2.3973e-32	6.0362e-30
c67805_g3	1598.9985338565	143.105364789141	3.482	2.9924e-32	7.4976e-30
c56704_g1	2100.19983902385	2.75841315597459	9.5725	4.9545e-32	1.2353e-29
c34429_g1	184.554133434578	0	Inf	7.7201e-32	1.9156e-29
c86600_g1	305.282053495963	0.737107718666601	8.6941	1.3727e-31	3.3895e-29
c26906_g1	2629.18082425474	63.963922326525	5.3612	1.5121e-31	3.7158e-29
c74128_g1	1991.02527249276	11.0155952922686	7.4978	1.636e-31	4.0011e-29
c66616_g5	1199.24144927651	3.83698873652984	8.2879	1.754e-31	4.2693e-29
c66200_g4	414.267981306832	8754.3160577706	-4.4014	2.0086e-31	4.8658e-29
c85796_g1	2986.74271316067	293.752249675789	3.3459	2.3063e-31	5.5606e-29
c12468_g1	833.429864504864	0.330865129008074	11.299	2.5458e-31	6.1092e-29
c66301_g3	387.710618453804	18.7241133615221	4.372	2.5955e-31	6.1993e-29
c81047_g1	117.049165124605	0.670758923831035	7.4471	2.8239e-31	6.7135e-29
c85742_g1	1479.04920076971	14280.7947451331	-3.2713	3.3159e-31	7.8468e-29
c68095_g1	1136.78939412914	102.266861537135	3.4746	3.662e-31	8.6258e-29
c67478_g2	12.4324502516936	607.963868375126	-5.6118	4.4364e-31	1.0402e-28
c68481_g1	53.3582010558973	1389.70479508618	-4.7029	4.8745e-31	1.1377e-28
c62728_g1	209.949087989508	8.2662108021089	4.6667	4.9053e-31	1.1397e-28
c43196_g1	1.28018782257577	139.228282900082	-6.765	5.7579e-31	1.3317e-28
c20105_g1	130.850233134511	0	Inf	6.2539e-31	1.4399e-28
c66973_g2	15.1956564686919	277.729549215757	-4.1919	6.4623e-31	1.4812e-28
c66558_g1	188.680735209174	6.6134592241342	4.8344	1.1169e-30	2.5487e-28
c51192_g1	234.347851790474	10.9214652780925	4.4234	1.2259e-30	2.7849e-28
c80047_g1	413.587643976725	25.2064490630509	4.0363	3.2068e-30	7.2527e-28
c58397_g2	427.631731177706	30.9541299581485	3.7882	3.5657e-30	8.0291e-28
c65603_g1	52.7612345927399	629.095796638104	-3.5757	5.1265e-30	1.1493e-27
c13065_g1	8.62550215400941	15090.0439768314	-10.773	5.2899e-30	1.1807e-27
c66933_g3	103.712882768551	0.339893794822961	8.2533	6.2849e-30	1.3967e-27
c66934_g1	3366.07914007742	42.3644862620253	6.3121	7.581e-30	1.6775e-27
c85771_g1	807.887272306286	74.3646883801914	3.4415	8.4943e-30	1.8715e-27
c5107_g1	8991.37216092709	19.103269953736	8.8786	8.8782e-30	1.9476e-27
c59213_g3	1121.1878919894	18.123546588554	5.951	1.3241e-29	2.8924e-27
c67859_g2	75.9518113822406	846.660777888344	-3.4786	1.3411e-29	2.9169e-27
c51466_g1	136.965005541092	2.81573328499527	5.6042	1.3836e-29	2.9968e-27
c20541_g1	96.5939150418785	0	Inf	1.4868e-29	3.2065e-27
c55751_g1	5139.12042010325	46380.4222708101	-3.1739	1.5671e-29	3.3656e-27
c67170_g1	242.684533272104	6.53808176348375	5.2141	1.5902e-29	3.4009e-27
c74007_g1	8.14837122465779	11131.7441131229	-10.416	1.7331e-29	3.691e-27
c37339_g1	1776.92761267926	186.621255318094	3.2512	1.9784e-29	4.1959e-27
c67082_g5	41.527828434796	780.305276728017	-4.2319	3.1335e-29	6.6185e-27
c74080_g1	146.784816450325	0	Inf	3.8171e-29	8.0292e-27
c67391_g2	201.704433430454	9.01392125365606	4.4839	5.2442e-29	1.0986e-26
c42736_g1	297.014205200159	19.6627203769309	3.917	6.5076e-29	1.3577e-26
c66091_g1	1031.6755276171	103.491653461068	3.3174	8.178e-29	1.6992e-26
c40674_g1	123.405122779294	2.03190817018856	5.9244	9.2587e-29	1.916e-26
c20535_g1	1015.91416048856	9.12925673359334	6.7981	1.3327e-28	2.7467e-26
c56735_g1	14.505808327345	248.934695355606	-4.1011	1.4363e-28	2.9483e-26
c66232_g1	301.878471038551	20.7815334620897	3.8606	2.003e-28	4.0952e-26
c15463_g1	1407.61441936755	3.82638600364927	8.5231	2.0172e-28	4.1079e-26
c55052_g1	101.49157958564	1006.81294405345	-3.3104	2.53e-28	5.1317e-26
c37548_g1	109.894389622264	0.368553859333301	8.22	2.844e-28	5.7457e-26
c67045_g1	4442.26786954385	523.175697867236	3.0859	2.9474e-28	5.9313e-26
c58149_g2	765.275469269697	6485.56089137287	-3.0832	3.4736e-28	6.9627e-26
c68556_g1	142.884020885656	4.24165725912268	5.0741	3.6445e-28	7.2767e-26
c46174_g1	4.30780775693049	220.781533837029	-5.6795	4.3284e-28	8.6085e-26
c65809_g1	12.3691749612051	227.600007738584	-4.2017	5.5138e-28	1.0924e-25
c46603_g1	1247.73609739016	133.68886067858	3.2224	6.3074e-28	1.2352e-25
c56347_g1	18.6666501643681	1550.37695514665	-6.376	6.2653e-28	1.2352e-25
c66216_g1	8.72486881614041	181.376544291141	-4.3777	6.3052e-28	1.2352e-25
c52629_g1	9781.27279117817	1178.83531191434	3.0527	8.81e-28	1.7188e-25
c61218_g1	462.098773375132	40.4916664570566	3.5125	9.6399e-28	1.8735e-25
c64877_g1	243.006756617547	3.93945219462495	5.9469	1.0726e-27	2.0768e-25
c62830_g1	84.178992132112	0	Inf	1.0801e-27	2.0833e-25
c64736_g1	255.278824253547	16.1128438841265	3.9858	1.4084e-27	2.7064e-25
c47252_g2	8.96131475803037	181.930577291243	-4.3435	1.5242e-27	2.918e-25
c66431_g6	40.9291524604106	1502.30482455121	-5.1979	1.6458e-27	3.1389e-25
c57020_g1	118.933193621745	2.46681082435743	5.5914	2.2258e-27	4.2294e-25
c13104_g1	693.644382079525	70.3394396153093	3.3018	2.3736e-27	4.4935e-25
c42723_g1	18.1294864364989	580.110755698931	-4.9999	2.8763e-27	5.425e-25
c43056_g1	100.006014290625	933.668438577682	-3.2228	2.8898e-27	5.4304e-25
c60424_g2	2.43720935413234	114.023591527371	-5.548	4.6036e-27	8.6194e-25
c16456_g1	146.432756653952	5.25388404484236	4.8007	5.8603e-27	1.0932e-24
c66976_g7	845.841562288909	6609.05613750146	-2.966	6.3437e-27	1.1791e-24
c74318_g1	211.144216767848	7.97460847049173	4.7267	8.1236e-27	1.5045e-24
c65768_g1	992.859004132344	109.157109757431	3.1852	8.1779e-27	1.5091e-24
c65357_g1	674.829928605885	68.5060269598059	3.3002	8.4742e-27	1.5581e-24
c69992_g1	107.589537607921	1.73873177150571	5.9514	8.6567e-27	1.5859e-24
c86724_g1	246.313770710592	16.2462366956936	3.9223	8.9012e-27	1.6249e-24
c52644_g2	22.0875686006686	290.978088866366	-3.7196	9.1899e-27	1.6716e-24
c40368_g1	97.0062203337498	1.03931278316434	6.5444	1.0344e-26	1.8749e-24
c50277_g1	2.27216229890695	107.040699598734	-5.5579	1.5949e-26	2.8806e-24
c67122_g1	208.93003665982	11.8032637631026	4.1458	1.6577e-26	2.9834e-24
c86048_g1	91.5586174249667	0.661730258016148	7.1123	2.04e-26	3.6587e-24
c47288_g1	100.275220846944	984.505363004527	-3.2954	2.1241e-26	3.7961e-24
c80095_g1	326.665081077617	1.07700151348956	8.2446	3.1025e-26	5.5256e-24
c66127_g1	479.836294992004	3735.0031089913	-2.9605	3.3627e-26	5.9681e-24
c47337_g1	117.36351230335	1020.12255942788	-3.1197	3.9476e-26	6.9818e-24
c91567_g1	5.93369482367564	3219.38254225358	-9.0836	3.9642e-26	6.9871e-24
c13091_g1	840.673697168923	6409.68413977885	-2.9306	5.5649e-26	9.7747e-24
c21723_g1	2.63594267839435	108.460231442556	-5.3627	5.7369e-26	1.0042e-23
c21723_g2	0.264413717356393	79.5093495900853	-8.2322	6.2237e-26	1.0857e-23
c50334_g1	333.254901607108	25.6636196514245	3.6988	8.4522e-26	1.4695e-23
c97730_g1	49.8444183076565	571.773671489647	-3.5199	1.1536e-25	1.9988e-23
c66572_g1	5527.37108285685	5.13021512098611	10.073	1.4523e-25	2.5078e-23
c67758_g1	765.46951935418	84.7519356801512	3.175	1.4598e-25	2.5123e-23
c60713_g1	982.514757496818	29630.9296195781	-4.9145	1.4968e-25	2.5673e-23
c67071_g1	120.770872245878	3.50612360752176	5.1063	1.5111e-25	2.5832e-23
c63940_g2	2610.43256886257	349.570655276351	2.9006	1.7794e-25	3.0318e-23
c66560_g1	236.477929273679	17.3645381822303	3.7675	1.846e-25	3.1348e-23
c59175_g1	970.472527821025	10.7896465335911	6.491	2.773e-25	4.6933e-23
c91712_g1	661.699809012888	4775.55871131384	-2.8514	2.9063e-25	4.9027e-23
c68070_g1	6498.97332019929	836.375938573656	2.958	3.1392e-25	5.2781e-23
c80038_g1	323.736504075232	28.7216013363875	3.4946	3.2495e-25	5.4457e-23
c91967_g1	618.521158064567	70.1473847209612	3.1404	4.7351e-25	7.9094e-23
c91823_g1	827.396180860369	99.7457343658136	3.0523	5.1208e-25	8.5259e-23
c51526_g1	37.4638772583045	375.750910137742	-3.3262	6.8171e-25	1.1313e-22
c9508_g1	14.5075004723239	332.284837767049	-4.5175	7.8133e-25	1.2924e-22
c74149_g1	1148.86783161144	147.709087915249	2.9594	1.008e-24	1.662e-22
c64343_g1	1302.22678859085	9272.50925204038	-2.832	1.2245e-24	2.0124e-22
c67006_g6	12.6491938122801	203.713407948844	-4.0094	1.3238e-24	2.1688e-22
c51933_g1	12.7485604744111	2252.27903574569	-7.4649	1.3623e-24	2.2247e-22
c66390_g3	5045.95075999087	711.292583132154	2.8266	1.6933e-24	2.7564e-22
c61636_g1	159.302950438639	4.11956240233212	5.2731	1.7134e-24	2.7803e-22
c68094_g1	99.5406039443876	2.03190817018856	5.6144	1.8749e-24	3.0327e-22
c63717_g1	120.864165919472	955.96631668727	-2.9836	2.5602e-24	4.1281e-22
c20114_g1	33.9058086432516	341.050030729201	-3.3304	3.1522e-24	5.0667e-22
c37489_g1	111.012289987187	11577.0849863586	-6.7044	3.2808e-24	5.2405e-22
c62429_g1	1511.61271568911	3.82638600364927	8.6259	3.2808e-24	5.2405e-22
c12851_g1	243.096250038086	20.3538059213533	3.5782	4.7657e-24	7.5886e-22
c79952_g1	2551.48148208788	358.985587555887	2.8293	5.6598e-24	8.9843e-22
c5370_g1	7.11458688311387	412.936419724193	-5.859	6.8272e-24	1.0804e-21
c66716_g5	51.7167088554335	451.787934122592	-3.1269	8.7832e-24	1.3856e-21
c60318_g1	3173.4765928056	21439.3200275329	-2.7561	9.1732e-24	1.4427e-21
c57437_g1	11.3648378431261	10428.0624397003	-9.8417	9.6561e-24	1.514e-21
c91632_g1	1360.55585378313	14.9475928881443	6.5081	1.0876e-23	1.7001e-21
c57309_g1	74.1246976233849	0.368553859333301	7.6519	1.6114e-23	2.5111e-21
c97379_g1	6068.73746442935	914.193815439365	2.7308	2.0636e-23	3.2061e-21
c52695_g1	39.7647911892985	379.08946758405	-3.253	2.0984e-23	3.2502e-21
c91574_g2	1416.70598582951	41.5657519497202	5.091	2.1863e-23	3.3761e-21
c17946_g1	0	136.346520694788	-Inf	2.3004e-23	3.5416e-21
c47173_g1	775.918965108065	5631.0281767175	-2.8594	2.4239e-23	3.7206e-21
c74068_g1	1973.02660345665	282.738683458364	2.8029	3.0125e-23	4.6102e-21
c52098_g1	2138.76156147762	304.453232108328	2.8125	3.1207e-23	4.7616e-21
c61615_g1	1225.82057735586	3.09830695079756	8.6281	3.7157e-23	5.6525e-21
c65204_g1	1599.445840238	226.816093744526	2.818	4.0906e-23	6.2044e-21
c43368_g1	0	86.4942786943789	-Inf	4.6446e-23	7.0238e-21
c15353_g1	23.2618165119292	244.875321731109	-3.396	5.251e-23	7.9175e-21
c57419_g1	420.823864170115	2837.44955927685	-2.7533	5.2816e-23	7.9401e-21
c75824_g1	2.00774858155056	86.482334007738	-5.4288	5.4161e-23	8.1184e-21
c60002_g1	77.5439948137	1031.90742179722	-3.7342	5.6929e-23	8.5083e-21
c53444_g1	235.915965395628	1631.41116158983	-2.7898	5.8615e-23	8.7348e-21
c58904_g2	152.17486256219	0	Inf	6.8869e-23	1.0233e-20
c47220_g1	324.81462384864	4.85667012099872	6.0635	7.2353e-23	1.072e-20
c20227_g1	16578.6414236003	2544.38860056048	2.7039	7.5745e-23	1.119e-20
c60832_g1	7.95542729295942	285.072293195241	-5.1632	1.0099e-22	1.4876e-20
c97335_g1	4756.60538076388	731.078411226268	2.7018	1.0816e-22	1.5887e-20
c66312_g2	70.4097055492827	556.723384148123	-2.9831	1.1996e-22	1.7569e-20
c57193_g1	1076.62608279523	1.00162405283911	10.07	1.2556e-22	1.8337e-20
c66717_g4	1887.85428039795	12034.8820825477	-2.6724	1.4831e-22	2.1598e-20
c97673_g1	69.717310507343	1159.19793816733	-4.0555	1.8499e-22	2.6862e-20
c74393_g1	516.136527904516	64.9511002904563	2.9903	2.0973e-22	3.0368e-20
c59269_g1	63.2968108111477	0	Inf	2.536e-22	3.6617e-20
c74907_g1	215.983465791385	0	Inf	3.0753e-22	4.4279e-20
c67496_g1	110.332399384982	778.12178439941	-2.8181	3.1925e-22	4.5837e-20
c21298_g1	4497.07222975964	704.929514027821	2.6734	3.328e-22	4.7649e-20
c53507_g1	162.770383313873	1.40786664249764	6.8532	3.7914e-22	5.4133e-20
c37799_g1	40.8872716962044	357.009889674264	-3.1262	3.9063e-22	5.5617e-20
c66059_g1	28.124869132047	423.475635748763	-3.9124	4.0527e-22	5.7541e-20
c86770_g1	798.19738286943	111.15386987076	2.8442	4.1165e-22	5.8286e-20
c59275_g1	160.566448308653	10.9810546960747	3.8701	4.4012e-22	6.2144e-20
c60318_g2	1834.82862271847	11465.6835688817	-2.6436	5.0399e-22	7.0966e-20
c61183_g3	61.1610148343726	464.320714754349	-2.9244	5.3811e-22	7.5563e-20
c20217_g1	494.462381613365	3249.02192194951	-2.7161	6.0363e-22	8.4531e-20
c36870_g1	86.9782723545037	2.14497436116424	5.3416	6.3028e-22	8.8022e-20
c64980_g1	25.8804619116261	257.204150153889	-3.313	6.6191e-22	9.2187e-20
c62921_g2	151.061126376152	1021.5122949431	-2.7575	8.5857e-22	1.1925e-19
c56154_g1	2.54067326384814	224.200789187018	-6.4634	9.3865e-22	1.3002e-19
c22064_g1	246.679314134052	1618.87795025273	-2.7143	9.5005e-22	1.3125e-19
c64592_g1	193.761439678236	16.4389868119376	3.5591	1.0454e-21	1.4403e-19
c67848_g1	3464.78414757762	562.281368317085	2.6234	1.0938e-21	1.5029e-19
c79937_g1	1354.9592769532	203.226649960758	2.7371	1.1122e-21	1.5241e-19
c85807_g1	1004.22728382735	6189.74278318656	-2.6238	1.3838e-21	1.8912e-19
c47213_g2	0.954190959709778	79.0996793809787	-6.3733	1.4667e-21	1.9992e-19
c80415_g1	192.063369868206	1260.48170893941	-2.7143	1.6192e-21	2.2012e-19
c66049_g13	12.2098463995499	161.18543797773	-3.7226	1.6645e-21	2.2567e-19
c61321_g1	299.581171460744	34.2521785153487	3.1287	2.2759e-21	3.0775e-19
c56737_g1	14.325156138401	464.032868017528	-5.0176	2.8722e-21	3.8737e-19
c4628_g1	513.205861594301	24.4823969895003	4.3897	3.083e-21	4.1469e-19
c80307_g1	276.00130515164	30.7054016666441	3.1681	3.1116e-21	4.1744e-19
c79975_g1	1981.98114157642	3.47588947594574	9.1553	3.1312e-21	4.1898e-19
c73993_g1	512.71856439652	3146.8455906387	-2.6177	3.8397e-21	5.1244e-19
c15358_g1	122.731021569652	7.34241712215568	4.0631	4.0357e-21	5.3719e-19
c65335_g1	631.162684439437	42.5822852000577	3.8897	4.2104e-21	5.5899e-19
c12573_g1	41.9252241843266	345.210429995989	-3.0416	4.3095e-21	5.6773e-19
c67718_g1	8102.29677422977	1349.36622451383	2.586	4.307e-21	5.6773e-19
c74438_g1	2212.32036684329	7.20069086666966	8.2632	4.3011e-21	5.6773e-19
c59298_g6	1604.6115819601	1.04834144897922	10.58	4.4468e-21	5.8431e-19
c60584_g2	40.1933263072728	910.269326797042	-4.5013	4.7788e-21	6.2632e-19
c8890_g1	351.725294448813	2614.2074265914	-2.8939	5.4468e-21	7.1204e-19
c64609_g3	58.6408278084484	0	Inf	5.5652e-21	7.2567e-19
c14373_g1	217.041620921457	1356.97414301423	-2.6443	6.0256e-21	7.837e-19
c74217_g1	74.5349389090608	919.404696175624	-3.6247	6.1326e-21	7.9559e-19
c5323_g1	224.910668886418	22.9470180671191	3.293	7.459e-21	9.6521e-19
c32714_g1	56.9640280929626	0	Inf	7.536e-21	9.7272e-19
c43046_g1	983.660799633998	3.04256088884256	8.3367	8.0956e-21	1.0423e-18
c57658_g1	910.678136203667	140.388155744171	2.6975	8.4285e-21	1.0824e-18
c60577_g1	78.277132268258	0.992595387024222	6.3012	8.5262e-21	1.0923e-18
c57087_g1	863.492103753035	132.221125132784	2.7072	8.9169e-21	1.1394e-18
c60306_g1	1537.5880535473	247.503449820429	2.6351	9.0994e-21	1.1599e-18
c55555_g1	219.687542472935	5.73619931704726	5.2592	9.6702e-21	1.2296e-18
c50734_g1	335.843758686929	42.1042763924706	2.9958	9.9677e-21	1.2642e-18
c51037_g2	234.019024431042	2.09825696502412	6.8013	1.1277e-20	1.4246e-18
c97563_g1	1598.10711246346	258.058351042833	2.6306	1.1288e-20	1.4246e-18
c54972_g1	4558.87707901507	17.5710391654862	8.0193	1.448e-20	1.823e-18
c92214_g1	1.58238505655357	72.452422154558	-5.5169	1.526e-20	1.9165e-18
c66629_g1	102.09088025241	4.89435885132395	4.3826	1.6299e-20	2.042e-18
c73995_g1	3120.24062268244	20256.1147495452	-2.6986	1.6501e-20	2.0622e-18
c47146_g1	741.594577390501	1.71910037281026	8.7528	1.6795e-20	2.0938e-18
c40041_g1	476.227384627204	66.0490277843902	2.85	1.9633e-20	2.4416e-18
c74140_g1	251.281489989619	9551.65376259748	-5.2484	2.2001e-20	2.7295e-18
c55127_g1	74.6996448678756	1.1056615779999	6.0781	2.5156e-20	3.1133e-18
c47886_g1	263.849192079493	1943.53309821504	-2.8809	2.6258e-20	3.2419e-18
c65778_g1	2.73530934052535	79.5732454726855	-4.8625	2.7091e-20	3.3367e-18
c12320_g1	286.641842094011	34.4004805244141	3.0587	2.9704e-20	3.6497e-18
c13112_g1	7148.00807963441	1246.57320007519	2.5196	3.0017e-20	3.6793e-18
c58654_g1	180.530600940543	17.4112555783704	3.3742	3.6468e-20	4.4594e-18
c91529_g1	197.142010331073	1.41689530831252	7.1204	3.8272e-20	4.6688e-18
c66897_g5	1169.67920257163	6663.20995885608	-2.5101	3.9141e-20	4.7635e-18
c37186_g1	2523.29152356084	364.546311105193	2.7911	5.067e-20	6.1518e-18
c40868_g1	31.8438875547405	258.99515299589	-3.0238	5.1719e-20	6.2495e-18
c51527_g1	274.812573091999	1610.65383050761	-2.5511	5.1666e-20	6.2495e-18
c74036_g1	272.721438810945	1639.65613910985	-2.5879	5.3051e-20	6.3954e-18
c81450_g1	55.0983643271141	0	Inf	5.6413e-20	6.7846e-18
c65719_g1	109.275298308948	1592.62607939026	-3.8654	6.7611e-20	8.1124e-18
c91605_g1	98.9838087342084	4.83861278936894	4.3545	8.1668e-20	9.7761e-18
c97376_g1	45.3676080459028	10725.9423770157	-7.8852	8.352e-20	9.9743e-18
c63752_g1	3.28793640412633	82.4250934209403	-4.6478	9.0677e-20	1.0804e-17
c59219_g1	1110.81785774666	6198.82953540761	-2.4804	1.1477e-19	1.3643e-17
c66572_g2	3288.45453289464	7.27361541508467	8.8205	1.2102e-19	1.4353e-17
c66751_g4	121.589126245109	0	Inf	1.3624e-19	1.612e-17
c21792_g1	91.6122361385363	605.151691978049	-2.7237	1.3719e-19	1.6195e-17
c67885_g5	208.4432317873	21.9090957277466	3.2501	1.4648e-19	1.7252e-17
c66096_g3	715.456740600334	61.9080762930231	3.5307	1.4813e-19	1.7406e-17
c91651_g1	1260.51381752437	211.496008896999	2.5753	1.5946e-19	1.8695e-17
c67493_g3	2875.08255746015	509.551358802275	2.4963	1.6249e-19	1.9005e-17
c64609_g4	53.2934463174104	0	Inf	1.6424e-19	1.9167e-17
c42725_g1	65.4655092003389	1.03028411734945	5.9896	1.7836e-19	2.0767e-17
c64349_g1	18.4695380860915	260.190078034795	-3.8163	1.8219e-19	2.1165e-17
c62699_g2	474.961038894375	70.1607198513939	2.7591	1.8929e-19	2.1939e-17
c65028_g1	2847.43011071604	514.961717746403	2.4671	1.9381e-19	2.2412e-17
c79995_g1	264.965440433626	22.8853914734806	3.5333	1.9424e-19	2.2412e-17
c66008_g1	166.623805716302	981.36754605943	-2.5582	2.3213e-19	2.6724e-17
c50962_g1	11.257347584819	132.073518345614	-3.5524	2.4935e-19	2.8641e-17
c64724_g2	9155.14578127581	1675.99814891299	2.4496	2.7078e-19	3.1033e-17
c61038_g1	971.201037064028	2.71169575983448	8.4844	2.7733e-19	3.1712e-17
c85929_g1	4234.31362053644	765.087744217836	2.4684	2.8742e-19	3.2792e-17
c74092_g1	837.380237601958	5264.24057279629	-2.6523	2.9649e-19	3.3752e-17
c67965_g1	610.104724036867	96.0830711673503	2.6667	3.1161e-19	3.5395e-17
c51543_g1	7948.29521567472	41985.7826522476	-2.4012	3.3374e-19	3.7824e-17
c7912_g1	461.818722325254	14.690531152721	4.9744	3.6843e-19	4.1663e-17
c65872_g1	108166.378507491	6288.43294876188	4.1044	3.7375e-19	4.2172e-17
c80006_g1	1661.11532396467	8519.81897808221	-2.3587	3.7893e-19	4.2662e-17
c47278_g1	199.342379114161	20.6282297665104	3.2726	3.8017e-19	4.2708e-17
c67662_g4	82.5949684633239	3.13756974818846	4.7183	3.9539e-19	4.432e-17
c64587_g1	8.44068181848716	117.880491147913	-3.8038	4.5104e-19	5.0447e-17
c91921_g1	5000.23791188585	4.88533018550906	9.9993	4.5695e-19	5.0997e-17
c66845_g5	59.3174050196891	0.661730258016148	6.4861	4.6211e-19	5.146e-17
c66129_g1	624.425441831272	3377.92875955722	-2.4355	4.787e-19	5.3191e-17
c62224_g5	164.665224105769	16.2333646738514	3.3425	5.1769e-19	5.74e-17
c61091_g1	70.5402824788509	452.743351259893	-2.6822	6.2084e-19	6.8688e-17
c59883_g1	6.09302338533085	100.523128079115	-4.0442	6.8711e-19	7.5855e-17
c55860_g1	50.4859715998491	358.660795800668	-2.8287	7.0118e-19	7.7241e-17
c97323_g1	823.856569209543	4457.16584355879	-2.4357	7.1389e-19	7.8473e-17
c57571_g1	1717.58405932881	120.819198134869	3.8295	7.4755e-19	8.1996e-17
c65003_g1	13.0228608319159	184.413919870196	-3.8238	8.5562e-19	9.365e-17
c63434_g1	173.797304412595	1000.18663710991	-2.5248	9.3408e-19	1.0202e-16
c66762_g1	31.5063828057407	244.541915928635	-2.9564	1.0171e-18	1.1085e-16
c53489_g1	67.6194398451762	423.379739943435	-2.6464	1.1178e-18	1.2157e-16
c67526_g1	422.485700810516	64.0679598516858	2.7212	1.5199e-18	1.6494e-16
c15295_g1	984.67712063544	170.666717934081	2.5285	1.613e-18	1.7467e-16
c91949_g1	38.5970991609729	278.148663827257	-2.8493	1.6746e-18	1.8096e-16
c58782_g1	86.982440501082	4.05321360749655	4.4236	1.6985e-18	1.8316e-16
c70614_g1	0.689777242353385	54.5870482599024	-6.3063	1.7223e-18	1.8533e-16
c62692_g1	22.4472517325712	286.840563876426	-3.6756	1.7455e-18	1.8743e-16
c79985_g1	6.42311749578163	362.753231816336	-5.8196	1.9622e-18	2.1026e-16
c14483_g1	2255.64551089042	41.7552580697899	5.7554	2.1636e-18	2.3136e-16
c64386_g1	250.701367180088	32.4620071465058	2.9491	2.203e-18	2.3508e-16
c74093_g1	141.026388483049	827.48448640613	-2.5528	2.3969e-18	2.5524e-16
c21296_g1	669.304401630826	21.2032846090997	4.9803	2.4463e-18	2.5996e-16
c75376_g1	29.5182657065001	229.352170502565	-2.9579	2.4669e-18	2.6161e-16
c74013_g1	1136.24511272807	204.653915888646	2.473	2.7017e-18	2.8591e-16
c47243_g1	217.404617444324	24.896789399804	3.1264	2.8552e-18	3.0153e-16
c80373_g1	800.120505797573	140.054007347789	2.5142	2.89e-18	3.0458e-16
c63933_g1	23.3594201300879	197.359278631074	-3.0787	3.3264e-18	3.4985e-16
c65694_g3	96.0826684818371	1.43652670700798	6.0636	3.6787e-18	3.861e-16
c56727_g1	56.7225592488804	0.670758923831035	6.402	3.7524e-18	3.9303e-16
c43045_g1	79.1231373782828	3.42917207980563	4.5282	3.842e-18	4.0159e-16
c21564_g1	837.173055517361	4387.4736120809	-2.3898	4.0371e-18	4.2113e-16
c56478_g1	2664.92801273272	24629.7765736279	-3.2082	4.2752e-18	4.4415e-16
c68170_g1	20.7097062609407	177.279896554878	-3.0976	4.2731e-18	4.4415e-16
c39765_g3	76.2604227011665	472.054561130708	-2.6299	4.4839e-18	4.6489e-16
c67326_g2	5.89019281348406	771.236273349075	-7.0327	4.5382e-18	4.6957e-16
c64550_g1	124.98186024127	713.714378777888	-2.5136	4.6035e-18	4.7536e-16
c91738_g1	133.359337668263	12.1244050043999	3.4593	4.6908e-18	4.834e-16
c8025_g1	2640.16577638549	526.239453884988	2.3268	5.3288e-18	5.4804e-16
c62185_g1	125.044227243401	717.626991053957	-2.5208	5.4289e-18	5.5722e-16
c67947_g1	339.886905297024	50.7967769195127	2.7422	5.5759e-18	5.7116e-16
c74056_g1	222.573167290827	3.81735733783438	5.8656	5.6061e-18	5.731e-16
c68261_g1	188.6913174407	22.0056786541582	3.1001	5.8174e-18	5.9351e-16
c92083_g1	168.230578927633	948.833597172533	-2.4957	6.0457e-18	6.1557e-16
c60346_g1	838.005051376536	4270.34118478034	-2.3493	6.2768e-18	6.3784e-16
c91928_g1	1328.81212169156	13.0687089282183	6.6679	6.337e-18	6.4268e-16
c15384_g1	1831.57021093819	351.95371816098	2.3796	6.4057e-18	6.4836e-16
c4768_g1	138.122864462013	761.706912091268	-2.4633	6.6586e-18	6.7263e-16
c68191_g1	264.664431116288	4.0335822088011	6.036	7.0559e-18	7.1135e-16
c68163_g1	12582.740474185	2474.69647500682	2.3461	7.2687e-18	7.3136e-16
c66490_g3	237.692361836475	5578.24944845805	-4.5526	7.5061e-18	7.5377e-16
c62846_g1	410.918373491954	64.887899629752	2.6628	7.5644e-18	7.5813e-16
c53526_g1	121.210844350993	0.368553859333301	8.3614	8.4698e-18	8.4721e-16
c66895_g1	316.587120802604	1570.17294230589	-2.3102	8.4976e-18	8.4834e-16
c12607_g1	400.15501428445	2150.55100444541	-2.4261	9.1669e-18	9.1336e-16
c61590_g1	142.088286365739	4.4971449274803	4.9816	9.6165e-18	9.563e-16
c68302_g1	824.973529421603	2.82476195081016	8.1901	1.0001e-17	9.9263e-16
c8642_g1	115.516284167787	4.10895966945155	4.8132	1.0558e-17	1.0458e-15
c40066_g1	149.196959424551	830.883313408713	-2.4774	1.0885e-17	1.0762e-15
c64025_g1	19.4894803378892	168.813992636398	-3.1147	1.1056e-17	1.0909e-15
c27173_g1	3.97771364647971	86.9452973665641	-4.4501	1.1535e-17	1.136e-15
c65193_g1	454.472280507094	22.6658348451087	4.3256	1.2793e-17	1.2575e-15
c39943_g1	271.290666747582	1511.37787311744	-2.478	1.33e-17	1.3048e-15
c21461_g1	352.313282560181	54.0586623234218	2.7043	1.3578e-17	1.3295e-15
c45200_g1	46.2544264675393	0	Inf	1.4783e-17	1.4448e-15
c66137_g1	691.738320965161	3471.96308616868	-2.3275	1.6639e-17	1.623e-15
c98076_g1	466.437666967762	78.7413125179468	2.5665	1.7049e-17	1.6599e-15
c85823_g1	3083.99549555946	2.47583949017231	10.283	1.7165e-17	1.668e-15
c67725_g2	78.3529828974747	1.40786664249764	5.7984	1.7733e-17	1.72e-15
c65543_g1	500.892070924334	2583.35407284259	-2.3667	1.8676e-17	1.808e-15
c64124_g1	466.240621820786	2343.80928177827	-2.3297	1.8792e-17	1.8158e-15
c66824_g2	66.7613730556267	2.09825696502412	4.9918	1.9279e-17	1.8593e-15
c98775_g1	73.987476545639	3.05158955465744	4.5996	1.9396e-17	1.867e-15
c50478_g1	2.23847602987033	66.7992870102157	-4.8992	2.0908e-17	2.0088e-15
c64273_g1	201.697377286873	1054.70136018125	-2.3866	2.1811e-17	2.0917e-15
c54944_g1	1591.08949000787	7619.32083194996	-2.2596	2.2657e-17	2.1687e-15
c97617_g1	545.8805115557	94.7476659646771	2.5264	2.3562e-17	2.2511e-15
c67506_g2	507.00075694382	89.3619631753334	2.5043	2.4892e-17	2.3737e-15
c63257_g1	221.968790189121	30.658684270504	2.856	2.704e-17	2.5738e-15
c85866_g1	171.429301539502	20.2603711290731	3.0809	2.7127e-17	2.5772e-15
c91557_g1	761.552163670376	138.774811315662	2.4562	2.7383e-17	2.5967e-15
c67968_g1	4421.68591777426	900.928801743024	2.2951	3.0202e-17	2.8588e-15
c39766_g1	2172.02599848804	427.202706428449	2.346	3.1649e-17	2.9903e-15
c46830_g1	128.94218834381	691.938858366962	-2.4239	3.1757e-17	2.9948e-15
c43232_g1	427.106627695365	47.3434348630884	3.1734	3.4151e-17	3.2148e-15
c64496_g1	372.766518201763	1861.0669784416	-2.3198	3.8325e-17	3.601e-15
c43007_g1	1110.6785794984	5238.79014506975	-2.2378	4.5464e-17	4.264e-15
c92539_g1	114.230949011281	10.1286114974709	3.4954	4.5894e-17	4.2963e-15
c63666_g1	1100.21064854918	212.357432271386	2.3732	4.6547e-17	4.3416e-15
c74747_g1	1220.54157041967	1.3792065779873	9.7895	4.6468e-17	4.3416e-15
c47645_g1	75.5264304909945	437.788575157504	-2.5352	4.8405e-17	4.5067e-15
c43154_g1	1633.77290975698	327.126185476026	2.3203	4.8871e-17	4.5418e-15
c60025_g1	398.462920866549	1973.46143402889	-2.3082	5.3279e-17	4.9425e-15
c66888_g1	30.3199140507192	216.071263682682	-2.8332	5.6429e-17	5.2252e-15
c57913_g1	941.74780279482	180.724393568761	2.3815	6.0216e-17	5.5658e-15
c39766_g2	19036.2563558944	4051.15971459619	2.2323	6.5545e-17	6.0474e-15
c79992_g1	1001.71387475072	193.12239206318	2.3749	6.7351e-17	6.2028e-15
c3068_g1	191.117873664312	25.1687603327257	2.9248	7.0427e-17	6.4745e-15
c38041_g1	217.508280652464	1128.82077682373	-2.3757	7.3003e-17	6.6992e-15
c58589_g1	188.508401947137	24.1899158127134	2.9622	7.7245e-17	7.0758e-15
c60771_g1	679.172116789233	3335.04936723073	-2.2959	8.7399e-17	7.9916e-15
c45730_g1	353.682839371558	1763.17879905141	-2.3177	8.8947e-17	8.1187e-15
c80200_g1	392.709222774627	65.7058022321621	2.5794	9.037e-17	8.2338e-15
c47324_g1	3702.41454924317	3.46686081013086	10.061	9.1705e-17	8.3406e-15
c61651_g2	111.128812130029	2.12534296246879	5.7084	1.0046e-16	9.121e-15
c50360_g1	7.20406690509644	205.212534838683	-4.8322	1.0115e-16	9.1671e-15
c59298_g3	328.617929362026	0.368553859333301	9.8003	1.1092e-16	1.0035e-14
c91748_g1	278.507242060106	1399.91059720747	-2.3295	1.1923e-16	1.0767e-14
c97598_g1	88.1172836497357	5.84926550802294	3.9131	1.5535e-16	1.4005e-14
c91758_g1	78.4905624378803	445.302586538194	-2.5042	1.7329e-16	1.5595e-14
c66117_g2	346.36369503912	1666.48035475843	-2.2664	1.7696e-16	1.5897e-14
c63112_g1	1867.31268721521	9154.78485629197	-2.2936	1.9622e-16	1.7596e-14
c97418_g1	1234.62379126876	250.455676679111	2.3014	2.2325e-16	1.9985e-14
c63145_g1	51.699553374723	313.416999127564	-2.5999	2.2815e-16	2.0388e-14
c52550_g1	24.7333270202179	47291.4251129055	-10.901	2.3857e-16	2.1282e-14
c50218_g1	190.65844804137	932.410852293023	-2.29	2.5189e-16	2.2396e-14
c67082_g4	7.70909471092104	104.233946489522	-3.7571	2.5194e-16	2.2396e-14
c73971_g1	127.038633995851	13.2908143308685	3.2568	2.746e-16	2.4368e-14
c58172_g1	1114.39583487712	71.2269823807405	3.9677	2.8817e-16	2.5528e-14
c64815_g1	5.75876112830182	82.8363376971126	-3.8464	3.0844e-16	2.7276e-14
c61483_g1	1249.37941917012	45.8848723351811	4.767	3.169e-16	2.7976e-14
c79969_g1	262.719032170618	1236.46579879023	-2.2346	3.1891e-16	2.8105e-14
c97696_g1	4.08117755619551	439.293354937802	-6.7501	3.2799e-16	2.8855e-14
c86019_g1	16.9110235574196	140.516691221299	-3.0547	3.5461e-16	3.1144e-14
c92523_g1	1120.49662592967	227.462308462399	2.3004	3.5829e-16	3.1412e-14
c45662_g1	105.959340596611	9.61990544971721	3.4613	3.6518e-16	3.1962e-14
c42898_g1	45.1096257797436	0.330865129008074	7.091	3.6969e-16	3.2257e-14
c65635_g1	33.9971935071934	216.834762176897	-2.6731	3.6981e-16	3.2257e-14
c65936_g3	230.432947906335	33.2318019089838	2.7937	3.7357e-16	3.2529e-14
c52123_g1	768.920723837307	151.263047978198	2.3458	4.159e-16	3.6154e-14
c57501_g1	398.557197695187	1878.72334296794	-2.2369	4.2296e-16	3.6705e-14
c67848_g2	331.368874601076	10.7526530251618	4.9457	4.2643e-16	3.6943e-14
c64726_g2	7217.69087448022	1584.99747920611	2.1871	4.4455e-16	3.8448e-14
c85847_g1	1759.68954354514	266.377575509344	2.7238	4.526e-16	3.9078e-14
c74172_g1	139.185170372415	1.03931278316434	7.0652	4.6886e-16	4.0413e-14
c66158_g1	72.4784661167027	842.700817685894	-3.5394	4.7293e-16	4.0696e-14
c64804_g2	156.360195651787	1727.05720192691	-3.4654	4.9164e-16	4.2235e-14
c86171_g1	7.72872619323097	4319.60577611742	-9.1265	5.3681e-16	4.6038e-14
c86063_g1	2237.10937072432	33.9609434302792	6.0416	5.5209e-16	4.7269e-14
c41425_g1	4220.35850769511	912.896763018526	2.2088	5.5334e-16	4.7297e-14
c58600_g1	1927.28021722368	411.569571333385	2.2274	5.5487e-16	4.7348e-14
c65117_g1	103.442733191375	1178.27682558683	-3.5098	5.8126e-16	4.9518e-14
c64722_g4	6.65553708908026	85.531550192383	-3.6838	6.2656e-16	5.3288e-14
c67369_g4	7.36911396032183	89.5650365391412	-3.6034	6.9194e-16	5.8751e-14
c50238_g1	1011.34984451178	207.893349735077	2.2824	7.133e-16	6.0463e-14
c57370_g1	1507.534804554	318.106526924741	2.2446	7.3103e-16	6.1864e-14
c56429_g1	136.658852857516	15.7093336920202	3.1209	8.7348e-16	7.3796e-14
c28601_g1	1686.46529120246	74.3714073678251	4.5031	9.0181e-16	7.6065e-14
c63139_g1	77.2269054036307	5.15730111843077	3.9044	9.6936e-16	8.1627e-14
c56492_g1	56.2733960949952	1.77642050183094	4.9854	9.9401e-16	8.3565e-14
c36399_g1	192.583931908756	920.945023547736	-2.2576	1.1412e-15	9.5783e-14
c67643_g3	276.711156636513	1692.3939257235	-2.6126	1.1929e-15	9.9955e-14
c15382_g1	1612.03047717622	11647.4170517641	-2.8531	1.1954e-15	1e-13
c66520_g1	47.7810177711469	0.708447654156262	6.0756	1.2076e-15	1.0086e-13
c12978_g1	12751.9121877127	1708.55199595118	2.8999	1.2232e-15	1.0199e-13
c40659_g4	63.4554264151758	0	Inf	1.2344e-15	1.0276e-13
c51543_g2	28624.4853816538	124943.885599396	-2.126	1.2706e-15	1.056e-13
c67854_g1	59.9498381621046	338.645165254998	-2.4979	1.2747e-15	1.0577e-13
c40084_g1	727.869683801455	149.635345222012	2.2822	1.2901e-15	1.0688e-13
c62602_g1	1586.18526170727	16.0516803990786	6.6267	1.3153e-15	1.0878e-13
c67320_g3	425.300212871413	81.1542308327316	2.3897	1.3611e-15	1.124e-13
c97499_g1	15.3425514896058	14317.7915337157	-9.8661	1.3938e-15	1.1491e-13
c60040_g1	1341.61643331252	289.880432756936	2.2104	1.5638e-15	1.2861e-13
c74155_g1	1768.05459939595	385.452672939646	2.1975	1.565e-15	1.2861e-13
c80744_g1	0.264413717356393	41.04574794719	-7.2783	1.6579e-15	1.3602e-13
c64566_g2	2.86257287912933	102.33014995907	-5.1598	1.7115e-15	1.4019e-13
c79905_g1	1861.34147354767	245.097667347877	2.9249	1.9333e-15	1.5811e-13
c66192_g1	454.17464064716	86.4607128053976	2.3931	2.1167e-15	1.7283e-13
c45513_g1	372.809518517311	70.8169368242742	2.3963	2.1255e-15	1.7328e-13
c66762_g4	1189.71564897999	5261.7046358034	-2.1449	2.1785e-15	1.7731e-13
c64498_g4	49.7410961959276	0.992595387024222	5.6471	2.2077e-15	1.7941e-13
c63171_g1	288.597712238026	41.428332158852	2.8004	2.3833e-15	1.9337e-13
c59808_g1	2363.21360590248	385.366741236146	2.6164	2.6136e-15	2.1171e-13
c67484_g3	18.6264615451408	449.785062482293	-4.5938	2.853e-15	2.3074e-13
c53401_g1	37.9369818390648	615.008948104075	-4.0189	2.9168e-15	2.3553e-13
c92266_g1	150.852081017781	726.357965530492	-2.2675	3.0649e-15	2.471e-13
c66455_g4	59.3906378493195	2.38083063082641	4.6407	3.1371e-15	2.5252e-13
c59711_g1	2.86257287912933	109.750405554923	-5.2608	3.3146e-15	2.6639e-13
c7975_g1	150.313132911997	924.995991050686	-2.6215	3.7868e-15	3.0386e-13
c68327_g1	702.265749323975	4.75351144100768	7.2069	3.9506e-15	3.165e-13
c79944_g1	26.7131787252955	1290.34031705869	-5.5941	4.1067e-15	3.2849e-13
c67776_g2	1.41733800132818	76.3893740649361	-5.7521	4.2191e-15	3.3696e-13
c67288_g2	103.145434427852	519.871409632617	-2.3335	4.2912e-15	3.4218e-13
c60873_g1	26.8068268938564	30768.5343429188	-10.165	4.541e-15	3.6154e-13
c67270_g3	465.461674888055	8.13508727950344	5.8384	4.637e-15	3.6861e-13
c61019_g1	16.9726067029292	183.331037825023	-3.4332	4.6469e-15	3.6882e-13
c43572_g2	49.9643421067049	1.3792065779873	5.179	4.9158e-15	3.8956e-13
c67396_g7	193.266174080822	912.946661955225	-2.2399	5.2335e-15	4.141e-13
c74290_g1	6828.84277368275	1588.80144046543	2.1037	5.4677e-15	4.3196e-13
c74594_g1	615.099834468548	1.81410923215616	8.4054	5.8366e-15	4.6039e-13
c85772_g1	853.36496707614	183.128515331037	2.2203	6.5014e-15	5.1204e-13
c59081_g1	642.769274661137	29.8371704253721	4.4291	6.897e-15	5.4236e-13
c44133_g1	118.448634687595	13.5668122430914	3.1261	7.1199e-15	5.5902e-13
c2479_g1	215.594055807736	36.0337843269672	2.5809	7.3742e-15	5.7811e-13
c54470_g1	2210.59277305185	21.3613105058759	6.6933	7.7592e-15	6.0736e-13
c86706_g1	87.417477969247	7.50201708599763	3.5426	8.367e-15	6.5393e-13
c54207_g1	2046.72010003142	467.021295064661	2.1318	8.8404e-15	6.8988e-13
c64596_g1	28.3556674793602	1175.41033088142	-5.3734	9.2226e-15	7.1751e-13
c91836_g1	1616.6316488771	2.38985929664129	9.4018	9.2134e-15	7.1751e-13
c67429_g2	1014.6365796622	9099.6021486353	-3.1648	9.3058e-15	7.2289e-13
c65571_g1	495.777143759093	2.02130543730799	7.9383	9.47e-15	7.3452e-13
c65296_g1	81.3584418151758	0.330865129008074	7.9419	9.6126e-15	7.4445e-13
c66117_g4	1100.82329501274	4647.60619222817	-2.0779	9.782e-15	7.5643e-13
c97368_g1	36.6450025343814	221.871495133591	-2.598	1.0053e-14	7.7623e-13
c4578_g1	911.622223858555	198.421746294425	2.1999	1.0689e-14	8.241e-13
c85853_g1	4918.43524017279	1161.63337859603	2.082	1.2814e-14	9.8643e-13
c62242_g1	194.692685764672	886.05168049106	-2.1862	1.2897e-14	9.9134e-13
c60036_g1	640.366151668368	2681.47058111122	-2.0661	1.3657e-14	1.0481e-12
c79890_g1	485.172132430413	101.153696870354	2.2619	1.4299e-14	1.0958e-12
c92253_g1	422.101846188509	83.7623048039845	2.3332	1.4424e-14	1.1037e-12
c65090_g3	69.545065510549	353.920619490093	-2.3474	1.461e-14	1.1162e-12
c64883_g1	812.512949362214	178.496819261503	2.1865	1.4992e-14	1.1437e-12
c57239_g2	691.483599991219	62.1060117190547	3.4769	1.5856e-14	1.2079e-12
c58387_g1	3012.2332150163	6.92469295444683	8.7649	1.6595e-14	1.2623e-12
c46352_g1	9490.67886592177	2266.2236555296	2.0662	1.6653e-14	1.2648e-12
c63588_g1	955.501938907218	219.86111118568	2.1197	1.7935e-14	1.3601e-12
c65144_g2	35.8420874391442	0	Inf	1.8498e-14	1.4007e-12
c66492_g2	5397.25228700889	1296.8118108164	2.0573	1.8557e-14	1.4031e-12
c67714_g2	14.2036110933672	116.739082153201	-3.039	1.9264e-14	1.4544e-12
c14948_g1	222.094570312034	7.8231583272949	4.8273	1.9476e-14	1.4682e-12
c59321_g1	888.086022691571	197.172641159819	2.1712	1.9539e-14	1.4708e-12
c45767_g1	599.989386777464	5.5077976461343	6.7673	1.9836e-14	1.4911e-12
c40659_g2	114.92501883195	0	Inf	2.0554e-14	1.5427e-12
c61462_g1	9.74064292135979	159.987732051241	-4.0378	2.0848e-14	1.5625e-12
c97754_g1	47.8195851443889	1.3792065779873	5.1157	2.0929e-14	1.5663e-12
c67894_g1	94.9370304046766	460.674110983059	-2.2787	2.1202e-14	1.5844e-12
c57523_g1	705.698324341565	154.87806644532	2.1879	2.1389e-14	1.596e-12
c60484_g4	54.6877685464709	291.895722529319	-2.4162	2.1732e-14	1.6193e-12
c85769_g1	2393.06583009728	574.534066348455	2.0584	2.2587e-14	1.6805e-12
c67224_g2	1.01577410521937	42.9614417922715	-5.4024	2.2683e-14	1.6852e-12
c4822_g1	2.57845678046954	56.2095657063011	-4.4462	2.3446e-14	1.7393e-12
c63676_g1	125.71082954925	16.466951654552	2.9325	2.5256e-14	1.8709e-12
c54843_g1	429.660715121302	87.1205895110314	2.3021	2.5578e-14	1.892e-12
c66671_g13	10954.1404456152	1563.77260830863	2.8084	2.764e-14	2.0416e-12
c48846_g1	19.6446407529661	178.251885835994	-3.1817	2.7994e-14	2.0648e-12
c68177_g1	280.183842477168	1205.92240598171	-2.1057	2.9444e-14	2.1686e-12
c46938_g1	42.1912591476684	0.708447654156262	5.8961	2.9709e-14	2.185e-12
c66505_g6	16.9010660182777	127.855103727909	-2.9193	3.0182e-14	2.2165e-12
c66803_g3	1.09134113846219	42.7896650284833	-5.2931	3.2218e-14	2.3627e-12
c65240_g1	715.160874587751	158.080092164762	2.1776	3.338e-14	2.4444e-12
c97720_g1	30.2302213317562	184.609818120571	-2.6104	3.3819e-14	2.473e-12
c58454_g1	1759.09432138719	419.051493912097	2.0696	3.4249e-14	2.5009e-12
c97881_g1	47.1411739901824	1.39883797668275	5.0747	3.5017e-14	2.5533e-12
c64607_g2	17.7978419790562	131.178664215488	-2.8818	3.7303e-14	2.7161e-12
c74127_g1	12.0628804796425	109.496628204894	-3.1822	3.7535e-14	2.7291e-12
c67981_g1	1.15702153155658	86.3271363705568	-6.2213	3.7709e-14	2.7378e-12
c68021_g1	17.1992369036642	3318.76108276749	-7.5922	3.7927e-14	2.7498e-12
c62217_g1	38.1839564797368	0.330865129008074	6.8506	3.8006e-14	2.7516e-12
c12896_g1	457.459610158422	2351.7542216811	-2.362	3.8397e-14	2.7721e-12
c64369_g1	498.810983881661	106.84882832766	2.2229	3.8366e-14	2.7721e-12
c67623_g1	2417.43489473198	0.699418988341375	11.755	4.0187e-14	2.8972e-12
c65900_g1	12.7443923278329	106.17107791367	-3.0585	4.2648e-14	3.0703e-12
c65114_g1	131.177563679697	582.673381550177	-2.1512	4.5512e-14	3.2718e-12
c79970_g1	3300.14324789762	801.153112730951	2.0424	4.7101e-14	3.3814e-12
c68479_g1	60.6025274792145	1.33248918184718	5.5072	4.7322e-14	3.3924e-12
c4265_g1	12828.4851235452	1872.76697257906	2.7761	4.8318e-14	3.459e-12
c60945_g1	62.609009309747	2542.48097895184	-5.3437	5.1411e-14	3.6753e-12
c64147_g1	659.682216459072	147.582926807958	2.1602	5.6559e-14	4.0377e-12
c42990_g1	154.036925373408	22.7804751031501	2.7574	5.752e-14	4.1005e-12
c66422_g3	14.6848392703036	115.534800473134	-2.9759	5.817e-14	4.1411e-12
c66671_g12	1791.40506250819	431.071870610168	2.0551	6.0602e-14	4.3082e-12
c4755_g1	1886.24326273936	455.566811646162	2.0498	6.1125e-14	4.3333e-12
c64941_g1	561.379539776453	79.977673781161	2.8113	6.1107e-14	4.3333e-12
c25799_g1	1723.48430444807	412.462532639929	2.063	6.4637e-14	4.5756e-12
c92141_g1	627.987312133376	2.07862556632867	8.239	6.4721e-14	4.5756e-12
c67825_g1	1.74743211177896	48.2859810965673	-4.7883	6.9249e-14	4.889e-12
c97640_g1	622.321852675536	137.839536057658	2.1747	6.9937e-14	4.9307e-12
c97694_g1	46.0499037507137	1.33248918184718	5.111	7.4689e-14	5.2585e-12
c66474_g2	410.015879037605	1681.89211084313	-2.0363	7.532e-14	5.2956e-12
c65800_g1	1064.50479903274	5339.89584767137	-2.3266	7.6358e-14	5.3612e-12
c83095_g1	39.1892018861741	0	Inf	7.9138e-14	5.5488e-12
c64914_g1	4.59192385559028	255.587416259111	-5.7986	8.5316e-14	5.9738e-12
c64143_g1	80.6949937360543	378.417964948292	-2.2294	8.8528e-14	6.1902e-12
c61546_g1	246.191012447284	46.0010381702566	2.42	9.3924e-14	6.5585e-12
c63171_g2	369.425279978543	61.9182632893245	2.5768	9.4285e-14	6.5747e-12
c56618_g1	6.55207317936447	98.1379424936395	-3.9048	9.7379e-14	6.7812e-12
c62792_g1	4156.184014632	4.97876497778929	9.7053	1.0143e-13	7.054e-12
c66809_g2	2019.12490228632	8033.77297104251	-1.9923	1.0215e-13	7.0944e-12
c67160_g2	2697.15731902463	10614.5309494189	-1.9765	1.0469e-13	7.2608e-12
c42919_g1	332.052664586439	1353.51324351422	-2.0272	1.0919e-13	7.5567e-12
c45393_g1	485.21928892798	105.305811183255	2.2041	1.0925e-13	7.5567e-12
c64161_g1	89.0403352410018	9.21954339174221	3.2717	1.1902e-13	8.2212e-12
c67102_g4	36.4923890198973	0.330865129008074	6.7852	1.2043e-13	8.3071e-12
c91709_g1	146.693839614095	9.0425813181664	4.0199	1.2322e-13	8.4882e-12
c65579_g7	1289.53804821798	312.494364896117	2.045	1.2964e-13	8.9182e-12
c46554_g1	1366.68737214723	329.006092633196	2.0545	1.3018e-13	8.9438e-12
c58900_g1	4.57222147428688	94.7368796085227	-4.373	1.3169e-13	9.0352e-12
c46313_g1	164.691712433237	24.4716106333459	2.7506	1.3337e-13	9.138e-12
c86044_g1	157.600482418801	680.279047379297	-2.1099	1.3434e-13	9.1926e-12
c56600_g1	58.9865270526178	3.3914833494804	4.1204	1.4958e-13	1.0222e-11
c47150_g1	697.970648234679	2731.79030633605	-1.9686	1.5259e-13	1.0413e-11
c67873_g1	406.14927000262	1650.35860924092	-2.0227	1.5418e-13	1.0507e-11
c91811_g1	517.23030491039	115.861454999567	2.1584	1.5634e-13	1.0641e-11
c59298_g7	189.765648864131	0.330865129008074	9.1638	1.6128e-13	1.0963e-11
c62077_g2	426.286650786349	93.598898233259	2.1873	1.656e-13	1.1241e-11
c51586_g2	187.324959019413	0	Inf	1.6706e-13	1.1325e-11
c68217_g1	46.6863632417205	1.69044030829992	4.7875	1.9479e-13	1.3188e-11
c37234_g1	7.93572491165602	93.4041109413588	-3.5571	1.9692e-13	1.3314e-11
c42985_g1	875.009989873988	193.332455799126	2.1782	1.9831e-13	1.3391e-11
c93002_g1	46.4096577816097	237.234039402673	-2.3538	2.0657e-13	1.393e-11
c97404_g1	845.588339228913	203.209055737719	2.057	2.0813e-13	1.4016e-11
c66049_g14	1761.99098966277	6981.9449052179	-1.9864	2.1684e-13	1.4584e-11
c64834_g1	586.427583302937	5205.15904389089	-3.1499	2.1913e-13	1.4718e-11
c22615_g1	4.77095479854889	644.927198763279	-7.0787	2.1993e-13	1.4753e-11
c64803_g2	1342.33874110607	329.345291206123	2.0271	2.2777e-13	1.5259e-11
c62825_g1	1465.17000145972	362.191592882619	2.0162	2.3077e-13	1.5439e-11
c2312_g1	2920.4519404531	748.25089675019	1.9646	2.7377e-13	1.8292e-11
c68178_g1	1713.93411242486	6376.48709314488	-1.8955	2.8425e-13	1.8968e-11
c64107_g1	939.248217007694	226.679458054805	2.0509	2.8744e-13	1.9156e-11
c67552_g1	371.699741748564	80.9576373604604	2.1989	3.0031e-13	1.9987e-11
c55283_g1	3187.73311746733	749.197571689785	2.0891	3.0181e-13	2.0061e-11
c91728_g1	97.6196466862398	434.275644801117	-2.1534	3.2682e-13	2.1695e-11
c24841_g1	979.261648247012	240.246917029761	2.0272	3.3048e-13	2.1909e-11
c2266_g1	1564.15118302496	6021.14285121304	-1.9447	3.3621e-13	2.226e-11
c92078_g1	39.1668817052844	201.964632415091	-2.3664	3.4651e-13	2.2913e-11
c57149_g1	1293.03844503524	4977.75321828943	-1.9447	3.5173e-13	2.3228e-11
c66130_g3	24.0716593513179	173.209504460921	-2.8471	3.9141e-13	2.5815e-11
c67584_g1	33.3967544888357	0	Inf	4.2165e-13	2.7773e-11
c64420_g1	40.7822574394967	1.04834144897922	5.2818	4.4484e-13	2.9263e-11
c74131_g1	6318.87760919294	1645.43786185009	1.9412	4.5508e-13	2.9898e-11
c65902_g1	1178.01728466688	4517.72183742445	-1.9392	4.5818e-13	3.0063e-11
c67167_g1	27.8604554146906	157.924151933673	-2.5029	4.5924e-13	3.0094e-11
c67985_g1	3764.89445460528	974.915405218277	1.9493	4.8533e-13	3.1764e-11
c59120_g1	47.4779831478043	1.00162405283911	5.5668	4.8684e-13	3.1822e-11
c74338_g1	137.786980958999	791.383203054653	-2.5219	5.2645e-13	3.4367e-11
c67557_g2	1751.93162952248	446.522847985016	1.9721	5.2714e-13	3.4368e-11
c66808_g2	1661.07909949583	424.285331939685	1.969	5.5331e-13	3.6028e-11
c60778_g1	398.998986377018	66.8987859574533	2.5763	5.6308e-13	3.6618e-11
c21864_g1	385.95661849453	18.7593491796119	4.3628	5.9751e-13	3.8758e-11
c67603_g1	1877.56964623437	7158.66704866052	-1.9308	5.9677e-13	3.8758e-11
c86505_g1	541.464128721619	125.609239975715	2.1079	6.0208e-13	3.9005e-11
c68010_g1	608.503845849591	144.098192289471	2.0782	6.4191e-13	4.1533e-11
c62770_g1	411.528432920735	94.5663489364519	2.1216	6.7607e-13	4.3687e-11
c65277_g1	140.284010414668	581.767638219062	-2.0521	6.9279e-13	4.4711e-11
c34718_g1	33.5772648797928	0	Inf	7.12e-13	4.5893e-11
c2277_g1	3833.00946757297	1009.03646021102	1.9255	7.2124e-13	4.643e-11
c65670_g1	1083.22680852101	2.04093683600345	9.0519	8.0417e-13	5.1703e-11
c63755_g2	77.3148886113656	363.558861756757	-2.2334	8.5352e-13	5.4807e-11
c8066_g1	1515.88426464048	389.606680076129	1.9601	8.781e-13	5.6315e-11
c39999_g1	343.726790539623	1354.94861775551	-1.9789	8.9981e-13	5.7635e-11
c80217_g1	1135.91155405929	289.209074473252	1.9737	9.113e-13	5.8298e-11
c2699_g1	258.778282017644	1014.99609878367	-1.9717	9.1681e-13	5.8577e-11
c66498_g4	1275.28720829406	5480.56270097755	-2.1035	9.1856e-13	5.8616e-11
c20281_g1	338.506708753684	1308.90169030821	-1.9511	9.4087e-13	5.9965e-11
c38757_g1	4.77095479854889	59.4020026712748	-3.6382	9.966e-13	6.3437e-11
c66315_g1	2189.90890961079	22951.809921781	-3.3897	1.03e-12	6.5482e-11
c5079_g1	588.822860893815	141.673792396636	2.0553	1.0617e-12	6.7411e-11
c20460_g1	293.409250284957	1150.39202626917	-1.9711	1.126e-12	7.1408e-11
c57423_g2	2654.05242536852	694.165436015453	1.9348	1.1307e-12	7.1617e-11
c55449_g1	297.639440401006	63.8108981162625	2.2217	1.1535e-12	7.2968e-11
c65134_g1	60.7052248985589	4.74360393002304	3.6778	1.1823e-12	7.4699e-11
c66766_g2	377.168238922982	2069.94165007119	-2.4563	1.2551e-12	7.9203e-11
c63879_g1	97.7036382778818	0.699418988341375	7.1261	1.2949e-12	8.1613e-11
c68108_g1	134.881548128312	22.1548595083935	2.606	1.3195e-12	8.3062e-11
c91565_g1	12868.3453782033	3493.32831282305	1.8812	1.3229e-12	8.3171e-11
c65973_g1	407.174039825878	1589.01460160943	-1.9644	1.3556e-12	8.5125e-11
c92011_g1	1216.10016640726	4460.19617692161	-1.8748	1.3594e-12	8.5254e-11
c66942_g1	9014.791295123	15.2802157074919	9.2045	1.3958e-12	8.7433e-11
c61143_g1	191.989052219732	2025.68130650311	-3.3993	1.4462e-12	9.0481e-11
c64867_g1	2992.0111139977	793.192255127472	1.9154	1.4566e-12	9.1017e-11
c79955_g1	665.116297040578	162.70451725882	2.0314	1.4809e-12	9.2424e-11
c67308_g2	4.93600185377428	60.595681618462	-3.6178	1.4879e-12	9.274e-11
c86308_g1	5.36546262635606	63.6912561717073	-3.5693	1.4896e-12	9.274e-11
c66271_g2	9.33336053168081	80.5579705243813	-3.1096	1.509e-12	9.3832e-11
c74212_g1	548.905747721391	135.142933118596	2.0221	1.5302e-12	9.5036e-11
c66407_g1	43.3441834316401	214.882537931977	-2.3096	1.5408e-12	9.5579e-11
c47260_g1	502.753412781057	120.429159324458	2.0617	1.64e-12	1.0161e-10
c54978_g1	46.2461610733763	2.06959690051379	4.4819	1.6499e-12	1.021e-10
c64489_g2	3608.93840161471	970.503235724748	1.8948	1.7036e-12	1.0529e-10
c57535_g1	4237.43764674145	1103.52905200788	1.9411	1.7725e-12	1.0942e-10
c66789_g2	39.6334304031097	203.431344763643	-2.3598	1.8508e-12	1.1411e-10
c97585_g1	66.5483722476576	1725.97653022897	-4.6969	1.8529e-12	1.1411e-10
c66975_g2	202.233402663154	794.083115684724	-1.9733	1.8561e-12	1.1417e-10
c32546_g1	619.608313690201	153.516086843824	2.013	1.8656e-12	1.1462e-10
c66715_g1	83.7308081655786	401.244087996346	-2.2606	1.8934e-12	1.1618e-10
c66624_g1	1825.42774388304	6713.38340795246	-1.8788	1.9088e-12	1.1698e-10
c15585_g1	464.065243116922	1764.27542972756	-1.9267	1.9759e-12	1.2095e-10
c15371_g1	925.534306780717	3439.31440686664	-1.8938	1.9961e-12	1.2204e-10
c48538_g1	260.976161400576	1018.01254838228	-1.9638	2.0427e-12	1.2474e-10
c85920_g1	990.382487711712	255.18895736157	1.9564	2.0684e-12	1.2616e-10
c40701_g1	1117.22497145039	289.860154626376	1.9465	2.081e-12	1.2663e-10
c56643_g1	1793.15577333992	474.758194831128	1.9172	2.0806e-12	1.2663e-10
c66764_g4	147.714011929122	26.2450666243193	2.4927	2.1295e-12	1.2943e-10
c66498_g2	492.798213303047	2419.00299619636	-2.2953	2.199e-12	1.3349e-10
c65033_g1	7224.89056444797	1983.40627446788	1.865	2.2829e-12	1.3842e-10
c61220_g1	317.093488792136	2547.49650671744	-3.0061	2.3198e-12	1.4049e-10
c64489_g3	294.444815036723	65.1871886734238	2.1753	2.3468e-12	1.4196e-10
c65092_g1	118.36558611681	18.2562441782251	2.6968	2.487e-12	1.5026e-10
c66191_g1	33.69888082382	174.123343257879	-2.3693	2.5309e-12	1.5255e-10
c74378_g1	6884.52145157532	1896.71275666173	1.8599	2.5291e-12	1.5255e-10
c37431_g1	168.174696909445	32.009230783981	2.3934	2.6568e-12	1.5996e-10
c97538_g1	1179.14068426552	100.055569551522	3.5589	2.8226e-12	1.6973e-10
c97769_g1	456.634014985638	109.216091714748	2.0639	2.8821e-12	1.7311e-10
c60950_g1	840.629269504124	215.892032320144	1.9612	2.9055e-12	1.7431e-10
c57491_g2	107.153520952404	16.0735810867356	2.7369	2.9693e-12	1.7778e-10
c97435_g1	583.625120622707	146.562222226245	1.9935	2.9704e-12	1.7778e-10
c39796_g1	1035.65794980499	269.994032910289	1.9395	3.0678e-12	1.834e-10
c66889_g1	51.8112117796084	3.51515227333665	3.8816	3.0953e-12	1.8483e-10
c21144_g1	53.860128167738	373.889658554034	-2.7953	3.1743e-12	1.893e-10
c64267_g1	1115.28739513867	291.857106463792	1.9341	3.1788e-12	1.893e-10
c91955_g1	4203.55965818984	631.697513278171	2.7343	3.1813e-12	1.893e-10
c65702_g1	745.845686035604	2699.83660485899	-1.8559	3.1901e-12	1.896e-10
c66337_g1	159.236752418649	724.6660955072	-2.1861	3.3277e-12	1.9755e-10
c62436_g2	45.5318177117633	1.00162405283911	5.5065	3.3763e-12	1.9997e-10
c68116_g1	241.037699840976	32.2358747645544	2.9025	3.3735e-12	1.9997e-10
c67672_g1	34.3196642821148	378.754583576553	-3.4642	3.4822e-12	2.0601e-10
c47561_g1	2302.95236209138	357.051836379176	2.6893	3.6258e-12	2.1425e-10
c21530_g1	23.5450952212242	316.650138941772	-3.7494	3.6427e-12	2.15e-10
c54949_g1	346.92699259949	80.1965917784805	2.113	3.6601e-12	2.1578e-10
c20555_g1	631.684141369789	159.783867603495	1.9831	3.7149e-12	2.1876e-10
c64422_g2	0	27.6265424912682	-Inf	3.7291e-12	2.1934e-10
c59543_g1	74.4783786657435	4.09993100363666	4.1832	3.7484e-12	2.2022e-10
c66498_g3	2864.0545099744	11882.8987012355	-2.0528	3.8364e-12	2.2514e-10
c67745_g3	8.89401311895059	80.1300593603711	-3.1714	3.8865e-12	2.2782e-10
c60779_g1	9.97137036967956	81.3227636003456	-3.0278	4.0926e-12	2.3962e-10
c66560_g2	57.3796467757981	3.44880347850108	4.0564	4.1545e-12	2.4297e-10
c85750_g1	454.971752951277	109.964497388191	2.0487	4.2006e-12	2.4539e-10
c13056_g1	64.7199382050395	379.688091925385	-2.5525	4.2144e-12	2.4591e-10
c67946_g1	246.391491449269	7.76583819827422	4.9877	4.3446e-12	2.5322e-10
c47155_g1	1518.77588211705	408.477425517608	1.8946	4.4544e-12	2.5932e-10
c67877_g3	259.991225701577	974.888965952697	-1.9068	5.0385e-12	2.9299e-10
c57667_g1	2.17279563677595	93.5286102203533	-5.4278	5.0849e-12	2.9535e-10
c39768_g1	8.91781274783878	11249.7426777282	-10.301	5.24e-12	3.0401e-10
c38246_g1	232.763806787745	0	Inf	5.2461e-12	3.0402e-10
c59890_g1	592.40367905141	150.179150836593	1.9799	5.7456e-12	3.326e-10
c20139_g1	1619.02652350766	438.775154879602	1.8836	5.8707e-12	3.3945e-10
c91821_g1	69.8546024840823	7.21944342019535	3.2744	5.9907e-12	3.46e-10
c67571_g8	0.528827434712786	32.8066231425258	-5.955	6.211e-12	3.5832e-10
c55418_g1	538.874141287077	135.694514324483	1.9896	6.2489e-12	3.6009e-10
c62505_g1	252.724433331691	7508.81932668124	-4.8929	6.3666e-12	3.6647e-10
c59992_g1	263.688473769079	14.4668516830051	4.188	6.6558e-12	3.8268e-10
c50671_g1	84.6748997881595	610.314124051464	-2.8495	6.6859e-12	3.8398e-10
c68051_g1	9068.39493716951	1145.58361057621	2.9848	6.7651e-12	3.8809e-10
c63309_g1	70.8039832385802	318.13685803638	-2.1677	6.9588e-12	3.9876e-10
c74779_g1	461.103002613439	114.068734856446	2.0152	7.0095e-12	4.0121e-10
c52751_g1	634.648185051432	163.302863232859	1.9584	7.2979e-12	4.1725e-10
c20089_g1	857.446020200598	227.125842287024	1.9166	7.6325e-12	4.3589e-10
c6224_g1	481.515545407455	2794.00381895702	-2.5367	7.6536e-12	4.3662e-10
c68363_g1	66.9516282887453	0	Inf	7.9851e-12	4.5502e-10
c40659_g3	74.3506148664928	0	Inf	8.0864e-12	4.6027e-10
c63637_g1	167.176379247159	648.186984535917	-1.955	8.263e-12	4.698e-10
c62035_g1	48.487113104846	3.11793834949301	3.9589	8.3514e-12	4.7431e-10
c92111_g1	58.3304534455502	266.17158612471	-2.19	8.429e-12	4.7818e-10
c92267_g1	292.291775313994	67.7166885598633	2.1098	8.4938e-12	4.8132e-10
c23304_g1	172.031791165498	33.9188604741051	2.3425	8.9379e-12	5.0593e-10
c40672_g1	5.59788221965469	57.8720411719866	-3.3699	8.9751e-12	5.0747e-10
c80007_g1	1808.57170199084	504.323905922201	1.8424	9.1351e-12	5.1595e-10
c56397_g1	135.933733367642	706.300465704288	-2.3774	9.577e-12	5.4031e-10
c47252_g1	1.24240430595436	36.5996268804677	-4.8806	9.6857e-12	5.4584e-10
c67589_g1	4.49672534003753	66.0161571173049	-3.8759	9.8977e-12	5.5717e-10
c15640_g1	2468.52782518115	3.77966860750916	9.3512	1.0041e-11	5.6463e-10
c67362_g3	23.8867681168022	133.212841674638	-2.4794	1.0052e-11	5.6463e-10
c56717_g1	98.8532318046401	14.9114782248848	2.7289	1.0166e-11	5.7042e-10
c68183_g1	2329.76661705152	650.267966034418	1.8411	1.0203e-11	5.7183e-10
c60595_g1	277.976133954525	40.9279595550173	2.7638	1.0278e-11	5.7541e-10
c51050_g3	27.9121519200518	0	Inf	1.075e-11	6.012e-10
c85965_g1	428.680691291315	1513.71248745406	-1.8201	1.1326e-11	6.3267e-10
c79940_g1	4564.96230201491	1297.04014316375	1.8154	1.1697e-11	6.5268e-10
c56922_g1	4.11896107281691	51.689641245994	-3.6495	1.1931e-11	6.6502e-10
c64401_g1	70.5014488758843	1.04834144897922	6.0715	1.1944e-11	6.6503e-10
c86119_g1	599.990748690894	1.34151784766207	8.8049	1.2165e-11	6.7663e-10
c21849_g1	37.8693966040112	0	Inf	1.2469e-11	6.9277e-10
c62165_g1	173.539764906646	3.4472294114354	5.6537	1.2871e-11	7.1431e-10
c62628_g1	253.624614916368	937.013010570896	-1.8854	1.2903e-11	7.1531e-10
c49419_g2	1072.97656525293	301.960979795179	1.8292	1.3307e-11	7.3692e-10
c67754_g3	19.0024627683891	114.015258083452	-2.585	1.3372e-11	7.397e-10
c66907_g1	166.69012816803	1026.15640791185	-2.622	1.4019e-11	7.7468e-10
c97535_g1	678.935702984663	41.7077576905229	4.0249	1.4145e-11	7.8081e-10
c64616_g3	750.718920794921	201.775261428263	1.8955	1.4404e-11	7.9424e-10
c67236_g2	521.920493243019	1835.39865379378	-1.8142	1.4627e-11	8.0566e-10
c59137_g1	1064.24740523098	46.8120370437389	4.5068	1.4711e-11	8.0939e-10
c66993_g1	0.264413717356393	29.0933033298522	-6.7817	1.5507e-11	8.5231e-10
c24442_g1	1051.37678611382	287.617070643746	1.8701	1.5696e-11	8.6174e-10
c85857_g1	30.6753581370501	0.368553859333301	6.3791	1.5806e-11	8.6683e-10
c12340_g1	0	25.8666052540014	-Inf	1.6134e-11	8.839e-10
c30875_g1	221.95455347022	46.6002629894644	2.2519	1.6884e-11	9.2282e-10
c68733_g1	289.278533896528	23.6396776786072	3.6132	1.6889e-11	9.2282e-10
c97726_g1	263.073801999513	61.3226023408272	2.101	1.6899e-11	9.2282e-10
c18267_g1	64.6171872529508	7.00164448216296	3.2062	1.7103e-11	9.3299e-10
c80120_g1	451.303718076317	113.620497071844	1.9899	1.7242e-11	9.3957e-10
c42932_g1	708.84372776809	189.987970449123	1.8996	1.7757e-11	9.6658e-10
c47257_g1	130.646831403024	503.023727318785	-1.945	1.7918e-11	9.7434e-10
c45592_g1	4.22242498253271	52.6937182110685	-3.6415	1.8245e-11	9.9103e-10
c68338_g1	1139.06953816475	129.979335731902	3.1315	1.8586e-11	1.0085e-09
c63320_g1	43.2669951524119	2.36277329919663	4.1947	1.8945e-11	1.0269e-09
c79886_g1	1683.79812205156	477.592400066312	1.8179	1.9901e-11	1.0776e-09
c97724_g1	532.180253489428	137.626930530225	1.9512	1.9966e-11	1.08e-09
c74063_g1	6870.48035501188	2014.50503396962	1.77	2.0022e-11	1.0818e-09
c54004_g1	17.6762969340223	105.752658524065	-2.5808	2.0188e-11	1.0897e-09
c64420_g2	41.11983308749	0	Inf	2.0378e-11	1.0988e-09
c65331_g1	523.368661715183	1774.42234910763	-1.7614	2.0417e-11	1.0997e-09
c67528_g4	638.219794794008	170.616108691882	1.9033	2.0673e-11	1.1123e-09
c63992_g2	1747.97897828822	497.366334199857	1.8133	2.1472e-11	1.154e-09
c80276_g1	738.656032379894	2546.48088113178	-1.7855	2.2261e-11	1.1952e-09
c62009_g1	74.1979304530152	295.000652605707	-1.9913	2.2852e-11	1.2257e-09
c39968_g1	126.675620106735	23.0073027069973	2.461	2.3598e-11	1.2643e-09
c29826_g1	1103.17341208125	306.716817115991	1.8467	2.3723e-11	1.2671e-09
c60537_g1	3257.59971619512	944.35717728258	1.7864	2.3704e-11	1.2671e-09
c91647_g1	546.249721431095	125.231473827293	2.125	2.3723e-11	1.2671e-09
c98359_g1	80.3934920934544	312.88926914178	-1.9605	2.5722e-11	1.3724e-09
c67895_g1	53.7550430120368	231.028764081811	-2.1036	2.7271e-11	1.4535e-09
c66009_g3	10.0986339082835	106.823316397281	-3.403	2.7686e-11	1.4741e-09
c60993_g1	1771.76983096415	506.239271791934	1.8073	2.7919e-11	1.485e-09
c54960_g1	986.241364126762	63.2962549459818	3.9617	2.8362e-11	1.5069e-09
c80365_g1	189.872581361355	702.285884363942	-1.887	2.86e-11	1.518e-09
c51785_g1	543.890335851954	3.45940621138165	7.2966	3.0283e-11	1.6057e-09
c80863_g1	12.9850064163011	87.7703750824066	-2.7569	3.0338e-11	1.607e-09
c62405_g1	109.584923547724	18.4462618969169	2.5706	3.0624e-11	1.6204e-09
c65940_g1	415.305111238143	1570.58809926166	-1.9191	3.2843e-11	1.736e-09
c57174_g1	213.627400166079	23.7518650244131	3.169	3.3223e-11	1.7543e-09
c43013_g1	11809.0440001849	3518.57133167198	1.7468	3.3566e-11	1.7706e-09
c58496_g1	134.610632060764	504.827050194787	-1.907	3.383e-11	1.7827e-09
c63417_g1	1985.38868467378	6766.63020921269	-1.769	3.3894e-11	1.7842e-09
c65888_g1	989.369158843286	278.484802027284	1.8289	3.4356e-11	1.8067e-09
c42138_g1	121.737071352368	22.3374226283361	2.4462	3.5428e-11	1.8611e-09
c97469_g1	166.644433752213	605.69637755582	-1.8618	3.5507e-11	1.8633e-09
c92155_g1	3.5186638524461	196.41859405079	-5.8028	3.6158e-11	1.8955e-09
c67749_g3	0.590410580222381	30.3201809194729	-5.6824	3.8963e-11	2.0405e-09
c80012_g1	3094.03882178461	912.864818568621	1.761	4.0054e-11	2.0955e-09
c66082_g1	147.756517385713	745.24131747408	-2.3345	4.0616e-11	2.1227e-09
c45568_g1	726.992970118637	199.040275655	1.8689	4.1059e-11	2.1437e-09
c60407_g1	2.14899600788776	39.8313266428323	-4.2122	4.1748e-11	2.1775e-09
c98594_g1	67.6072363676645	522.678642052043	-2.9507	4.3295e-11	2.2558e-09
c67962_g1	1011.44609311368	284.500842612581	1.8299	4.4679e-11	2.3256e-09
c20615_g1	424.765561311638	110.950101285057	1.9368	4.55e-11	2.3659e-09
c65796_g3	47.4228140872428	0.368553859333301	7.0076	4.5781e-11	2.3781e-09
c46676_g1	46.4833908718868	2.69363842820471	4.1091	4.6132e-11	2.3918e-09
c66498_g6	524.401433236575	2661.65906896332	-2.3436	4.6138e-11	2.3918e-09
c66278_g1	1472.00992952267	425.074710728847	1.792	4.8472e-11	2.5102e-09
c89496_g1	61.058122084297	1.4742154373332	5.3722	4.8538e-11	2.5111e-09
c6134_g1	204.420199553912	46.7765298411443	2.1277	4.8878e-11	2.5262e-09
c61478_g1	356.847143956517	28.044961880873	3.6695	5.0347e-11	2.5994e-09
c64659_g1	7807.06447371238	106707.379316674	-3.7727	5.1116e-11	2.6365e-09
c69145_g1	3.28793640412633	74.1461942202631	-4.4951	5.2009e-11	2.6799e-09
c21423_g1	20.4731894200573	159.939895595814	-2.9657	5.219e-11	2.6861e-09
c53507_g2	472.485377167874	13.7486801411381	5.1029	5.2236e-11	2.6861e-09
c74249_g1	1143.96511742986	327.931679165184	1.8026	5.6259e-11	2.8901e-09
c67652_g1	54.9243562863478	5.11215778935634	3.4254	5.6923e-11	2.9213e-09
c59923_g1	46.8432158017763	3.55284100366188	3.7208	5.8763e-11	3.0126e-09
c76003_g1	91.2459797574495	14.2940124507733	2.6744	5.9567e-11	3.0508e-09
c51346_g1	10.7744981618972	76.641481485857	-2.8305	5.9927e-11	3.0662e-09
c64594_g4	188.434939054277	665.988598799235	-1.8214	5.9987e-11	3.0662e-09
c15489_g1	2526.14268515024	747.686338441586	1.7564	6.0401e-11	3.0812e-09
c65795_g1	270.019156314574	64.6315331162247	2.0628	6.0378e-11	3.0812e-09
c66382_g1	544.988050941176	25.7830779727058	4.4017	6.1588e-11	3.1386e-09
c66419_g1	96.8298071903775	377.882078159071	-1.9644	6.4229e-11	3.2699e-09
c97277_g1	272.255651201802	989.406690161594	-1.8616	6.5742e-11	3.3436e-09
c59428_g1	99.147876602082	16.9041235976824	2.5522	6.6229e-11	3.3651e-09
c62798_g1	164.9787165289	603.675199150942	-1.8715	6.6426e-11	3.3717e-09
c86417_g1	871.885634475645	247.624985706586	1.816	6.8015e-11	3.4489e-09
c16282_g1	79.6329580230701	837.720997107613	-3.395	6.9044e-11	3.4976e-09
c42928_g1	481.868059867116	129.427755644036	1.8965	7.2327e-11	3.6603e-09
c86351_g1	1294.65742172408	372.831563164977	1.796	7.4535e-11	3.7683e-09
c58445_g1	22.5786834177535	119.433695288619	-2.4032	7.5594e-11	3.8181e-09
c67744_g1	476.246838145032	1633.45948146498	-1.7781	7.6946e-11	3.8826e-09
c50405_g1	1706.77526553063	1.03931278316434	10.681	7.7211e-11	3.8921e-09
c67280_g4	408.938215422964	1504.13629701112	-1.879	7.8855e-11	3.9711e-09
c80082_g1	2688.74313002005	94.4848195596132	4.8307	7.984e-11	4.0167e-09
c97779_g1	2.19659526566414	225.118742724507	-6.6793	8.0159e-11	4.0288e-09
c62704_g1	698.518020898862	196.184767973992	1.8321	8.0698e-11	4.0483e-09
c79872_g1	798.722534482827	223.592775916112	1.8368	8.0707e-11	4.0483e-09
c66108_g1	38.4304308597621	306.667781940858	-2.9964	8.1638e-11	4.091e-09
c13065_g2	8.35120179650459	12465.5161437834	-10.544	8.2609e-11	4.1356e-09
c63604_g2	1.34177096808536	56.9876939126981	-5.4084	8.3447e-11	4.1735e-09
c62467_g1	50.7593463027464	216.761605515177	-2.0944	8.4168e-11	4.2054e-09
c20454_g1	3494.85900009931	11502.8402283019	-1.7187	8.7348e-11	4.3601e-09
c56994_g1	26.7017417381552	145.799467443957	-2.449	8.7841e-11	4.3804e-09
c62033_g1	44.6523390296824	3.11793834949301	3.8401	8.9013e-11	4.4302e-09
c62520_g1	0.264413717356393	34.679906056085	-7.0352	8.9009e-11	4.4302e-09
c67050_g8	3039.439207786	913.259011390764	1.7347	9.3399e-11	4.644e-09
c33622_g1	264.277798096461	65.6818643688487	2.0085	9.6447e-11	4.7908e-09
c39667_g1	1249.69785456136	365.023760942147	1.7755	9.8705e-11	4.8983e-09
c91739_g1	538.698853096736	146.28827070851	1.8807	1.0055e-10	4.985e-09
c66294_g1	68.2278780279724	8.97465845626516	2.9264	1.0083e-10	4.9938e-09
c45688_g1	858.757422258304	2862.69300632041	-1.7371	1.043e-10	5.1606e-09
c66413_g3	9.61330848376234	69.6820643119425	-2.8577	1.0443e-10	5.1624e-09
c92105_g1	39.2071412235052	2.01227677149311	4.2842	1.0461e-10	5.1664e-09
c15281_g1	93.4331003783693	358.39692619836	-1.9396	1.0892e-10	5.3736e-09
c85740_g1	91.7147743936446	363.391391457587	-1.9863	1.1219e-10	5.5301e-09
c61026_g1	35.3707459023562	161.639876168551	-2.1922	1.1326e-10	5.5772e-09
c66692_g1	61.3802343965586	246.087529219329	-2.0033	1.1587e-10	5.7001e-09
c66074_g1	59.9400224209497	245.172716833179	-2.0322	1.1672e-10	5.7367e-09
c50610_g1	13.8538146016131	163.049781104725	-3.557	1.175e-10	5.7696e-09
c53878_g1	199.784543624901	46.4833534424615	2.1037	1.1786e-10	5.7812e-09
c14888_g1	24.7850944245726	0	Inf	1.1827e-10	5.7962e-09
c65913_g1	59.8019465875898	6.52747903060318	3.1956	1.2202e-10	5.9739e-09
c65299_g3	1586.6230702803	474.724868038244	1.7408	1.2392e-10	6.0615e-09
c67132_g4	918.716784630204	264.926419090155	1.794	1.2448e-10	6.0831e-09
c62189_g1	115.739334747833	13.1048235914778	3.1427	1.3083e-10	6.3869e-09
c61400_g2	66.5409616091086	0.737107718666601	6.4962	1.349e-10	6.5794e-09
c20466_g1	2.47089562316896	54.9061996975548	-4.4739	1.3556e-10	6.6054e-09
c69037_g1	0.689777242353385	28.7353522033995	-5.3806	1.3917e-10	6.775e-09
c58357_g1	830.244516959114	126.470991325451	2.7147	1.3934e-10	6.7768e-09
c66717_g2	159.382313757244	778.740063209015	-2.2887	1.4304e-10	6.9497e-09
c68425_g1	1175.77044157905	346.269925047671	1.7636	1.441e-10	6.9948e-09
c62325_g1	292.530768156477	75.1688401155895	1.9604	1.4846e-10	7.1996e-09
c67960_g1	4850.85115310569	1489.16783137931	1.7037	1.4919e-10	7.2283e-09
c68383_g1	721.197297595577	208.481875959361	1.7905	1.5086e-10	7.3023e-09
c11547_g1	181.965236220569	42.0541313768824	2.1133	1.5872e-10	7.6754e-09
c57496_g1	24.7908838171362	0	Inf	1.5973e-10	7.717e-09
c65782_g1	556.271549724745	1822.76038301213	-1.7123	1.6327e-10	7.8804e-09
c65507_g1	34.3196642821148	270.140536839796	-2.9766	1.6529e-10	7.9702e-09
c81046_g1	426.259516432555	115.937199706765	1.8784	1.657e-10	7.9825e-09
c79860_g1	1847.38596470467	7328.24680009094	-1.988	1.7056e-10	8.2092e-09
c40056_g1	3.52445324500974	139.498910761224	-5.3067	1.7507e-10	8.4181e-09
c15436_g1	20540.6998366726	5260.79128726718	1.9651	1.7954e-10	8.6249e-09
c29222_g1	52.0189769884048	4.99839637648474	3.3795	1.8105e-10	8.6896e-09
c57563_g1	262.908074185463	3625.27049168939	-3.7855	1.9519e-10	9.3595e-09
c68046_g1	2956.49444283092	909.392749264287	1.7009	1.9551e-10	9.3657e-09
c62841_g1	69.6139174966207	356.902423411635	-2.3581	1.9669e-10	9.4133e-09
c67746_g9	134.243254694339	26.4349007197373	2.3443	1.9875e-10	9.503e-09
c53055_g1	130.911657115785	1.04834144897922	6.9643	2.0249e-10	9.6728e-09
c65817_g2	20.1620312005385	111.331990274823	-2.4652	2.1505e-10	1.0263e-08
c65907_g1	177.9534069434	613.765433678984	-1.7862	2.2164e-10	1.0568e-08
c63022_g1	10787.9443803646	34742.0215142855	-1.6873	2.2717e-10	1.082e-08
c91760_g1	7842.62894474639	2439.18804992453	1.6849	2.2734e-10	1.082e-08
c93155_g1	63.9134261228642	254.114408760316	-1.9913	2.3172e-10	1.1018e-08
c66632_g2	3.34951954963592	42.0254713123721	-3.6492	2.4386e-10	1.1584e-08
c62554_g2	3981.35707513655	1239.63174213482	1.6833	2.4424e-10	1.1591e-08
c57547_g2	1.09134113846219	29.9335697285098	-4.7776	2.4961e-10	1.1835e-08
c65211_g1	94.6981084611872	347.065423464614	-1.8738	2.7365e-10	1.2963e-08
c74299_g1	76.4722142585543	11.5470808728491	2.7274	2.7403e-10	1.2969e-08
c13019_g2	828.398064744787	2641.06096037638	-1.6727	2.7504e-10	1.3005e-08
c22086_g1	930.272903529377	207.202407424709	2.1666	2.7585e-10	1.3031e-08
c66498_g1	156.023403860414	547.706810157333	-1.8116	2.8445e-10	1.3425e-08
c65612_g1	1695.07175696292	520.721216295711	1.7028	2.8523e-10	1.345e-08
c58462_g1	8.16235511239101	219.364038050843	-4.7482	2.8933e-10	1.363e-08
c97380_g1	7239.19576824189	2279.67013412013	1.667	2.9318e-10	1.3799e-08
c74196_g1	321.322226195817	21.1753197664852	3.9236	3.0923e-10	1.4541e-08
c67428_g9	0.363780379487397	25.4628155765783	-6.1292	3.1509e-10	1.4803e-08
c93972_g1	143.218035713207	2.34314190050118	5.9336	3.206e-10	1.5048e-08
c65516_g1	655.263492919991	2557.20008703975	-1.9644	3.2502e-10	1.5241e-08
c42917_g1	291.58541375057	77.9802669359669	1.9027	3.2607e-10	1.5277e-08
c68628_g1	192.297516338982	669.300862450057	-1.7993	3.2849e-10	1.5376e-08
c62498_g2	26.3239774709346	0.368553859333301	6.1584	3.4326e-10	1.6038e-08
c64734_g1	850.419304058041	198.718302940545	2.0974	3.43e-10	1.6038e-08
c46204_g1	177.725013698692	606.962884071359	-1.772	3.48e-10	1.6244e-08
c52709_g1	328.907100561681	88.386729898043	1.8958	3.552e-10	1.6566e-08
c56705_g1	29.3294899213799	133.593388710644	-2.1874	3.6691e-10	1.7096e-08
c58528_g2	3.34951954963592	41.1646946698492	-3.6194	3.7639e-10	1.7506e-08
c74240_g1	1195.92604529608	365.148404573216	1.7116	3.7622e-10	1.7506e-08
c97460_g1	10.2817620988269	72.5865101880209	-2.8196	3.7782e-10	1.7556e-08
c52405_g1	33.4064993309972	1.37017791217241	4.6077	3.9664e-10	1.8414e-08
c43234_g1	974.206515820192	295.887811922966	1.7192	4.0357e-10	1.8719e-08
c51149_g1	578.513113653272	1852.55508116838	-1.6791	4.0525e-10	1.878e-08
c15388_g1	593.672373820406	1868.21298336388	-1.6539	4.0808e-10	1.886e-08
c61303_g1	2268.35537428113	7115.45510228891	-1.6493	4.0767e-10	1.886e-08
c8299_g1	99.3289368187376	5223.22478842018	-5.7166	4.0804e-10	1.886e-08
c67040_g5	3566.75178954032	14265.3062764376	-1.9998	4.3035e-10	1.9871e-08
c65242_g1	16.207262427333	90.7806161739854	-2.4857	4.3312e-10	1.9981e-08
c19390_g1	31872.3648841775	9786.07678975414	1.7035	4.3413e-10	2.0009e-08
c97781_g1	308.510262031487	83.2749878452658	1.8894	4.3575e-10	2.0066e-08
c65570_g1	479.802700955903	138.100904257699	1.7967	4.447e-10	2.0459e-08
c56366_g1	25.926581721404	0.368553859333301	6.1364	4.5086e-10	2.0724e-08
c55110_g1	15.8574659355788	99.4016784584472	-2.6481	4.5373e-10	2.0837e-08
c12125_g1	201.219799629619	3461.9389849583	-4.1047	4.5444e-10	2.0851e-08
c86069_g1	538.027852581079	156.544433757064	1.7811	4.5847e-10	2.0998e-08
c97367_g1	31.0769220331589	1.00162405283911	4.9554	4.583e-10	2.0998e-08
c59117_g1	1173.21458454627	255.553107776222	2.1988	4.8281e-10	2.2094e-08
c91886_g1	311.192590749384	82.4930162828415	1.9155	4.8393e-10	2.2125e-08
c67115_g2	211.353975083846	703.918813937156	-1.7357	4.8962e-10	2.2365e-08
c68295_g1	943.075637883262	0.708447654156262	10.378	4.9634e-10	2.2652e-08
c74352_g1	67.8510929481035	254.711268428519	-1.9084	5.087e-10	2.3195e-08
c75067_g1	28.3415417936401	0.670758923831035	5.401	5.2748e-10	2.403e-08
c22485_g1	0.793241152069179	35.867936584894	-5.4988	5.431e-10	2.472e-08
c61929_g1	226.895600994125	24.7576996798272	3.1961	5.5342e-10	2.5167e-08
c99101_g1	36.035102269836	2.04996550181833	4.1357	5.8471e-10	2.6566e-08
c91789_g1	2762.91646709943	873.566559674247	1.6612	6.2164e-10	2.8219e-08
c41554_g1	13.3364241540406	78.2475156676916	-2.5527	6.2355e-10	2.8255e-08
c74241_g1	34.5200188523622	150.409030712528	-2.1234	6.2342e-10	2.8255e-08
c86677_g1	133.918737279471	6.23675554415577	4.4244	6.2455e-10	2.8276e-08
c63245_g1	1949.17524778245	18932.7029419393	-3.2799	6.2621e-10	2.8326e-08
c66154_g1	787.914286050068	4307.24014640912	-2.4507	6.4868e-10	2.9316e-08
c42897_g1	262.999941943802	1500.6822260517	-2.5125	6.5473e-10	2.9563e-08
c40034_g1	139.423392756834	4260.90762939491	-4.9336	6.7208e-10	3.032e-08
c21547_g1	75.6774762922374	500.406616580905	-2.7252	6.8736e-10	3.0982e-08
c57573_g1	1266.98098938974	396.240233807549	1.6769	7.0147e-10	3.159e-08
c87103_g1	492.15322362215	143.454798848401	1.7785	7.0276e-10	3.162e-08
c52047_g1	821.3770670958	251.226725634118	1.7091	7.0745e-10	3.1804e-08
c67097_g1	9.30539275621437	65.2085777624587	-2.8089	7.3993e-10	3.3234e-08
c64421_g1	442.985129694566	1429.21607424139	-1.6899	7.4206e-10	3.3301e-08
c39712_g1	540.578585047868	1728.05114837168	-1.6766	7.5388e-10	3.3802e-08
c67293_g1	47.1216134068659	189.102377098117	-2.0047	7.7679e-10	3.4798e-08
c85774_g1	442.094143126351	128.956970439913	1.7775	7.9121e-10	3.5413e-08
c50432_g1	282.740440637204	2260.53338599365	-2.9991	7.9215e-10	3.5424e-08
c67990_g1	620.104965068682	187.085146012122	1.7288	8.3542e-10	3.7327e-08
c67197_g9	4.94588849392271	46.5928083907152	-3.2358	8.3895e-10	3.7452e-08
c38555_g1	574.166830756035	172.239784468767	1.7371	8.6788e-10	3.8672e-08
c43014_g1	395.52116660099	112.496961785488	1.8139	8.6724e-10	3.8672e-08
c8359_g1	28.3835643558332	0.330865129008074	6.4227	8.6855e-10	3.8672e-08
c74027_g1	290.047669055796	80.3748484338052	1.8515	8.7141e-10	3.8765e-08
c64325_g1	4059.6853660137	16339.5514363098	-2.0089	9.3161e-10	4.1407e-08
c50764_g1	335.307028288406	1215.41755461868	-1.8579	9.3599e-10	4.1566e-08
c37635_g1	631.72112366354	1968.95991470592	-1.6401	9.4151e-10	4.1775e-08
c92044_g1	26.1590013147026	121.118391316498	-2.211	9.6316e-10	4.2698e-08
c43378_g1	1.54460153993216	32.0703942690289	-4.3759	9.7254e-10	4.3076e-08
c67936_g1	729.476462414476	93619.5947138655	-7.0038	9.9453e-10	4.4013e-08
c61153_g1	191.773251680002	47.9598381687563	1.9995	9.9594e-10	4.4037e-08
c47311_g2	76.4706639115623	12.2153868844447	2.6462	9.9879e-10	4.4125e-08
c66710_g2	4.16084183702311	45.380144776697	-3.4471	1.0389e-09	4.5856e-08
c19430_g1	305.963228215435	84.5964585576533	1.8547	1.0959e-09	4.833e-08
c60717_g1	1012.97953586076	317.586291926925	1.6734	1.0976e-09	4.8364e-08
c61471_g2	39.5495270767104	3.11793834949301	3.665	1.1372e-09	5.0067e-08
c64701_g1	249.528970578042	1049.44040386781	-2.0723	1.1596e-09	5.1006e-08
c57539_g1	69.8890726097395	260.234901489333	-1.8967	1.1668e-09	5.128e-08
c8189_g1	43.9584645397442	174.951249233316	-1.9927	1.2103e-09	5.3147e-08
c27073_g1	963.695191421746	300.23212436427	1.6825	1.2223e-09	5.3629e-08
c80670_g1	595.349388766568	182.148096743959	1.7086	1.3513e-09	5.9238e-08
c91626_g1	6573.74401529166	2198.47909004818	1.5802	1.3817e-09	6.0519e-08
c65700_g2	174.366320466535	577.888429157076	-1.7287	1.3853e-09	6.0623e-08
c54959_g1	11.2376452035156	189.164842147706	-4.0732	1.3902e-09	6.0784e-08
c57525_g2	15833.8531949047	4173.04409412461	1.9238	1.418e-09	6.195e-08
c42993_g2	55110.7648339263	18277.7496485983	1.5922	1.4562e-09	6.3507e-08
c47341_g1	84.6815974690815	3.52418093915154	4.5867	1.4552e-09	6.3507e-08
c59641_g3	77.9341217226684	683.946167259225	-3.1336	1.466e-09	6.3882e-08
c51175_g2	5535.43531279182	1814.85945425685	1.6088	1.4701e-09	6.4006e-08
c70113_g1	130.38419809589	29.8001769169428	2.1294	1.4756e-09	6.4192e-08
c68248_g1	69.2247162422597	10.5414298407088	2.7152	1.493e-09	6.4893e-08
c56967_g1	9188.35348958922	55.3466075360476	7.3752	1.523e-09	6.6139e-08
c53982_g1	4.85633757294667	45.2201775663074	-3.219	1.5277e-09	6.6286e-08
c56502_g1	781.839942795025	244.816060288475	1.6752	1.595e-09	6.9147e-08
c62747_g1	82.7622079241748	7.62253787572252	3.4406	1.6968e-09	7.3502e-08
c14925_g1	30.8067189232389	1.37017791217241	4.4908	1.7265e-09	7.4662e-08
c50934_g1	21.9283109380069	0	Inf	1.728e-09	7.4662e-08
c91593_g1	1181.7442679173	5.10900965522498	7.8537	1.7268e-09	7.4662e-08
c62972_g2	246.745885449255	32.688323151731	2.9162	1.7991e-09	7.7603e-08
c63248_g1	101.525035791447	9.5226273014097	3.4143	1.7985e-09	7.7603e-08
c3327_g1	1.52080191104397	33.0361831439252	-4.4411	1.8053e-09	7.7803e-08
c53316_g1	1248.6531400562	406.3723214145	1.6195	1.81e-09	7.7943e-08
c65814_g6	0.363780379487397	23.2605210863934	-5.9987	1.8283e-09	7.8663e-08
c58824_g1	351.876140951633	1848.47652216382	-2.3932	1.8329e-09	7.8793e-08
c53507_g3	28.9278551262777	1.1056615779999	4.7095	1.8363e-09	7.8875e-08
c39734_g1	24.8196354492232	2974.80595719431	-6.9052	1.8424e-09	7.9069e-08
c59753_g1	62.2811076049218	228.314615409741	-1.8742	1.9073e-09	8.1787e-08
c59533_g1	8.73058730971059	60.6999512569281	-2.7975	1.9462e-09	8.3385e-08
c85927_g1	3.90624386082168	42.6389101071824	-3.4483	1.9607e-09	8.3936e-08
c65090_g1	155.087098705291	18.2424933112132	3.0877	1.9821e-09	8.478e-08
c22540_g1	138.771939425936	452.672647510408	-1.7058	1.9867e-09	8.4907e-08
c59298_g5	552.687305709007	172.697003547172	1.6782	2.0531e-09	8.7672e-08
c15584_g1	1369.51527956997	437.872955978354	1.6451	2.0653e-09	8.8117e-08
c42526_g1	225.27608787814	60.2431479151022	1.9028	2.0965e-09	8.9375e-08
c74301_g1	59.0613275954893	8.32353093112958	2.8269	2.0998e-09	8.944e-08
c91763_g1	5.46482928848707	48.8732127391028	-3.1608	2.1035e-09	8.9523e-08
c66732_g2	202.233969855102	16.7330420557902	3.5953	2.1434e-09	9.1146e-08
c66375_g1	47.8703559951426	5.10155505647577	3.2301	2.2236e-09	9.4478e-08
c15229_g1	53.8122453139878	4.98936771066985	3.431	2.2804e-09	9.681e-08
c60626_g1	361.739595669044	106.777525218322	1.7603	2.3131e-09	9.8116e-08
c97440_g1	731.718305368055	231.081082524317	1.6629	2.3388e-09	9.9127e-08
c60675_g1	127.716602389848	426.370588732416	-1.7392	2.3778e-09	1.007e-07
c15059_g1	222.900390770524	710.22033610827	-1.6719	2.3952e-09	1.0135e-07
c62261_g1	1566.04525876048	4684.96785425175	-1.5809	2.4131e-09	1.0202e-07
c42900_g1	190.895748738874	597.488597841207	-1.6461	2.4406e-09	1.0301e-07
c68444_g1	592.431468862395	186.992174328432	1.6637	2.4402e-09	1.0301e-07
c54410_g1	2.88637250801752	36.5560576184589	-3.6628	2.4716e-09	1.0423e-07
c37118_g1	20.9108446878087	0	Inf	2.4913e-09	1.0498e-07
c66633_g1	65.5754045612519	10.2137128458321	2.6826	2.5104e-09	1.057e-07
c36422_g1	29.9223056042083	132.068100922521	-2.142	2.5433e-09	1.0691e-07
c42976_g1	9427.36584848356	28012.8122497171	-1.5712	2.5425e-09	1.0691e-07
c61262_g1	13.7963996026817	78.3188661490409	-2.5051	2.589e-09	1.0865e-07
c65256_g1	3.40538420157534	50.0238340229033	-3.8767	2.589e-09	1.0865e-07
c4264_g1	6.43872262950024	211.024798737464	-5.0345	2.5944e-09	1.0878e-07
c67108_g1	48.248403858337	807.380351195086	-4.0647	2.6104e-09	1.093e-07
c67287_g4	96.292767894246	1364.77590068277	-3.8251	2.6109e-09	1.093e-07
c91511_g1	608.884222514709	1877.60740204549	-1.6247	2.6151e-09	1.0938e-07
c67454_g3	86.1579181825821	15.9844527590732	2.4303	2.6871e-09	1.123e-07
c37047_g1	315.63842080693	91.0932403480899	1.7929	2.7154e-09	1.134e-07
c56593_g1	750.39596315791	2246.47125260112	-1.5819	2.7242e-09	1.1367e-07
c97699_g1	148.36783959782	478.085415051461	-1.6881	2.7573e-09	1.1496e-07
c40772_g1	2.63594267839435	35.1687012198265	-3.7379	2.7698e-09	1.1538e-07
c63571_g1	20.941217565881	106.106486809174	-2.3411	2.802e-09	1.1663e-07
c97429_g1	947.059769705348	306.275850306865	1.6286	2.8156e-09	1.171e-07
c67691_g1	7209.32391378745	2436.74536996542	1.5649	2.8365e-09	1.1787e-07
c86141_g1	1263.28136698444	413.776460992337	1.6103	2.8597e-09	1.1874e-07
c97550_g1	202.345291131269	646.144665356934	-1.675	2.8648e-09	1.1886e-07
c80295_g1	927.41167916512	296.477504578549	1.6453	2.9842e-09	1.2371e-07
c30398_g1	1302.46399302625	391.282578433478	1.735	2.9877e-09	1.2376e-07
c64632_g2	342.95052293609	70.3038365506718	2.2863	3.0859e-09	1.2772e-07
c57522_g1	1667.15133110621	1.44555537282286	10.172	3.0897e-09	1.2777e-07
c20319_g1	73.5266637076331	12.0196722573431	2.6129	3.1647e-09	1.3077e-07
c56524_g2	1.71953523530598	30.3014283659472	-4.1393	3.1782e-09	1.3122e-07
c46710_g1	676.558712390398	2572.67105774441	-1.927	3.3134e-09	1.3669e-07
c56966_g1	85.274430518159	15.5994156351758	2.4506	3.3429e-09	1.378e-07
c68859_g1	294.339411552549	84.4551480387464	1.8012	3.4194e-09	1.4084e-07
c67435_g1	25.7713504073336	0.661730258016148	5.2834	3.5461e-09	1.4594e-07
c64058_g2	1.35575485581858	28.2007184886877	-4.3786	3.5778e-09	1.4712e-07
c60300_g1	277.211857131523	79.2163568146763	1.8071	3.6031e-09	1.4804e-07
c16395_g1	9887.84831766336	3413.53827205389	1.5344	3.7474e-09	1.5375e-07
c66804_g1	95.2653441049058	14.3145226946385	2.7345	3.7479e-09	1.5375e-07
c81880_g1	36.3429470983905	2.73132715852993	3.734	3.7547e-09	1.539e-07
c63852_g2	37.9951806946167	153.457424761043	-2.014	3.7615e-09	1.5406e-07
c50942_g2	56.0763549157121	3668.87306993199	-6.0318	3.8419e-09	1.5723e-07
c65847_g1	84.5641670378817	16.2965653345556	2.3755	3.9763e-09	1.626e-07
c85982_g1	2396.03947819561	693.117325561759	1.7895	4.2461e-09	1.7349e-07
c45888_g1	143.398935331629	542.080080872144	-1.9185	4.256e-09	1.7375e-07
c40058_g1	211.216041048473	650.550636680283	-1.6229	4.4687e-09	1.8229e-07
c56506_g1	3409.82714445505	1081.66546685575	1.6564	4.4961e-09	1.8327e-07
c66717_g3	72.1906821321114	327.913573343523	-2.1834	4.6436e-09	1.8913e-07
c65405_g1	1774.7974508985	595.194153921659	1.5762	4.6757e-09	1.9028e-07
c61283_g1	1.05765486942557	28.070473811252	-4.7301	4.6897e-09	1.907e-07
c4668_g1	768.917356913599	248.084154199416	1.632	4.6955e-09	1.9078e-07
c64455_g1	240.882374859973	760.944523437507	-1.6595	4.7518e-09	1.9292e-07
c39929_g1	24.5642536164012	392.798158535514	-3.9992	4.7727e-09	1.9361e-07
c58542_g1	838.82885533572	2516.35958967185	-1.5849	4.7791e-09	1.9372e-07
c64969_g2	128.969176931925	30.6790108910954	2.0717	4.7999e-09	1.9441e-07
c53558_g1	172.457562718206	527.798382590599	-1.6137	4.8835e-09	1.9764e-07
c67620_g1	555.32863118625	1856.70511344433	-1.7413	4.9695e-09	2.0096e-07
c45673_g1	1633.46068948655	543.861640429771	1.5866	5.0251e-09	2.0305e-07
c58693_g2	163.736613185169	21.1629593432652	2.9518	5.0619e-09	2.0437e-07
c66148_g1	977.633356077661	322.126031409202	1.6017	5.1017e-09	2.0582e-07
c74118_g1	1192.59391272438	3603.34349927369	-1.5952	5.1405e-09	2.0722e-07
c7126_g1	492.317716883984	155.092302630662	1.6665	5.2493e-09	2.1144e-07
c69597_g1	149.581262208458	457.239106861601	-1.612	5.2675e-09	2.12e-07
c15249_g1	2.62195879066113	34.0736423747072	-3.6999	5.4325e-09	2.1835e-07
c54903_g2	585.341085668188	170.303764003094	1.7812	5.4337e-09	2.1835e-07
c15604_g1	448.614917773036	140.26865815169	1.6773	5.4648e-09	2.1942e-07
c91639_g1	1236.88492857593	412.690006975641	1.5836	5.4824e-09	2.1996e-07
c59298_g4	54.8230138832641	0	Inf	5.6063e-09	2.2475e-07
c38534_g1	947.352686191316	315.461644186352	1.5864	5.6151e-09	2.2493e-07
c63041_g1	1674.73798246023	560.453643351159	1.5793	5.6258e-09	2.2518e-07
c76116_g1	154.496741657813	39.3670687022572	1.9725	5.6533e-09	2.2611e-07
c36256_g1	399.595734741506	1309.44083841325	-1.7123	5.7473e-09	2.2968e-07
c64872_g1	722.85191892816	234.187771409066	1.626	5.767e-09	2.3029e-07
c65409_g5	799.613201288573	2351.2551092494	-1.5561	5.7843e-09	2.308e-07
c59298_g1	28.0770571772902	0	Inf	5.9504e-09	2.3725e-07
c64226_g1	1760.33728598793	604.287806472594	1.5425	6.0032e-09	2.3917e-07
c36706_g1	385.37080002085	1162.22581174997	-1.5926	6.0203e-09	2.3966e-07
c97495_g1	349.576476405408	1036.92099763769	-1.5686	6.1249e-09	2.4363e-07
c7271_g1	2706.31040859797	929.133298896084	1.5424	6.261e-09	2.4885e-07
c85974_g1	469.190463516027	148.663539564169	1.6581	6.4196e-09	2.5496e-07
c59589_g1	56.1133010429687	8.26778486917457	2.7628	6.4614e-09	2.5642e-07
c58217_g1	215.385790338293	59.9860861796789	1.8442	6.49e-09	2.5736e-07
c61937_g1	1069.20615272109	3089.11755746922	-1.5307	6.628e-09	2.6262e-07
c63322_g1	111.901425246187	5.80185288998691	4.2696	6.636e-09	2.6274e-07
c85885_g1	483.496352036467	152.417879864573	1.6655	6.6576e-09	2.6339e-07
c40291_g1	27.2699739354748	1.03028411734945	4.7262	6.8675e-09	2.7148e-07
c59954_g1	380.947932202827	1137.74363877297	-1.5785	6.8876e-09	2.7207e-07
c73988_g1	3509.89946285442	10021.6166717064	-1.5136	7.191e-09	2.8383e-07
c67540_g2	53.6555345519189	195.667264255709	-1.8666	7.2263e-09	2.85e-07
c63791_g1	17.5851956660544	392.262572065145	-4.4794	7.394e-09	2.9139e-07
c42949_g1	40.8479378325911	4.2326285933078	3.2706	7.4082e-09	2.9173e-07
c54796_g1	584.230866139231	188.450785346371	1.6324	7.4481e-09	2.9307e-07
c12635_g1	25140.5122889158	8770.02289674362	1.5194	7.5574e-09	2.9692e-07
c65106_g5	186.009006089052	616.175014371592	-1.728	7.5551e-09	2.9692e-07
c29923_g1	450.618981102405	142.520818172147	1.6607	7.5926e-09	2.9807e-07
c64115_g1	480.272971072404	151.311755177983	1.6663	7.7034e-09	3.0219e-07
c65132_g1	47.9664801653028	180.248749912179	-1.9099	7.7265e-09	3.0286e-07
c47280_g2	830.113679262993	274.223929106045	1.598	7.8613e-09	3.0791e-07
c66473_g4	3124.68082818616	1078.41871689788	1.5348	7.9466e-09	3.1101e-07
c2316_g1	1802.10715332674	609.926974838243	1.563	8.1448e-09	3.1828e-07
c39980_g1	153.905405422983	677.779621070736	-2.1388	8.14e-09	3.1828e-07
c67490_g5	18582.4427288776	6551.45621697489	1.5041	8.1559e-09	3.1847e-07
c53404_g1	1496.02049259057	4288.37962890251	-1.5193	8.2195e-09	3.2071e-07
c22484_g1	986.267177158578	328.322045950944	1.5869	8.2271e-09	3.2076e-07
c67800_g4	653.033229851238	215.953012181918	1.5964	8.4055e-09	3.2747e-07
c61667_g1	366.847643221189	1096.52203049184	-1.5797	8.4499e-09	3.2895e-07
c40136_g1	11516.805257646	4042.71646657715	1.5103	8.477e-09	3.2975e-07
c55138_g1	585.442131076741	1702.57623325971	-1.5401	8.4849e-09	3.2981e-07
c75188_g1	19.2611579921753	0	Inf	8.512e-09	3.3061e-07
c74130_g1	164.295207605815	494.824841136745	-1.5906	9.0888e-09	3.5274e-07
c63030_g2	67.5346991294121	233.811714460951	-1.7916	9.1186e-09	3.5363e-07
c67162_g7	27.4408103832638	422.112919418132	-3.9432	9.2213e-09	3.5734e-07
c67483_g1	327.289425356355	100.502801458524	1.7033	9.3146e-09	3.6069e-07
c54781_g1	4298.43266869323	1502.73964966616	1.5162	9.3828e-09	3.6305e-07
c54856_g1	849.741802960488	0.708447654156262	10.228	9.4212e-09	3.6426e-07
c61852_g2	525.710834251694	170.433594061971	1.6251	9.4537e-09	3.6524e-07
c8092_g1	263.873382369844	892.387530700746	-1.7578	9.7466e-09	3.7627e-07
c65616_g2	835.016299777646	279.480178301892	1.5791	9.8988e-09	3.8186e-07
c39772_g1	53.3722023098797	4.43982479845963	3.5875	1.0109e-08	3.8966e-07
c60877_g1	4.4449579356829	40.8295230762233	-3.1994	1.0177e-08	3.9199e-07
c61430_g1	819.977614899059	274.440025826561	1.5791	1.02e-08	3.9258e-07
c8014_g2	203346.681367539	71917.927931817	1.4995	1.0234e-08	3.9361e-07
c53361_g1	46.8119346353456	4.84606738811815	3.272	1.0373e-08	3.9866e-07
c63858_g1	218.457749672204	659.423510698725	-1.5939	1.0383e-08	3.9873e-07
c55898_g1	36.9876010845669	3.36439735203574	3.4586	1.0491e-08	4.0257e-07
c66341_g1	5.95177595899365	46.8099121068517	-2.9754	1.0547e-08	4.0441e-07
c97382_g1	20531.6282010982	5462.32158912097	1.9103	1.058e-08	4.0538e-07
c64208_g1	39.2466168851055	1.71910037281026	4.5128	1.0621e-08	4.0664e-07
c46675_g1	56.9797041256747	8.58489913117073	2.7306	1.0719e-08	4.101e-07
c47280_g1	278.688319643011	83.5018154491131	1.7388	1.0746e-08	4.105e-07
c65205_g3	1.77123174066714	29.8868523323697	-4.0767	1.0743e-08	4.105e-07
c63883_g2	197.460525656397	39.5412983782808	2.3201	1.0791e-08	4.1194e-07
c63940_g1	756.538805003756	2167.70319563715	-1.5187	1.0882e-08	4.151e-07
c66998_g1	5.56829319820286	46.6830950488641	-3.0676	1.1075e-08	4.2213e-07
c53590_g1	29.8105763003294	1.73873177150571	4.0997	1.1116e-08	4.234e-07
c97605_g1	54.5940494789166	627.450368154368	-3.5227	1.1191e-08	4.2594e-07
c64097_g5	458.179448513246	147.91309671507	1.6312	1.1256e-08	4.2808e-07
c66952_g4	25.8681701688717	108.476115347267	-2.0681	1.1343e-08	4.3108e-07
c45899_g1	333.905611215572	983.2924521936	-1.5582	1.1362e-08	4.3147e-07
c42922_g1	92.3997414307861	19.2637487627477	2.262	1.1373e-08	4.3158e-07
c67040_g4	608.716615160334	1771.98372462766	-1.5415	1.1445e-08	4.3397e-07
c40713_g2	24.142987338989	106.924253160321	-2.1469	1.1696e-08	4.4317e-07
c27457_g1	7.10060299538065	48.3078817842244	-2.7662	1.1739e-08	4.4445e-07
c39773_g1	718.079147552894	2376.00520199243	-1.7263	1.177e-08	4.4529e-07
c60458_g1	231.85513227937	691.812003155795	-1.5772	1.1914e-08	4.5042e-07
c79907_g1	223.242617459493	667.090321159164	-1.5793	1.2059e-08	4.5557e-07
c61043_g1	1059.85373583443	360.951570768631	1.554	1.2161e-08	4.5908e-07
c67599_g1	975.795823219207	2795.63350480873	-1.5185	1.221e-08	4.6061e-07
c55638_g1	1.56840116882035	28.087652297712	-4.1626	1.2221e-08	4.6066e-07
c64100_g1	1900.3726444495	5375.54906921454	-1.5001	1.2582e-08	4.7392e-07
c54988_g1	821.340655961689	279.03319470982	1.5575	1.2844e-08	4.8343e-07
c68195_g1	303.865574217941	77.6755604692022	1.9679	1.338e-08	5.0325e-07
c80625_g1	453.420666427403	145.506754153865	1.6398	1.3536e-08	5.0836e-07
c97306_g1	53523.4387858	19094.0095171068	1.4871	1.3532e-08	5.0836e-07
c64947_g3	31.0333491239739	2.18266309148946	3.8297	1.4129e-08	5.3026e-07
c36629_g1	230.794447614954	66.5880638257628	1.7933	1.4148e-08	5.3056e-07
c68159_g1	348.258340500285	1287.53211915089	-1.8864	1.424e-08	5.3363e-07
c66672_g2	728.149548889984	242.893790689814	1.5839	1.4572e-08	5.4567e-07
c80934_g1	193.093486323818	55.4047187490071	1.8012	1.4597e-08	5.4618e-07
c66912_g4	31.2377300428126	2.10728563083901	3.8898	1.4701e-08	5.497e-07
c91754_g1	1107.45226350598	379.107477543668	1.5466	1.4719e-08	5.4997e-07
c74073_g1	2302.04847651576	801.428504300529	1.5223	1.4819e-08	5.5329e-07
c10841_g1	41.254365466656	1.66335431085526	4.6324	1.4896e-08	5.5578e-07
c91715_g1	69.8627260802585	12.9624021140959	2.4302	1.491e-08	5.5588e-07
c20869_g1	287.17613265743	1.01968138446888	8.1377	1.5403e-08	5.7383e-07
c60798_g1	61.771216061141	6.20721663447568	3.3149	1.5484e-08	5.7603e-07
c63447_g1	131.293124001435	25.3835947599005	2.3708	1.548e-08	5.7603e-07
c61613_g1	1097.13371444413	376.330591319485	1.5437	1.5692e-08	5.8332e-07
c65358_g1	2178.83199031878	768.907458605863	1.5027	1.5714e-08	5.8373e-07
c86886_g1	97.7356150356904	22.062303561283	2.1473	1.6061e-08	5.9617e-07
c47291_g1	435.504539261533	140.688931093678	1.6302	1.6095e-08	5.9702e-07
c5077_g1	2240.21652119986	790.511665361591	1.5028	1.6397e-08	6.0777e-07
c62117_g1	119.862588398966	371.119309930251	-1.6305	1.643e-08	6.0857e-07
c57831_g1	5116.46342549435	1813.9312710978	1.496	1.6942e-08	6.2705e-07
c59664_g2	25.9520025962776	1.04834144897922	4.6297	1.7371e-08	6.4248e-07
c58911_g1	28.0295288185073	116.276814016271	-2.0525	1.7396e-08	6.4292e-07
c68025_g1	2764.16654964617	974.932239527765	1.5035	1.7727e-08	6.5469e-07
c25591_g1	4.46875756457109	39.8082676246887	-3.1551	1.7939e-08	6.6205e-07
c66390_g2	166.851915365035	44.7999046243202	1.897	1.7963e-08	6.6245e-07
c15761_g1	1874.68324042786	656.085703947136	1.5147	1.8157e-08	6.6911e-07
c22616_g1	3.56216586263769	36.1475457398388	-3.3431	1.8364e-08	6.7627e-07
c59412_g1	741.814812368017	2125.20284085642	-1.5185	1.8426e-08	6.7756e-07
c67798_g2	127.986251706377	33.3751022315355	1.9391	1.8413e-08	6.7756e-07
c15332_g1	219.032501585964	655.796330515261	-1.5821	1.8647e-08	6.8493e-07
c63620_g2	362.173684714663	101.963266028845	1.8286	1.8653e-08	6.8493e-07
c22442_g1	592.021139311476	199.059075580537	1.5725	1.8907e-08	6.9375e-07
c85840_g1	838.844872464842	2395.48557616428	-1.5138	1.9379e-08	7.1057e-07
c50028_g1	1303.79646847525	3686.76112446303	-1.4996	1.9492e-08	7.1421e-07
c32322_g1	106.7094877662	2.10728563083901	5.6622	1.9543e-08	7.1555e-07
c62937_g1	38.4401048029302	2.4848681559872	3.9514	1.976e-08	7.2297e-07
c64715_g1	0.363780379487397	20.3332956774881	-5.8046	1.9998e-08	7.3117e-07
c59320_g1	168.178311262632	511.479452341776	-1.6047	2.0563e-08	7.5128e-07
c41755_g1	47.5163913568101	2.1163142966539	4.4888	2.0667e-08	7.5456e-07
c66897_g3	14.3547451598529	73.3488503517498	-2.3532	2.085e-08	7.607e-07
c63290_g1	72.8486070483939	13.7740084482432	2.403	2.0896e-08	7.6183e-07
c31222_g1	161.333697426208	484.037183288778	-1.5851	2.1007e-08	7.6534e-07
c91742_g1	65.9860712408886	695.934735758654	-3.3987	2.1041e-08	7.6602e-07
c34044_g1	1170.60635284448	402.563713257163	1.54	2.1335e-08	7.7615e-07
c85741_g1	940.817685629108	324.63960700171	1.5351	2.1657e-08	7.8733e-07
c66029_g1	9.11654607210079	56.3278172070644	-2.6273	2.1685e-08	7.8778e-07
c41885_g1	201.137680681133	58.6946174855621	1.7769	2.1773e-08	7.9041e-07
c51005_g1	43.012468075204	5.15887518549645	3.0596	2.1881e-08	7.9377e-07
c38279_g1	756.773300902108	2.74938449015971	8.1046	2.1968e-08	7.9613e-07
c67504_g3	116.419420680769	28.5626965944415	2.0271	2.1977e-08	7.9613e-07
c62263_g1	145676.577820447	50820.9233825025	1.5193	2.2029e-08	7.9745e-07
c66049_g12	94.7705039014527	304.844652143699	-1.6856	2.2297e-08	8.0658e-07
c27152_g1	72.7187257102036	9.2973737646281	2.9674	2.2368e-08	8.0859e-07
c61637_g2	20.2267859390255	0	Inf	2.2606e-08	8.1659e-07
c46779_g1	117.520023766995	364.269019729242	-1.6321	2.2704e-08	8.1925e-07
c65567_g1	118.512374072235	481.067819450876	-2.0212	2.2711e-08	8.1925e-07
c63059_g1	54.2624050214739	576.658873524706	-3.4097	2.274e-08	8.1969e-07
c4756_g1	508.968410573075	168.764359219432	1.5926	2.2769e-08	8.2016e-07
c63399_g2	123.763880256589	30.306430052461	2.0299	2.2808e-08	8.2101e-07
c57841_g1	66.5330507099129	220.563639036953	-1.7291	2.2854e-08	8.2207e-07
c64489_g1	23936.6562321073	8641.22908662437	1.4699	2.3407e-08	8.4135e-07
c62436_g1	166.344676353339	1.34151784766207	6.9542	2.3561e-08	8.4632e-07
c60686_g1	90.5717193835721	1224.39159304138	-3.7569	2.4059e-08	8.6359e-07
c42993_g1	92979.3383673955	33830.2081999132	1.4586	2.412e-08	8.6516e-07
c64832_g1	48.7013097648397	173.7968319655	-1.8354	2.4358e-08	8.7308e-07
c61583_g1	524.888735836046	174.527596043892	1.5886	2.4925e-08	8.9216e-07
c74178_g1	1018.01043526786	5357.51829286793	-2.3958	2.492e-08	8.9216e-07
c67687_g2	108.756321347888	12.1106541373879	3.1668	2.5132e-08	8.9894e-07
c62385_g1	4.9081049773013	99.4780306263103	-4.3411	2.5596e-08	9.1489e-07
c47148_g1	785.023719698058	2225.37675989195	-1.5032	2.5693e-08	9.1774e-07
c65694_g2	4129.62331415991	1483.47393763824	1.477	2.5851e-08	9.2272e-07
c43167_g1	936.572147239684	325.036869415586	1.5268	2.5903e-08	9.2395e-07
c39985_g1	991.715494063204	47.2096274329623	4.3928	2.6537e-08	9.459e-07
c74312_g1	281.49507346756	0	Inf	2.6603e-08	9.476e-07
c63237_g1	31.627998749768	0.339893794822961	6.54	2.7108e-08	9.6489e-07
c59136_g1	146.017137971116	445.053113416742	-1.6078	2.7175e-08	9.6663e-07
c66117_g3	49.8626412409615	173.838596165158	-1.8017	2.7386e-08	9.7343e-07
c2309_g1	147.028119237373	40.4480971950478	1.8619	2.7544e-08	9.7837e-07
c63328_g2	751.575339602854	260.027474288896	1.5313	2.76e-08	9.7967e-07
c40636_g1	2151.38626116933	779.983434400053	1.4638	2.7777e-08	9.8461e-07
c66853_g1	1685.58184483341	12805.5553744911	-2.9255	2.7777e-08	9.8461e-07
c63326_g2	752.158149615486	257.48579760251	1.5465	2.7807e-08	9.8498e-07
c66968_g1	501.071319965962	1415.30946182948	-1.498	2.7887e-08	9.8715e-07
c63466_g1	623.062789996108	1739.37042118354	-1.4811	2.8268e-08	9.9993e-07
c67119_g1	1.18082116044476	25.4741135313548	-4.4312	2.8288e-08	9.9995e-07
c64180_g1	210.585392283972	12.5021711528219	4.0742	2.8472e-08	1.0057e-06
c57791_g1	44.4043143026651	5.82806004226181	2.9296	2.9038e-08	1.025e-06
c68003_g1	4.1427607017051	78.0706494561587	-4.2361	2.9778e-08	1.0504e-06
c91630_g1	1287.66822717041	375.67669910839	1.7772	2.9851e-08	1.0523e-06
c86297_g1	1915.89883845744	28.0608457855841	6.0933	3.0222e-08	1.0646e-06
c14979_g1	31.4324370184833	120.087970947886	-1.9338	3.0301e-08	1.0667e-06
c36327_g1	317.636907440717	100.534609657166	1.6597	3.0752e-08	1.0818e-06
c42907_g1	4595.00563625992	1672.94380389121	1.4577	3.0932e-08	1.0874e-06
c5221_g1	17.1654797356341	729.458519978526	-5.4092	3.1045e-08	1.0906e-06
c35032_g1	757.952856349751	260.007243530348	1.5436	3.172e-08	1.1136e-06
c79942_g1	505.534217238976	1415.49600902879	-1.4854	3.2384e-08	1.1361e-06
c67273_g1	1496.87862344342	4188.02109537612	-1.4843	3.2538e-08	1.1407e-06
c55232_g2	1777.03221890825	635.077343999219	1.4845	3.2852e-08	1.1509e-06
c47827_g1	15.0626035375243	76.9193329504622	-2.3524	3.2941e-08	1.1532e-06
c45110_g1	26.8208107815896	1.37017791217241	4.2909	3.3091e-08	1.1577e-06
c47251_g1	28.748965981306	1.44555537282286	4.3138	3.4025e-08	1.1896e-06
c62297_g1	640.187797516541	219.235503691736	1.546	3.4639e-08	1.2102e-06
c65201_g1	53.4553217796584	189.401297777221	-1.825	3.4939e-08	1.2199e-06
c50682_g2	16.2910239557454	78.228579490892	-2.2636	3.5276e-08	1.2308e-06
c57496_g2	20.3623148717925	0.339893794822961	5.9047	3.5408e-08	1.2346e-06
c67631_g1	575.924525336871	200.129125993088	1.5249	3.5785e-08	1.2468e-06
c54637_g1	712.843249370253	151.762821222179	2.2318	3.662e-08	1.2751e-06
c60401_g2	680.048300880596	1889.85856986791	-1.4746	3.6682e-08	1.2763e-06
c95402_g1	33.6873020386927	3.10890968367812	3.4377	3.6957e-08	1.285e-06
c36591_g1	0.793241152069179	23.5658742850224	-4.8928	3.7921e-08	1.3177e-06
c7943_g1	21.6941991997294	0	Inf	3.7973e-08	1.3186e-06
c91747_g1	89.7120313480371	278.740944528318	-1.6356	3.8214e-08	1.3261e-06
c80134_g1	13.6707573100631	533.843152563974	-5.2873	3.8275e-08	1.3272e-06
c91681_g1	1116.92375737146	398.476973031885	1.487	3.8928e-08	1.349e-06
c56665_g1	844.181372196128	291.643846103683	1.5333	3.8973e-08	1.3496e-06
c97571_g1	449.906737913483	149.198868500777	1.5924	3.963e-08	1.3715e-06
c67146_g1	512.669932418648	1432.67957100571	-1.4826	4.0691e-08	1.4072e-06
c65936_g1	2.56037564515153	30.8756043633667	-3.592	4.1248e-08	1.4255e-06
c42994_g1	30.8444315408668	2.33411323468629	3.7241	4.1343e-08	1.4279e-06
c16057_g1	11.2318558109519	62.7002348517488	-2.4809	4.1425e-08	1.4297e-06
c2043_g1	29.7827503228499	2.15400302697913	3.7894	4.1918e-08	1.4457e-06
c38517_g1	234.925899728949	671.245455455747	-1.5146	4.2822e-08	1.4759e-06
c57251_g1	36.6746624548267	3.83541466946416	3.2573	4.3101e-08	1.4845e-06
c79853_g1	3653.67923778414	1331.50788948135	1.4563	4.3136e-08	1.4848e-06
c66498_g5	61.890072407595	211.385347128227	-1.7721	4.3492e-08	1.496e-06
c59868_g1	61.1044545910553	202.705023401131	-1.73	4.3607e-08	1.4983e-06
c66273_g1	497.260044557464	167.979790392698	1.5657	4.3617e-08	1.4983e-06
c55766_g1	815.565383241087	0.330865129008074	11.267	4.4122e-08	1.5146e-06
c66881_g5	423.419480398988	141.511603269296	1.5812	4.4221e-08	1.517e-06
c56130_g1	316.31400146457	102.031884112642	1.6323	4.4523e-08	1.5263e-06
c61669_g2	7326.1456828019	2732.00105048496	1.4231	4.4689e-08	1.531e-06
c65586_g1	4764.20608565508	1123.51856914212	2.0842	4.488e-08	1.5365e-06
c15391_g1	802.397390036449	2205.45563482265	-1.4587	4.5236e-08	1.5476e-06
c55828_g1	1187.40218650738	3231.49475320823	-1.4444	4.5661e-08	1.5611e-06
c62373_g2	50.8053243145374	7.9369197401665	2.6783	4.6728e-08	1.5966e-06
c16876_g1	975.262145445095	349.467131585853	1.4806	4.8976e-08	1.6716e-06
c42131_g1	17.0464815911932	80.4089732934199	-2.2379	4.899e-08	1.6716e-06
c62884_g2	17182.5940983261	6353.48122574297	1.4353	5.0098e-08	1.7083e-06
c65039_g1	268.700414517313	55.8050808069821	2.2675	5.0658e-08	1.7262e-06
c46268_g1	80.195400827826	251.446329634502	-1.6487	5.0915e-08	1.7338e-06
c8164_g1	97.2132899511683	23.6789404759981	2.0375	5.1977e-08	1.7688e-06
c57956_g1	61.1216100717658	10.5732380393505	2.5313	5.243e-08	1.783e-06
c67138_g5	619.629123658287	214.727476546058	1.5289	5.3093e-08	1.8044e-06
c64346_g2	681.47260819426	1833.55331281309	-1.4279	5.336e-08	1.8123e-06
c39749_g1	6245.71708775389	2324.93394687296	1.4257	5.42e-08	1.8395e-06
c80334_g1	60.5002019210866	1.01968138446888	5.8907	5.4352e-08	1.8435e-06
c67886_g1	33.1800109282491	0	Inf	5.4391e-08	1.8436e-06
c8881_g1	238.949963248436	75.0007230845547	1.6717	5.5461e-08	1.8786e-06
c39753_g1	350.132622721267	0	Inf	5.7189e-08	1.9359e-06
c58572_g1	783.673027878619	277.449844198769	1.498	5.7402e-08	1.9418e-06
c65089_g1	21.5251257959127	213.054533480734	-3.3071	5.7711e-08	1.951e-06
c80202_g1	370.032740407984	1034.63949953563	-1.4834	5.8202e-08	1.9662e-06
c66467_g1	407.402185641107	136.293970138976	1.5797	5.8479e-08	1.9743e-06
c67498_g1	1301.73210755164	3525.59162139075	-1.4374	5.8627e-08	1.978e-06
c8258_g1	171.877343708048	1934.36992929429	-3.4924	5.9156e-08	1.9945e-06
c65619_g1	3.59423088568892	35.2883431643816	-3.2954	6.0537e-08	2.0397e-06
c52196_g1	150.719700910053	0.330865129008074	8.8314	6.1031e-08	2.055e-06
c65881_g4	6.15460653084045	44.3399531483629	-2.8489	6.1337e-08	2.0626e-06
c67292_g6	27.2067695439798	1.78544916764582	3.9296	6.1324e-08	2.0626e-06
c61698_g1	5551.43645377907	6.18013063703102	9.811	6.2067e-08	2.0858e-06
c25119_g1	1959.69848489245	8045.20681537765	-2.0375	6.2399e-08	2.0956e-06
c60038_g1	3.86846034420028	76.164679498788	-4.2993	6.3018e-08	2.115e-06
c32105_g1	15.8796443184816	75.4823431348637	-2.249	6.3217e-08	2.1203e-06
c62409_g2	156.330181236374	464.532032682825	-1.5712	6.3446e-08	2.1265e-06
c56482_g1	1615.55330123986	4316.75337471878	-1.4179	6.5115e-08	2.1805e-06
c64062_g1	173.356123056899	608.133174907034	-1.8106	6.514e-08	2.1805e-06
c11794_g1	0	16.5053356067731	-Inf	6.6198e-08	2.2144e-06
c39975_g1	36.4218275225976	1.68141164248503	4.4371	6.7332e-08	2.2509e-06
c56566_g2	26.8527340066539	1.71007170699537	3.9729	6.8306e-08	2.2815e-06
c65540_g1	1727.13117089228	4618.94838046065	-1.4192	6.8336e-08	2.2815e-06
c67044_g19	50.6856132124694	1.1056615779999	5.5186	6.8539e-08	2.2867e-06
c21895_g1	160.761456246547	46.851028456625	1.7788	6.8962e-08	2.2993e-06
c12960_g1	4698.50633680962	1761.37374166949	1.4155	6.9392e-08	2.3122e-06
c64859_g1	123.417485421041	364.575578630369	-1.5627	7.0484e-08	2.347e-06
c58531_g1	20.0281944127504	0.368553859333301	5.764	7.2083e-08	2.3987e-06
c48860_g1	181.423492350718	54.6741867839199	1.7304	7.2142e-08	2.3991e-06
c57492_g1	166.083115900488	48.0885087791263	1.7881	7.2617e-08	2.4134e-06
c62369_g1	61.1322805685348	211.351454381918	-1.7896	7.3364e-08	2.4366e-06
c63535_g1	19.9862427495507	0.339893794822961	5.8778	7.3794e-08	2.4493e-06
c63338_g1	59.6820227885414	611.480741303643	-3.3569	7.6077e-08	2.5218e-06
c66899_g1	2919.39283183309	1077.25931889192	1.4383	7.6041e-08	2.5218e-06
c64290_g1	163.560577304702	1502.62163598364	-3.1996	7.7367e-08	2.5622e-06
c92135_g1	62.9542831599556	366.69175667576	-2.5422	7.7396e-08	2.5622e-06
c62358_g1	33.0090326824732	3.13756974818846	3.3951	7.8166e-08	2.586e-06
c67543_g2	1127.39470184912	3047.63654911481	-1.4347	7.9163e-08	2.6173e-06
c62613_g1	5.63976298386089	41.9207385653154	-2.894	7.9276e-08	2.6193e-06
c67861_g3	919.615864029789	334.161162615844	1.4605	8.1506e-08	2.6913e-06
c63005_g4	500.553157626329	1389.27862776177	-1.4727	8.1743e-08	2.6974e-06
c74154_g1	2138.55694112617	5649.99479781429	-1.4016	8.2568e-08	2.7228e-06
c12966_g1	2208.39054371313	817.810585602005	1.4332	8.287e-08	2.731e-06
c12753_g1	121.615526307335	32.3669982871599	1.9097	8.3174e-08	2.7393e-06
c62790_g1	36.8537642967787	4.26128865781814	3.1125	8.5306e-08	2.8073e-06
c67301_g1	2055.36621798397	5501.61098225411	-1.4205	8.5349e-08	2.8073e-06
c64025_g2	0.991974476331186	22.2972809857754	-4.4904	8.579e-08	2.82e-06
c61436_g1	1441.32892379104	529.776622263709	1.4439	8.6735e-08	2.8492e-06
c16191_g1	609.400480012383	214.998472771767	1.5031	8.6843e-08	2.8494e-06
c52461_g1	1169.33259107141	3101.45466174189	-1.4073	8.6852e-08	2.8494e-06
c62642_g1	0.854824297578774	22.3439983819155	-4.7081	8.7638e-08	2.8733e-06
c37195_g2	4599.8804697701	1721.50658096673	1.4179	8.7975e-08	2.8825e-06
c67485_g2	1045.41172185847	2776.12247942102	-1.409	8.9516e-08	2.9312e-06
c68086_g1	0.363780379487397	51.1051420010107	-7.1343	9.0242e-08	2.953e-06
c79862_g1	184.759547073513	2689.19142576277	-3.8635	9.1525e-08	2.9931e-06
c74170_g1	567.878794031121	203.52459593265	1.4804	9.1654e-08	2.9954e-06
c39680_g1	161.935667991312	1.010652718654	7.324	9.1808e-08	2.9985e-06
c39734_g2	1.58648230413836	333.315223611213	-7.7149	9.1902e-08	2.9997e-06
c80442_g1	898.034036192572	321.551168290698	1.4817	9.2116e-08	3.0047e-06
c97355_g1	9382.78441421166	3595.84210114822	1.3837	9.2911e-08	3.0287e-06
c62232_g1	0.264413717356393	18.5462724427766	-6.1322	9.3369e-08	3.0417e-06
c47321_g1	1814.45096094582	669.154365503343	1.4391	9.4236e-08	3.068e-06
c67618_g1	14.2931620143433	69.3008220540408	-2.2775	9.4767e-08	3.0833e-06
c43230_g1	0.264413717356393	18.4618663163112	-6.1256	9.5686e-08	3.1113e-06
c65680_g1	28.9673307878779	1.38823524380218	4.3831	9.6117e-08	3.1233e-06
c13028_g1	41.5351681743516	370.881143982407	-3.1586	9.7627e-08	3.1703e-06
c65299_g1	19.1338944535713	0.339893794822961	5.8149	9.8666e-08	3.202e-06
c92213_g1	598.999236874717	211.765431055642	1.5001	9.9252e-08	3.219e-06
c58040_g1	785.998774158597	2091.9853891743	-1.4123	1.0156e-07	3.2917e-06
c65344_g1	127.349934013357	375.902352180126	-1.5616	1.0407e-07	3.3708e-06
c62451_g2	663.499471189177	240.56634907075	1.4637	1.0491e-07	3.396e-06
c59077_g1	2249.355854415	839.677508376307	1.4216	1.0867e-07	3.5154e-06
c50930_g1	7.22214804041445	152.251056297267	-4.3979	1.1012e-07	3.5602e-06
c34983_g1	59.5662136033269	196.463777769084	-1.7217	1.1149e-07	3.6021e-06
c59087_g1	158.969454671982	459.285411512646	-1.5306	1.1177e-07	3.6091e-06
c66921_g6	16.5554376731018	0	Inf	1.1388e-07	3.6749e-06
c63377_g1	193.820516057341	0.670758923831035	8.1747	1.1562e-07	3.7284e-06
c57721_g2	298.873632845542	97.7134589490774	1.6129	1.1644e-07	3.748e-06
c85911_g1	147.129549905699	15.8165193513123	3.2176	1.164e-07	3.748e-06
c97708_g1	15.3326648494574	2128.47946321958	-7.1171	1.1633e-07	3.748e-06
c62530_g1	278.200606482133	768.560956769053	-1.466	1.1677e-07	3.7562e-06
c65065_g1	259.052958204058	81.101033545055	1.6755	1.17e-07	3.7611e-06
c55115_g1	16.9012078162646	0	Inf	1.1716e-07	3.7639e-06
c43854_g1	1.28018782257577	69.9644543544709	-5.7722	1.1779e-07	3.7818e-06
c61453_g1	166.365610753162	474.743468138884	-1.5128	1.1989e-07	3.8469e-06
c57521_g1	440.688707640312	1317.71756530503	-1.5802	1.2125e-07	3.888e-06
c47235_g1	135.003200238834	419.230317638867	-1.6347	1.2262e-07	3.9271e-06
c65132_g2	32.6608574367044	3.11793834949301	3.3889	1.2261e-07	3.9271e-06
c67547_g1	1143.10766336813	367.148921399362	1.6385	1.2385e-07	3.964e-06
c64057_g6	143.822305749424	41.3154495911501	1.7995	1.2585e-07	4.0256e-06
c59937_g1	57.9552187126733	215.073435613858	-1.8918	1.2684e-07	4.0521e-06
c61766_g1	97.0251388584326	290.239909460423	-1.5808	1.2681e-07	4.0521e-06
c62745_g1	105.305991854618	8.21203880721957	3.6807	1.2787e-07	4.0825e-06
c40521_g1	22.9465610448257	1.03028411734945	4.4772	1.2801e-07	4.0843e-06
c52137_g1	34.5717153577234	3.87310339978938	3.158	1.2879e-07	4.1066e-06
c13019_g1	1511.82779103383	3952.82350997902	-1.3866	1.2921e-07	4.1176e-06
c55698_g1	256.142768700903	84.232626899517	1.6045	1.2932e-07	4.1184e-06
c65682_g1	1011.05635939987	2680.41753354783	-1.4066	1.3238e-07	4.2131e-06
c35970_g1	638.907609693965	230.33290896418	1.4719	1.3259e-07	4.2174e-06
c12656_g1	45.5154287214242	214.50102428957	-2.2366	1.3296e-07	4.2266e-06
c65996_g2	33.6890650826651	3.48649220882631	3.2724	1.3347e-07	4.2402e-06
c2291_g1	4330.41373295102	1667.78437922858	1.3766	1.3384e-07	4.249e-06
c67340_g1	80.7793973231003	951.64745048151	-3.5584	1.3506e-07	4.2852e-06
c15358_g2	20.8492615422991	0.737107718666601	4.822	1.3904e-07	4.4088e-06
c43168_g1	605.230194295421	217.023437941828	1.4796	1.4139e-07	4.4804e-06
c64903_g1	1638.08770959418	608.6820722054	1.4283	1.416e-07	4.4842e-06
c54229_g1	358.088446077378	123.308093270157	1.538	1.4293e-07	4.5235e-06
c80350_g1	316.20934170283	106.65584609811	1.5679	1.443e-07	4.5643e-06
c32949_g1	292.571240371678	98.1427605568794	1.5758	1.4518e-07	4.5892e-06
c74209_g1	1977.98512164893	172.407805637759	3.5201	1.4617e-07	4.6176e-06
c65333_g1	1947.95894730959	5066.2730936873	-1.379	1.513e-07	4.7768e-06
c66783_g1	50.3618796542224	8.80515098143856	2.5159	1.5369e-07	4.8493e-06
c64695_g1	775.469393926468	286.859452681215	1.4347	1.541e-07	4.8591e-06
c36283_g1	514.71264741881	1375.30585017829	-1.4179	1.5524e-07	4.892e-06
c85895_g1	6183.31114475372	2379.47029913261	1.3777	1.5569e-07	4.9034e-06
c60452_g1	85.253944280235	257.997699156407	-1.5975	1.5836e-07	4.9842e-06
c61843_g1	1242.8443452367	466.719778239267	1.413	1.5885e-07	4.9967e-06
c22313_g1	215.030894643664	0.330865129008074	9.3441	1.5918e-07	5.0039e-06
c65931_g1	2.37972345620754	30.1235874472017	-3.662	1.5968e-07	5.0166e-06
c97316_g1	271.135634731936	49.0057267055001	2.468	1.6149e-07	5.0703e-06
c43776_g1	60.4646108100907	195.102069552093	-1.6901	1.6518e-07	5.1829e-06
c54914_g1	835.749189802726	309.408465740551	1.4336	1.6553e-07	5.1908e-06
c57959_g1	0	15.6077490790948	-Inf	1.6739e-07	5.2458e-06
c43520_g1	4877.37014138251	1863.67698338961	1.388	1.6782e-07	5.256e-06
c63433_g1	23.057364694097	1.03931278316434	4.4715	1.6843e-07	5.272e-06
c51500_g1	16.5471722789387	0	Inf	1.692e-07	5.2929e-06
c91652_g1	567.686614056098	149.04260029434	1.9294	1.7043e-07	5.3281e-06
c60344_g1	194.942402636668	61.2743108776214	1.6697	1.728e-07	5.3989e-06
c67358_g4	77.064246084762	10.7616816909767	2.8402	1.7406e-07	5.435e-06
c29861_g1	44.0979489221091	7.05896461118364	2.6432	1.7546e-07	5.4751e-06
c26000_g1	990.983175593546	366.475940558581	1.4351	1.7708e-07	5.5223e-06
c59968_g1	40.7123380008306	181.309731269695	-2.1549	1.8248e-07	5.6873e-06
c85972_g1	842.390902168309	311.044694782762	1.4374	1.838e-07	5.7249e-06
c47240_g1	923.518039973835	2430.85577093092	-1.3963	1.8509e-07	5.7618e-06
c12730_g1	41.1460378189841	5.98038903062839	2.7824	1.8595e-07	5.7848e-06
c66879_g2	88.10748527483	15.1073764752601	2.544	1.8886e-07	5.8719e-06
c62321_g6	22.8833566533307	0	Inf	1.8991e-07	5.8996e-06
c62830_g2	37.2741931848261	0.330865129008074	6.8158	1.8998e-07	5.8996e-06
c63859_g1	19.0000576657832	77.2030175747396	-2.0227	1.925e-07	5.9742e-06
c7980_g1	137.8224342397	393.501963648892	-1.5136	1.9375e-07	6.0092e-06
c65768_g6	11.3452063608162	58.2669858068686	-2.3606	2.0153e-07	6.2431e-06
c68126_g1	3311.44005228231	1276.33181149935	1.3755	2.0144e-07	6.2431e-06
c39970_g1	2.13501212015454	122.509869438454	-5.8425	2.0174e-07	6.2458e-06
c66874_g1	870.197020510114	326.274349738087	1.4153	2.0327e-07	6.2892e-06
c15605_g1	733.335895237614	2599.66673783371	-1.8258	2.0461e-07	6.3269e-06
c85919_g1	3606.46972696257	1372.2907135991	1.394	2.0626e-07	6.3742e-06
c53178_g2	1430.9310500493	520.798088163009	1.4582	2.0698e-07	6.3924e-06
c66394_g1	35.1859964658274	4.19493986298257	3.0683	2.0836e-07	6.4314e-06
c56589_g1	477.160659987337	3002.36354581963	-2.6536	2.1456e-07	6.6186e-06
c67538_g1	1350.30470906237	3515.10069794741	-1.3803	2.1579e-07	6.6524e-06
c25122_g1	29.5487094835659	110.069230135248	-1.8972	2.1695e-07	6.6841e-06
c64951_g1	7.6614245541512	46.9712697610332	-2.6161	2.1916e-07	6.7484e-06
c66885_g1	514.889330759599	187.775719957922	1.4553	2.2307e-07	6.8644e-06
c6321_g1	59.7419311553213	316.185974627199	-2.404	2.2489e-07	6.9163e-06
c79864_g1	1326.11922310248	3372.74421339517	-1.3467	2.278e-07	7.0017e-06
c55152_g1	1036.15818477185	389.55866809824	1.4113	2.3577e-07	7.2422e-06
c56757_g1	29.2933276507439	1.7477604373206	4.067	2.3672e-07	7.267e-06
c67490_g4	707.556253738703	261.99308103626	1.4333	2.3693e-07	7.2692e-06
c67452_g1	16.8354565241768	72.715084936348	-2.1108	2.4301e-07	7.4512e-06
c37993_g1	2247.43596467093	863.140450229872	1.3806	2.5039e-07	7.6731e-06
c69323_g1	806.193612670623	222.633003824162	1.8565	2.5277e-07	7.7367e-06
c74025_g1	808.657386652906	2101.19509784753	-1.3776	2.5268e-07	7.7367e-06
c85880_g1	35.6416619699033	621.185695139609	-4.1234	2.5294e-07	7.737e-06
c15318_g1	1577.86476952177	608.356200662094	1.375	2.5337e-07	7.7458e-06
c45780_g1	1164.16325730681	398.249506796985	1.5475	2.5993e-07	7.9415e-06
c98271_g1	728.95267011933	4.16627979847223	7.4509	2.621e-07	8.0029e-06
c38410_g1	0	25.8040998151931	-Inf	2.631e-07	8.0287e-06
c50540_g1	900.913693653419	337.219473394176	1.4177	2.6534e-07	8.0921e-06
c22361_g1	845.937688992765	317.533693999102	1.4136	2.655e-07	8.0924e-06
c66040_g2	336.343067999184	119.372021322969	1.4945	2.763e-07	8.4165e-06
c56127_g1	1184.48399783979	2994.79082738001	-1.3382	2.8473e-07	8.6681e-06
c91650_g1	457.896652698349	1202.87918802415	-1.3934	2.8845e-07	8.776e-06
c45264_g1	418.640131806846	1090.02591387093	-1.3806	2.8963e-07	8.8068e-06
c91781_g1	1218.59511702418	4016.529261618	-1.7207	2.9154e-07	8.8594e-06
c57866_g2	31.5819498389835	111.592200144377	-1.8211	2.9478e-07	8.9527e-06
c98882_g1	59.048340261357	0	Inf	2.9934e-07	9.0857e-06
c52903_g1	1.48301839442256	23.7322336257177	-4.0002	3.0421e-07	9.2283e-06
c86229_g1	712.733600004822	267.924947608398	1.4115	3.08e-07	9.3375e-06
c45639_g1	692.555804506329	1786.29759388232	-1.367	3.1095e-07	9.4214e-06
c4263_g1	165.231051200483	52.3434053066388	1.6584	3.1233e-07	9.4577e-06
c24877_g1	19.6167438764931	79.953976131965	-2.0271	3.1612e-07	9.5609e-06
c67315_g1	17.9825914155849	0.330865129008074	5.7642	3.1608e-07	9.5609e-06
c32431_g1	1410.03304842542	538.794019626844	1.3879	3.1954e-07	9.6587e-06
c68283_g1	1304.2418996799	497.16766316271	1.3914	3.2012e-07	9.6706e-06
c42820_g1	1154.14953133687	191.989587896892	2.5877	3.2207e-07	9.7236e-06
c12919_g1	27.9638484254129	2.38083063082641	3.554	3.231e-07	9.7465e-06
c15555_g1	1561.71380650972	600.719689024886	1.3784	3.2321e-07	9.7465e-06
c93081_g1	387.621381832125	23.9273407921542	4.0179	3.2377e-07	9.7578e-06
c20376_g2	10.0108460312798	78.3459047744742	-2.9683	3.3062e-07	9.9584e-06
c38436_g1	684.855701545755	1763.51916405564	-1.3646	3.3299e-07	1.0024e-05
c85961_g1	12398.5700131059	4897.63312364456	1.34	3.3556e-07	1.0095e-05
c7468_g1	270.352935677205	92.6727878923328	1.5446	3.4088e-07	1.0249e-05
c40579_g2	177.697387019636	35.8272833437113	2.3103	3.4276e-07	1.0294e-05
c43058_g1	19399.8673063748	7675.28299411371	1.3378	3.4268e-07	1.0294e-05
c61066_g2	442.426448442673	159.56509395825	1.4713	3.4442e-07	1.0337e-05
c4772_g1	281.636647157755	97.8628719166179	1.525	3.4682e-07	1.0403e-05
c65526_g1	367.514262893288	969.699577150308	-1.3997	3.4804e-07	1.0434e-05
c39945_g1	255.983440139248	87.5561873870962	1.5478	3.4835e-07	1.0437e-05
c85716_g1	280.74566058954	743.144811216603	-1.4044	3.4908e-07	1.0453e-05
c42684_g1	477.064003357727	174.497641397633	1.451	3.5106e-07	1.0506e-05
c13455_g1	593.104356853762	1535.53629485611	-1.3724	3.5819e-07	1.0713e-05
c65818_g1	6656.91259752849	2630.79046877784	1.3394	3.5968e-07	1.0751e-05
c92580_g1	18.0597796948131	0	Inf	3.6224e-07	1.0822e-05
c66577_g4	1768.49218889358	640.662834648957	1.4649	3.6313e-07	1.0835e-05
c69676_g1	1.35575485581858	22.0178554541045	-4.0215	3.6313e-07	1.0835e-05
c53607_g1	1402.77791367504	539.151698250772	1.3795	3.6359e-07	1.0836e-05
c65865_g2	443.034403731072	1144.46864671185	-1.3692	3.6358e-07	1.0836e-05
c67320_g6	0	71.0559019568683	-Inf	3.6479e-07	1.0866e-05
c15552_g1	150.421265228938	39.8486887525661	1.9164	3.6714e-07	1.0929e-05
c57424_g1	4471.11239229204	1785.14923490469	1.3246	3.7096e-07	1.1034e-05
c61191_g1	1838.45828124893	4755.44646934191	-1.3711	3.7107e-07	1.1034e-05
c65427_g2	400.165074525608	145.126207117859	1.4633	3.7164e-07	1.1044e-05
c4524_g1	607.551435300103	1554.41513464541	-1.3553	3.721e-07	1.1051e-05
c66822_g1	441.438943075143	1147.60729277923	-1.3783	3.7437e-07	1.1112e-05
c64271_g1	13925.6604427586	5216.99824099987	1.4165	3.7739e-07	1.1195e-05
c55036_g1	281.043388714716	97.5062627439255	1.5272	3.7812e-07	1.1211e-05
c64577_g1	200.327761541062	1.07700151348956	7.5392	3.8635e-07	1.1448e-05
c97712_g1	229.644694923959	76.0014682922241	1.5953	3.9207e-07	1.1611e-05
c51206_g1	3028.2563061876	922.583742537342	1.7147	3.9409e-07	1.1664e-05
c85864_g1	1333.89129870454	519.652229469625	1.36	3.9506e-07	1.1686e-05
c66457_g1	28.025502469916	99.6941596352341	-1.8308	4.1086e-07	1.2146e-05
c67004_g3	799.968624040962	302.768152632278	1.4017	4.1427e-07	1.224e-05
c97530_g1	367.267669483214	1293.35758767877	-1.8162	4.1512e-07	1.2258e-05
c63665_g1	15.2851364906745	0	Inf	4.1577e-07	1.227e-05
c22103_g1	483.316979997098	177.426672986909	1.4457	4.2354e-07	1.2485e-05
c64988_g2	550.993963240635	204.666092688592	1.4288	4.2349e-07	1.2485e-05
c54741_g1	661.67650821065	1690.54966202019	-1.3533	4.2889e-07	1.2635e-05
c60219_g1	8.83405121942639	47.2188870940624	-2.4182	4.3169e-07	1.271e-05
c56479_g1	194.595706838898	64.4422983806597	1.5944	4.4015e-07	1.2952e-05
c65703_g3	151.725411844638	413.541850814392	-1.4466	4.4749e-07	1.316e-05
c44336_g1	77.9767154445017	233.714348551413	-1.5836	4.4845e-07	1.3181e-05
c79925_g1	1551.93263784042	605.53779157039	1.3578	4.5049e-07	1.3234e-05
c65994_g1	167.249382013559	901.575203712903	-2.4304	4.5451e-07	1.3344e-05
c66341_g2	40.1638081848144	6.2931968280067	2.674	4.6304e-07	1.3586e-05
c60848_g1	523.77704882365	127.297370605834	2.0408	4.6443e-07	1.362e-05
c58234_g1	622.03300123835	234.632349460914	1.4066	4.8315e-07	1.416e-05
c61002_g2	901.09060055605	2209.89835720428	-1.2942	4.846e-07	1.4195e-05
c63245_g2	206.456147408156	2045.87331708214	-3.3088	4.8521e-07	1.4205e-05
c57820_g1	9.2733986321566	55.2622972716251	-2.5751	4.8879e-07	1.4301e-05
c56188_g1	20.8295591609957	0.992595387024222	4.3913	4.9002e-07	1.4329e-05
c66803_g4	115.752747475926	325.380510704393	-1.4911	4.9084e-07	1.4345e-05
c60751_g1	142.557169267176	389.561440885012	-1.4503	4.9404e-07	1.443e-05
c68050_g1	16.841175017747	1016.52643802619	-5.9155	4.9494e-07	1.4448e-05
c39935_g1	155.198810642921	49.2200980240844	1.6568	4.9855e-07	1.4545e-05
c62394_g1	113.210081104876	19.9498326206564	2.5046	4.9921e-07	1.4556e-05
c61212_g1	693.792183954801	269.436244315391	1.3646	5.0166e-07	1.4619e-05
c86283_g1	14.1042444312362	63.9361411071844	-2.1805	5.0881e-07	1.4819e-05
c7441_g1	562.414784765749	213.105374836238	1.4001	5.1042e-07	1.4857e-05
c12884_g1	1033641.95778291	417058.103418494	1.3094	5.1314e-07	1.4928e-05
c65786_g1	655.460376034737	1666.60879437351	-1.3463	5.1626e-07	1.501e-05
c74592_g1	597.14983766747	226.459110342494	1.3988	5.1955e-07	1.5097e-05
c65544_g1	38.9494425533199	128.393676660691	-1.7209	5.2411e-07	1.5221e-05
c39829_g1	647.250728028481	244.601409484574	1.4039	5.3113e-07	1.5416e-05
c67223_g2	2420.01584002424	6019.53866259761	-1.3146	5.3313e-07	1.5466e-05
c65598_g1	93.2330294040957	266.356050169047	-1.5144	5.3594e-07	1.5538e-05
c67625_g2	37.1584375323559	125.936956970592	-1.7609	5.4722e-07	1.5848e-05
c91805_g1	769.359832917125	29.3417995080512	4.7126	5.4723e-07	1.5848e-05
c62213_g1	83.1426608899752	242.031024243646	-1.5415	5.481e-07	1.5864e-05
c47266_g1	19178.2921957069	7727.15784060526	1.3115	5.5062e-07	1.5928e-05
c67026_g2	2.37152896103796	25.3791046720089	-3.4198	5.5809e-07	1.6135e-05
c13317_g1	30.7647672600392	3.38245468366552	3.1851	5.6087e-07	1.6206e-05
c63916_g2	238.846712035701	82.3413825163709	1.5364	5.6452e-07	1.6302e-05
c53440_g1	3743.64904260757	1502.07291660361	1.3175	5.7004e-07	1.6452e-05
c20212_g1	1268.27967034304	499.090020522601	1.3455	5.817e-07	1.6779e-05
c67241_g1	36.7444400955058	124.253276039145	-1.7577	5.9666e-07	1.7192e-05
c86060_g1	669.970388675155	255.199048495828	1.3925	5.9638e-07	1.7192e-05
c67856_g2	398.665772772338	147.740073859564	1.4321	5.977e-07	1.7212e-05
c68202_g1	1082.57068358059	2772.85008251437	-1.3569	5.9809e-07	1.7213e-05
c65106_g6	2262.4687744254	902.477332172564	1.3259	6.0775e-07	1.7472e-05
c67969_g1	11115.350368174	27329.057869701	-1.2979	6.0761e-07	1.7472e-05
c63669_g2	19.0164466561223	0.661730258016148	4.8449	6.171e-07	1.773e-05
c67637_g3	30.3993656345664	111.79898061295	-1.8788	6.2342e-07	1.7902e-05
c62717_g1	2549.25371388245	6329.04123208854	-1.3119	6.247e-07	1.7929e-05
c5105_g1	1495.59063322114	593.614884744712	1.3331	6.2666e-07	1.7975e-05
c53102_g1	37.5215049542162	0.670758923831035	5.8058	6.3147e-07	1.8103e-05
c4193_g1	91.2638308295379	255.590381887989	-1.4857	6.3247e-07	1.8121e-05
c40020_g1	1730.4179740737	4419.69843257369	-1.3528	6.3884e-07	1.8293e-05
c51337_g2	51.3119733663474	10.119582831656	2.3421	6.4792e-07	1.8543e-05
c61195_g1	1737.58342834249	4272.67841849266	-1.2981	6.5028e-07	1.86e-05
c51052_g1	724.945352680328	2239.26612141444	-1.6271	6.5084e-07	1.8606e-05
c12712_g1	265.431630668791	93.1969147362069	1.51	6.5328e-07	1.8665e-05
c62132_g1	22.9860367064259	1.43652670700798	4.0001	6.5777e-07	1.8783e-05
c67636_g1	3192.2619991481	7946.53421778642	-1.3157	6.6288e-07	1.8918e-05
c20777_g1	86.2992365079128	22.5676778516314	1.9351	6.7585e-07	1.9278e-05
c97377_g1	508.581752251615	191.930933914923	1.4059	6.7628e-07	1.9279e-05
c21745_g1	255.3780104175	2108.47197430376	-3.0455	6.8051e-07	1.9389e-05
c25108_g1	925.398950410743	2808.75363836552	-1.6018	6.9109e-07	1.9679e-05
c53446_g1	19590.8786448546	7972.27016116939	1.2971	6.9503e-07	1.978e-05
c64912_g1	104.144748643739	29.863377577647	1.8021	6.988e-07	1.9877e-05
c61732_g1	172.247325475503	45.9114467340036	1.9076	7.0811e-07	2.013e-05
c52756_g1	1384.97983623106	549.458334290262	1.3338	7.104e-07	2.0184e-05
c66920_g1	415.821862160778	156.558048372814	1.4093	7.1502e-07	2.0304e-05
c68891_g1	334.502807741959	121.43620080039	1.4618	7.2151e-07	2.0477e-05
c51819_g1	23.8868390157957	1.72970310569082	3.7876	7.3369e-07	2.08e-05
c59006_g1	109.757097645524	19.1147515317863	2.5216	7.3357e-07	2.08e-05
c97302_g1	1589.17432720967	637.352826321512	1.3181	7.3797e-07	2.0909e-05
c61669_g1	13980.0666287085	5445.57597061544	1.3602	7.3971e-07	2.0947e-05
c80072_g1	22.2206215318363	83.4433843616173	-1.9089	7.4231e-07	2.1009e-05
c67582_g3	62.1364585223777	0.737107718666601	6.3974	7.4401e-07	2.1046e-05
c66596_g1	3446.69519347882	305.696550222413	3.495	7.5037e-07	2.1214e-05
c11250_g1	128.066912540806	22.9978583046033	2.4773	7.5136e-07	2.123e-05
c59620_g2	142.394314617576	384.792612610738	-1.4342	7.5184e-07	2.1231e-05
c61120_g1	3805.61585922315	1540.68316178133	1.3046	7.5224e-07	2.1231e-05
c45659_g1	83138.082460886	33974.6103576979	1.2911	7.6473e-07	2.1572e-05
c97615_g1	1230.10978204858	486.382370465748	1.3386	7.6537e-07	2.1578e-05
c33206_g1	16.7582682449486	0.330865129008074	5.6625	7.6973e-07	2.1689e-05
c46639_g2	14.5296079562332	0	Inf	7.7359e-07	2.1786e-05
c64203_g1	26.9874790828004	2.37022789794584	3.5092	7.7832e-07	2.1907e-05
c43008_g1	1213.50238560809	485.538907442927	1.3215	7.9029e-07	2.2232e-05
c61193_g1	110.888711700764	0.737107718666601	7.233	7.9433e-07	2.2333e-05
c79868_g1	2304.39600108631	938.836627664242	1.2954	8.0114e-07	2.2512e-05
c67470_g5	161.465217376633	52.833686776215	1.6117	8.0346e-07	2.2565e-05
c61873_g1	54.4766725804611	11.6585729967591	2.2242	8.053e-07	2.2604e-05
c91508_g1	11365.3764591076	4650.71531994473	1.2891	8.1692e-07	2.2918e-05
c65314_g6	89.9214351690681	24.5207809417214	1.8747	8.2173e-07	2.304e-05
c79977_g1	30.4585436774701	3.41111474817586	3.1585	8.5873e-07	2.4064e-05
c63802_g1	72.6950852455515	12.0941708728238	2.5875	8.6128e-07	2.4122e-05
c11179_g1	190.612062001867	498.14252109264	-1.3859	8.7314e-07	2.4441e-05
c59723_g1	30.532560363721	1.69946897411481	4.1672	8.7894e-07	2.459e-05
c66862_g11	30520.8492972735	12402.1231183476	1.2992	8.7945e-07	2.4591e-05
c67651_g1	25.7951500362218	174.318913532906	-2.7566	8.8523e-07	2.4739e-05
c81256_g1	91.3601676966786	252.212050045667	-1.465	9.0131e-07	2.5175e-05
c60858_g1	61.5419680608197	14.2587766326835	2.1097	9.0737e-07	2.533e-05
c5236_g1	5861.30895308901	2389.53093129218	1.2945	9.1999e-07	2.5668e-05
c8186_g1	64.9154999363242	14.8164693655389	2.1314	9.2135e-07	2.5692e-05
c68944_g1	10.2119844581478	77.8724819168217	-2.9309	9.2233e-07	2.5705e-05
c65146_g1	16.6408204474996	0.368553859333301	5.4967	9.2402e-07	2.5739e-05
c97909_g1	103.248898337568	286.930387425985	-1.4746	9.2533e-07	2.5761e-05
c92789_g1	23.3621088286677	1.81410923215616	3.6868	9.3982e-07	2.615e-05
c64869_g6	227.451913309906	874.454525044209	-1.9428	9.4836e-07	2.6374e-05
c8344_g1	1712.29085138295	690.245742251953	1.3107	9.5462e-07	2.6533e-05
c5632_g1	3026.03908697668	1235.61746446739	1.2922	9.5549e-07	2.6543e-05
c74436_g1	1336.06394057877	534.828774898503	1.3208	9.5997e-07	2.6653e-05
c79893_g1	6655.94587838437	2730.72544362915	1.2854	9.6444e-07	2.6762e-05
c68150_g1	1233.48620588878	495.644828286822	1.3154	9.7292e-07	2.6983e-05
c66289_g3	10.8360813074068	51.7643234847485	-2.2561	9.781e-07	2.7112e-05
c53482_g1	18.5927043771107	17834.7358044038	-9.9057	9.8642e-07	2.7328e-05
c67060_g1	509.962445087909	1265.85467931224	-1.3116	1.0115e-06	2.8009e-05
c85724_g1	1556.82091997237	631.139784628176	1.3026	1.0128e-06	2.8029e-05
c85758_g1	4328.82724664387	10359.0630236097	-1.2588	1.0246e-06	2.8339e-05
c50292_g1	14.8909123341212	1023.31782923937	-6.1027	1.0425e-06	2.882e-05
c63273_g1	2.76320621699833	27.2392360784092	-3.3013	1.0491e-06	2.8987e-05
c64675_g1	4.36939090244009	32.332457690966	-2.8875	1.0557e-06	2.9153e-05
c29219_g1	788.206835742211	291.682605403264	1.4342	1.0588e-06	2.9223e-05
c66736_g3	14.1280440601244	0	Inf	1.0673e-06	2.9441e-05
c21486_g1	186.1664793738	63.6589848644751	1.5482	1.0729e-06	2.9579e-05
c66835_g1	1149.77060822777	464.000540119453	1.3091	1.0821e-06	2.9816e-05
c55860_g2	10.4944793108222	52.5136080033613	-2.3231	1.089e-06	2.9991e-05
c61524_g1	16.8633534006498	68.178493588203	-2.0154	1.0945e-06	3.0125e-05
c58906_g1	194.347734210628	2.03033410312288	6.5808	1.0951e-06	3.0127e-05
c65653_g4	33.0107957264455	1.68141164248503	4.2952	1.1019e-06	3.0298e-05
c63365_g1	2600.95675061576	1062.71031640583	1.2913	1.1065e-06	3.0408e-05
c55229_g1	988.050041217116	390.553859631554	1.3391	1.1073e-06	3.0413e-05
c58855_g1	293.425179148837	48.0952681559796	2.609	1.1196e-06	3.0735e-05
c65049_g1	11.8559526602109	62.9633607421295	-2.4089	1.1301e-06	3.1003e-05
c74003_g1	76719.8939903881	31712.3227468035	1.2746	1.1306e-06	3.1003e-05
c45741_g1	14.4483224294202	77.936793536001	-2.4314	1.1327e-06	3.1044e-05
c98351_g1	63.4512582685976	11.7256170134905	2.436	1.1354e-06	3.1102e-05
c68214_g1	354.89161094122	132.317524435921	1.4234	1.145e-06	3.1347e-05
c20563_g1	1547.45816178228	627.499620359203	1.3022	1.1496e-06	3.1456e-05
c55570_g1	857.380016077342	2110.84870308661	-1.2998	1.1665e-06	3.1903e-05
c66324_g1	117.618734971936	7.01224721504352	4.0681	1.1689e-06	3.195e-05
c67451_g1	123.020572565908	37.5199929409728	1.7132	1.1739e-06	3.2071e-05
c62102_g1	193.541365360436	491.335896015683	-1.3441	1.196e-06	3.2657e-05
c74409_g1	343.42788933036	127.736852227145	1.4268	1.2023e-06	3.2811e-05
c65259_g2	1473.64707164438	3546.13945453063	-1.2669	1.2098e-06	3.2996e-05
c9327_g1	3003.37289387621	1232.68216091228	1.2848	1.217e-06	3.3176e-05
c62353_g1	1749.22365670217	628.581670931217	1.4765	1.2225e-06	3.3308e-05
c60167_g1	603.221838387735	1494.95006532866	-1.3093	1.2394e-06	3.3751e-05
c15298_g1	1895.11611139526	774.636586772333	1.2907	1.2459e-06	3.3893e-05
c51605_g1	61.1890535088325	172.367249376639	-1.4941	1.2453e-06	3.3893e-05
c52099_g1	351.226640593749	889.003866960522	-1.3398	1.2611e-06	3.4288e-05
c85764_g1	293.335392762942	109.412685187019	1.4228	1.286e-06	3.4944e-05
c64926_g1	3.00791755305133	28.8549941479546	-3.262	1.3073e-06	3.5506e-05
c67753_g1	1440.87524996017	591.252944036694	1.2851	1.3107e-06	3.5578e-05
c67054_g1	13.9572785113289	61.2032398815888	-2.1326	1.3155e-06	3.5691e-05
c54766_g1	573.665381136902	1541.48301850699	-1.426	1.3196e-06	3.5782e-05
c62537_g1	805.611880913965	1965.97698809636	-1.2871	1.327e-06	3.5963e-05
c66921_g2	4.6674908888331	76.4437770551106	-4.0337	1.3351e-06	3.6165e-05
c63874_g1	588.46334629553	168.342088372988	1.8056	1.3375e-06	3.6211e-05
c54398_g1	296.087999382165	110.033578580579	1.4281	1.3441e-06	3.6369e-05
c53681_g1	145.858181270678	48.2663496978719	1.5955	1.3526e-06	3.658e-05
c65930_g1	626.394743503626	1493.10359228129	-1.2532	1.3571e-06	3.6684e-05
c57536_g1	493.674380028161	190.828699956371	1.3713	1.3672e-06	3.6937e-05
c68179_g1	389.63421484548	92.353500203418	2.0769	1.3889e-06	3.7502e-05
c60840_g1	1.15702153155658	20.3152383458583	-4.1341	1.3973e-06	3.7709e-05
c91911_g1	16.3723094825584	0.339893794822961	5.59	1.402e-06	3.7816e-05
c65353_g1	60.249559394483	13.8329026443296	2.1228	1.4191e-06	3.8257e-05
c57529_g3	377.956257874436	928.005945674157	-1.2959	1.4244e-06	3.838e-05
c39857_g1	830.030954422369	330.786723737602	1.3273	1.4331e-06	3.8595e-05
c67571_g1	85.8621523998016	24.169589192122	1.8288	1.4377e-06	3.8697e-05
c47344_g1	793.258044856754	319.526339371899	1.3119	1.4491e-06	3.8984e-05
c45690_g2	28.8842822170926	3.46843487719653	3.0579	1.4638e-06	3.9358e-05
c66687_g1	354.890095326726	119.031016569671	1.576	1.4667e-06	3.9415e-05
c67972_g1	5656.79414354544	2366.34592854961	1.2573	1.4735e-06	3.9578e-05
c66262_g1	1097.18160269957	439.372573518439	1.3203	1.4848e-06	3.9859e-05
c12894_g1	1101.26612981323	4529.25485894077	-2.0401	1.5182e-06	4.0715e-05
c67686_g3	10.009153886301	48.4511821067761	-2.2752	1.5182e-06	4.0715e-05
c68245_g1	1315.83935101306	537.269706545934	1.2923	1.521e-06	4.0768e-05
c57589_g1	64.3825752540266	183.611756820423	-1.5119	1.5278e-06	4.0929e-05
c66429_g1	115.430688696409	35.0089176327107	1.7212	1.5364e-06	4.1137e-05
c67800_g3	1138.01273667843	471.511673632496	1.2712	1.5397e-06	4.1205e-05
c67744_g2	906.793480765862	2200.79267555953	-1.2792	1.5549e-06	4.1589e-05
c97688_g1	116.616532759046	35.8216822973445	1.7029	1.5564e-06	4.1607e-05
c79856_g1	5005.30227670985	2084.69398306534	1.2636	1.5618e-06	4.1731e-05
c42711_g1	748.714495035199	297.705956235236	1.3305	1.5721e-06	4.1961e-05
c61944_g1	75.3113081763933	365.175779274809	-2.2777	1.5721e-06	4.1961e-05
c66640_g1	6968.24841245649	16765.2043812564	-1.2666	1.5783e-06	4.2105e-05
c42948_g1	80.8343363204322	238.41401597288	-1.5604	1.5983e-06	4.2617e-05
c60738_g1	479.026486885114	185.434759585151	1.3692	1.6001e-06	4.2642e-05
c61851_g1	1311.93724856318	3152.09824356059	-1.2646	1.611e-06	4.291e-05
c64405_g1	280.573543992176	88.9972919432268	1.6565	1.6207e-06	4.3147e-05
c19190_g1	2.59815916177294	24.9155419533296	-3.2615	1.6267e-06	4.3284e-05
c80762_g1	959.0618856286	392.352269700293	1.2895	1.6311e-06	4.3378e-05
c10031_g1	467.188220731066	1147.93856789488	-1.297	1.6506e-06	4.3873e-05
c97934_g1	103.282549874106	0	Inf	1.6606e-06	4.4117e-05
c63629_g1	130.55580103405	342.699393958927	-1.3923	1.6836e-06	4.4705e-05
c65960_g1	5210.91626937245	78.936883910994	6.0447	1.6964e-06	4.5021e-05
c67966_g1	2814.39414877566	6531.28921193372	-1.2145	1.7236e-06	4.5699e-05
c79898_g1	199.864349703716	690.063413481356	-1.7877	1.7238e-06	4.5699e-05
c66215_g2	16.1358635406684	67.8059127495686	-2.0711	1.7321e-06	4.5897e-05
c74675_g1	11.3649087421196	51.6460719839852	-2.1841	1.7435e-06	4.6174e-05
c61547_g1	24435.0610518941	9105.50932952477	1.4241	1.7567e-06	4.65e-05
c21648_g1	60.9951303897824	14.8142000765773	2.0417	1.7727e-06	4.69e-05
c97420_g1	197.946404874309	18.2327694235024	3.4405	1.7775e-06	4.7003e-05
c68013_g1	3000.09032946755	1252.29844449641	1.2604	1.7894e-06	4.7294e-05
c81537_g1	33.3531106806572	4.90496158420451	2.7655	1.7923e-06	4.7344e-05
c58912_g1	13.6271844008781	0	Inf	1.8061e-06	4.7684e-05
c66615_g10	39.2507850316837	5.52585497776408	2.8285	1.8076e-06	4.77e-05
c61431_g1	432.865137426495	1384.74446988501	-1.6776	1.8125e-06	4.7805e-05
c73976_g1	253.837332128364	631.41570287998	-1.3147	1.8143e-06	4.7827e-05
c11571_g1	519.107428431317	1262.3804990366	-1.282	1.8262e-06	4.8116e-05
c61742_g1	2.23437878228554	23.6706070320792	-3.4052	1.8377e-06	4.8394e-05
c63328_g1	215.633832431559	77.8415051913384	1.47	1.8431e-06	4.8511e-05
c67950_g1	5610.70664760582	27539.5119734216	-2.2952	1.8528e-06	4.8717e-05
c74194_g1	988.912280120937	376.215190029872	1.3943	1.8527e-06	4.8717e-05
c67276_g1	0	16.4520424570536	-Inf	1.8661e-06	4.904e-05
c58595_g1	65.7356587775146	3.79772593913893	4.1135	1.8851e-06	4.9514e-05
c91776_g1	386.281188008145	149.491349677564	1.3696	1.8948e-06	4.9744e-05
c64643_g1	488.941191379984	2683.53421458041	-2.4564	1.9048e-06	4.9979e-05
c74575_g1	46.6576116096335	9.05160998398129	2.3659	1.9168e-06	5.0269e-05
c61101_g1	17.7896474838866	288.507025932193	-4.0195	1.9326e-06	5.0659e-05
c63555_g2	834.699831092269	343.929922062469	1.2791	1.9499e-06	5.1086e-05
c36203_g1	1006.50903903565	1.3234605160323	9.5708	1.9559e-06	5.1216e-05
c45687_g3	141.162421644155	245444.433293899	-10.764	1.9576e-06	5.1235e-05
c63224_g1	0.854824297578774	112.745784821015	-7.0432	1.9716e-06	5.1575e-05
c62655_g2	1280.72800932442	525.012931927211	1.2865	1.9782e-06	5.1721e-05
c74028_g1	814.21548425187	201.631865243669	2.0137	1.9818e-06	5.1787e-05
c57626_g1	7875.40301652111	3200.33624966944	1.2991	2.0152e-06	5.2635e-05
c65477_g1	732.475526047475	295.107606151694	1.3115	2.0246e-06	5.2852e-05
c68449_g1	17.9029271347573	798.805693140349	-5.4796	2.0478e-06	5.3431e-05
c97294_g1	1097.21457060929	447.609940632764	1.2935	2.0537e-06	5.3557e-05
c34317_g1	2.47499287075375	24.604308223017	-3.3134	2.071e-06	5.398e-05
c2322_g1	2949.97648131455	1235.12288463401	1.256	2.0828e-06	5.4261e-05
c67490_g8	29.5881142461727	98.1111844715431	-1.7294	2.0902e-06	5.4426e-05
c2076_g1	562.10328544982	224.416791163511	1.3247	2.1215e-06	5.519e-05
c79882_g1	14924.1934829622	6331.90886969631	1.2369	2.1217e-06	5.519e-05
c60502_g2	148.952318987492	50.0145258717717	1.5744	2.1606e-06	5.6175e-05
c80808_g1	493.677728151623	196.493365168795	1.3291	2.1791e-06	5.6625e-05
c54927_g1	13599.0225717276	32119.6035395259	-1.24	2.1839e-06	5.6694e-05
c67704_g1	24.8468902670626	148.727987434611	-2.5815	2.1834e-06	5.6694e-05
c68138_g1	328.639657049334	797.091525290316	-1.2782	2.1866e-06	5.6733e-05
c37773_g1	223.292993681092	558.385581246511	-1.3223	2.2407e-06	5.8079e-05
c45467_g1	40.7220828429921	3.08927828498267	3.7205	2.2396e-06	5.8079e-05
c56825_g1	931.101781389801	382.09669679276	1.285	2.2439e-06	5.8133e-05
c61121_g1	182.810315675986	64.2618209264049	1.5083	2.2472e-06	5.8188e-05
c51126_g1	40.9745593125614	0	Inf	2.2625e-06	5.8556e-05
c63582_g1	949.303415837087	2583.4904441306	-1.4444	2.283e-06	5.9055e-05
c52433_g1	98.6929949546266	29.1163623479957	1.7611	2.2891e-06	5.9184e-05
c51192_g3	2602.33941269161	6335.22556953958	-1.2836	2.3147e-06	5.9815e-05
c69450_g1	44.8017809511891	9.09990144718708	2.2996	2.3165e-06	5.9831e-05
c54925_g1	650.223865124271	260.997849113727	1.3169	2.327e-06	6.0071e-05
c97636_g1	335.745300313156	129.774640929018	1.3714	2.3288e-06	6.0089e-05
c60821_g1	305.437873335923	115.770656742796	1.3996	2.3712e-06	6.115e-05
c64783_g1	0	12.8328526585561	-Inf	2.3738e-06	6.1187e-05
c11745_g1	44.7074371912504	0	Inf	2.3789e-06	6.1288e-05
c68259_g1	780.673051989569	327.422221304691	1.2536	2.3857e-06	6.1432e-05
c44235_g1	43.0814618592626	7.98521120337229	2.4317	2.3888e-06	6.148e-05
c68082_g1	3884.38920120938	1651.04082779124	1.2343	2.4047e-06	6.1859e-05
c4046_g1	1035.49345654316	424.442758476608	1.2867	2.4218e-06	6.2268e-05
c56896_g1	22.2149030382661	108.971070528008	-2.2943	2.4403e-06	6.2713e-05
c64404_g1	46.0145253366982	9.00489258784118	2.3533	2.4628e-06	6.3257e-05
c74032_g1	3159.37299583469	1328.1008571853	1.2503	2.4849e-06	6.3793e-05
c63647_g3	1055.86250532385	2453.8114353337	-1.2166	2.4981e-06	6.4101e-05
c68344_g1	2.52259212853012	24.4528580798202	-3.277	2.5003e-06	6.4126e-05
c66782_g1	17.2550306566101	67.0575070761255	-1.9584	2.54e-06	6.511e-05
c63005_g2	10705.1369549018	4578.0983307791	1.2255	2.5591e-06	6.5533e-05
c79900_g1	79.0247499035035	807.855433370324	-3.3537	2.558e-06	6.5533e-05
c46718_g1	15.6768137466348	63.2382961859087	-2.0122	2.6036e-06	6.664e-05
c65202_g1	10.6233640954115	48.8680274293152	-2.2017	2.6429e-06	6.7611e-05
c55121_g1	208.600584608003	75.3897871877532	1.4683	2.6592e-06	6.7996e-05
[truncated: 2,571 more rows]
